# Supplementary material
Source: PubMed Central journal article supplement (PMC3176681)
Supplement: NIHMS322737-supplement-supplement_1.pdf [file NIHMS322737-supplement-supplement_1.pdf]

S2.1: *Labeotropheus trewavase* family 012 genotypes for LG 5 and LG 7.

***Labeotropheus trewavasae***  
**RLtrMR012**

Ratio M:F  
 6M : 9F  
 total  
 15 ind

**LG 5**

| Fish   | Sex | Length | Color | UNH2139 | cski | GM264A | UNH2139 | cski | GM264A |
|--------|-----|--------|-------|---------|------|--------|---------|------|--------|
| 06-802 | F   |        | OB    | 198     | 211  | 191    | 198     | 223  | 191    |
|        |     |        |       | 215     | 219  | 202    | 215     | 219  | 191    |
| 06-659 | F   | 64     | OB    | 198     | 211  | 191    | 215     | 219  | 191    |
| 06-660 | F   | 62     | OB    | 198     | 211  | 191    | 198     | 223  | 191    |
| 06-661 | F   | 65     | OB    | 198     | 211  | 191    | 198     | 219  | 191    |
| 06-662 | F   | 57     | OB    | 198     | 211  | 191    | 198     | 223  | 191    |
| 06-663 | F   | 56     | OB    | 198     | 211  | 191    | 198     | 223  | 191    |
| 06-667 | F   | 70     | OB    | 198     | 211  | 191    | 198     | 223  | 191    |
| 06-668 | F   | 64     | OB    | 198     | 211  | 191    | 215     | 219  | 191    |
| 06-669 | F   | 60     | OB    | 198     | 211  | 191    | 215     | 219  | 191    |
| 06-670 | F   | 60     | OB    | 198     | 211  | 191    | 215     | 219  | 191    |
| 06-656 | M   | 75     |       | 215     | 219  | 202    | 215     | 219  | 191    |
| 06-657 | M   | 73     |       | 215     | 211  | 202    | 198     | 223  | 191    |
| 06-658 | M   | 66     |       | 215     | 219  | 202    | 198     | 223  | 191    |
| 06-664 | M   | 76     |       | 215     | 219  | 202    | 198     | 223  | 191    |
| 06-665 | M   | 74     |       | 215     | 219  | 202    | 198     | 223  | 191    |
| 06-666 | M   | 73     |       | 215     | 219  | 202    | 215     | 219  | 191    |

**UNH2139**

|     | 198 | 215 |
|-----|-----|-----|
| M 0 | M 0 |     |
| F 5 | F 4 |     |
| M 4 | M 2 |     |
| F 0 | F 0 |     |

**cski**

|     | 223 | 219 |
|-----|-----|-----|
| 211 | M 1 | M 0 |
|     | F 4 | F 5 |
| 219 | M 3 | M 2 |
|     | F 0 | F 0 |

**GM264A**

|     | 191 |
|-----|-----|
| 191 | M 0 |
|     | F 9 |
| 202 | M 6 |
|     | F 0 |

Fisher's Exact using genotypes

X<sup>2</sup> 15  
 P 0.002

X<sup>2</sup> 11.7  
 P 0.009

X<sup>2</sup> 15  
 P <.0001

Fisher's Exact using maternal and paternal alleles

Maternal X<sup>2</sup> 15.000  
 P <.0001

X<sup>2</sup> 11.200  
 P 0.001

X<sup>2</sup> 15.000  
 P <.0001

Paternal X<sup>2</sup> 0.185  
 P 0.667

X<sup>2</sup> 0.714  
 P 0.398

X<sup>2</sup> NI  
 P Homo

**LG 7**

| Fish   | Sex | Length | Color | UNH2095 | UNH2086 | UNH2031 | UNH2095 | UNH2086 | UNH2031 | Fish   | Sex | Color |
|--------|-----|--------|-------|---------|---------|---------|---------|---------|---------|--------|-----|-------|
| 06-802 | F   |        | OB    | 138     | 132     | 135     | 138     | 132     | 135     | 06-79  | M   |       |
|        |     |        |       | 138     | 132     | 135     | 138     | 132     | 135     |        |     |       |
| 06-659 | F   | 64     | OB    | 138     | 132     | 135     | 138     | 132     | 135     | 06-659 | F   | 64    |
| 06-660 | F   | 62     | OB    | 138     | 132     | 135     | 138     | 132     | 135     | 06-660 | F   | 62    |
| 06-661 | F   | 65     | OB    | 138     | 132     | 135     | 138     | 132     | 135     | 06-661 | F   | 65    |
| 06-662 | F   | 57     | OB    | 138     | 132     | 135     | 138     | 132     | 135     | 06-662 | F   | 57    |
| 06-663 | F   | 56     | OB    | 138     | 132     | 135     | 138     | 132     | 135     | 06-663 | F   | 56    |
| 06-667 | F   | 70     | OB    | 138     | 132     | 135     | 138     | 132     | 135     | 06-667 | F   | 70    |
| 06-668 | F   | 64     | OB    | 138     | 132     | 135     | 138     | 132     | 135     | 06-668 | F   | 64    |
| 06-669 | F   | 60     | OB    | 138     | 132     | 135     | 138     | 132     | 135     | 06-669 | F   | 60    |
| 06-670 | F   | 60     | OB    | 138     | 132     | 135     | 138     | 132     | 135     | 06-670 | F   | 60    |
| 06-656 | M   | 75     |       | 138     | 132     | 135     | 138     | 132     | 135     | 06-656 | M   | 75    |
| 06-657 | M   | 73     |       | 138     | 132     | 135     | 138     | 132     | 135     | 06-657 | M   | 73    |
| 06-658 | M   | 66     |       | 138     | 132     | 135     | 138     | 132     | 135     | 06-658 | M   | 66    |
| 06-664 | M   | 76     |       | 138     | 132     | 135     | 138     | 132     | 135     | 06-664 | M   | 76    |
| 06-665 | M   | 74     |       | 138     | 132     | 135     | 138     | 132     | 135     | 06-665 | M   | 74    |
| 06-666 | M   | 73     |       | 138     | 132     | 135     | 138     | 132     | 135     | 06-666 | M   | 73    |

**UNH2095**

|  | 138 |
|--|-----|
|  | M 6 |
|  | F 9 |

**UNH2086**

|  | 132 |
|--|-----|
|  | M 6 |
|  | F 9 |

**UNH2031**

|  | 135 |
|--|-----|
|  | M 6 |
|  | F 9 |

Fisher's Exact using genotypes

X<sup>2</sup> 0  
 P 1

X<sup>2</sup> 0  
 P 1

X<sup>2</sup> 0  
 P 1

Fisher's Exact using maternal and paternal alleles

Maternal X<sup>2</sup> NI  
 P Homo

X<sup>2</sup> NI  
 P Homo

X<sup>2</sup> NI  
 P Homo

Paternal X<sup>2</sup> NI  
 P Homo

X<sup>2</sup> NI  
 P Homo

X<sup>2</sup> NI  
 P Homo

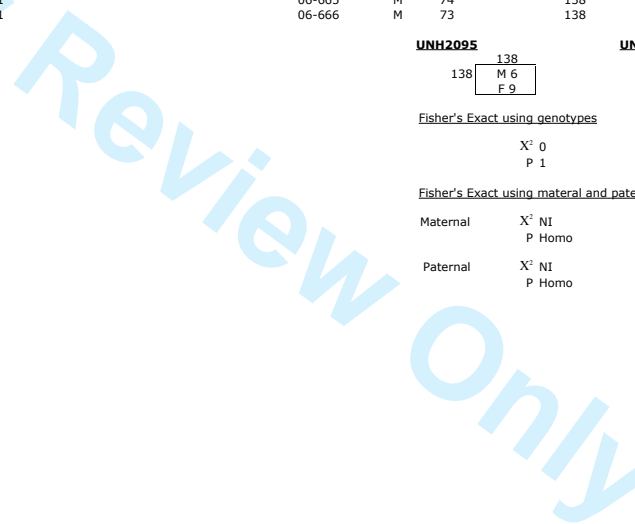

1  
2  
3  
4  
5  
6  
7  
8  
9  
10  
11  
12  
13  
14  
15  
16  
17  
18  
19  
20  
21  
22  
23  
24  
25  
26  
27  
28  
29  
30  
31  
32  
33  
34  
35  
36  
37  
38  
39  
40  
41  
42  
43  
44  
45  
46  
47  
48  
49

1  
2  
3  
4  
5  
6  
7  
8  
9  
10  
11  
12  
13  
14  
15  
16  
17  
18  
19  
20  
21  
22  
23  
24  
25  
26  
27  
28  
29  
30  
31  
32  
33  
34  
35  
36  
37  
38  
39  
40  
41  
42  
43  
44  
45  
46  
47  
48  
49

S2.2: *Labeotropheus trewavase* family 015 genotypes for LG 5 and LG 7.

***Labeotropheus trewavasae*** Ratio M:F total  
**RLtrMR015** 11M : 11F 22 ind

| LG 5    |     |        |       |         |      |        |         |      |        | LG 7    |     |       |      |     |        |       |         |         |         |         |         |         |      |     |       |     |  |
|---------|-----|--------|-------|---------|------|--------|---------|------|--------|---------|-----|-------|------|-----|--------|-------|---------|---------|---------|---------|---------|---------|------|-----|-------|-----|--|
| Fish    | Sex | Length | Color | UNH2139 | cski | GM264A | UNH2139 | cski | GM264A | Fish    | Sex | Color | Fish | Sex | Length | Color | UNH2095 | UNH2086 | UNH2031 | UNH2095 | UNH2086 | UNH2031 | Fish | Sex | Color |     |  |
| 06-896  | F   |        | OB    | 215     | 211  |        | 198     | 223  | 191    | 06-896  | F   |       | OB   |     |        |       | 138     | 132     | 135     |         |         |         | 132  | 135 | 06-79 | M   |  |
|         |     |        |       | 215     | 219  |        | 215     | 219  | 191    |         |     |       |      |     |        |       | 138     | 132     | 135     |         |         |         | 132  | 135 |       |     |  |
| 08-3076 | F   | 58     | OB    | 215     | 211  |        | 198     | 223  |        | 08-3076 | F   | 58    | OB   | 138 | 132    | 135   |         |         | 138     | 132     | 135     |         |      | 138 | 132   | 135 |  |
| 08-3077 | F   | 59     | OB    | 215     | 219  |        | 215     | 223  |        | 08-3077 | F   | 59    | OB   | 138 | 132    | 135   |         |         | 138     | 132     | 135     |         |      | 138 | 132   | 135 |  |
| 08-3078 | F   | 56     | OB    | 215     | 211  |        | 198     | 223  |        | 08-3078 | F   | 56    | OB   | 138 | 132    | 135   |         |         | 138     | 132     | 135     |         |      | 138 | 132   | 135 |  |
| 08-3079 | F   | 57     | OB    | 215     | 211  |        | 215     | 223  |        | 08-3079 | F   | 57    | OB   | 138 | 132    | 135   |         |         | 138     | 132     | 135     |         |      | 138 | 132   | 135 |  |
| 08-3080 | F   | 59     | OB    | 215     | 211  |        | 215     | 219  |        | 08-3080 | F   | 59    | OB   | 138 | 132    | 135   |         |         | 138     | 132     | 135     |         |      | 138 | 132   | 135 |  |
| 08-3081 | F   | 55     | OB    | 215     | 211  |        | 215     | 219  |        | 08-3081 | F   | 55    | OB   | 138 | 132    | 135   |         |         | 138     | 132     | 135     |         |      | 138 | 132   | 135 |  |
| 08-3082 | F   | 60     | OB    | 215     | 211  |        | 215     | 219  |        | 08-3082 | F   | 60    | OB   | 138 | 132    | 135   |         |         | 138     | 132     | 135     |         |      | 138 | 132   | 135 |  |
| 08-3083 | F   | 56     | OB    | 215     | 211  |        | 198     | 219  |        | 08-3083 | F   | 56    | OB   | 138 | 132    | 135   |         |         | 138     | 132     | 135     |         |      | 138 | 132   | 135 |  |
| 08-3084 | F   | 56     | OB    | 215     | 211  |        | 215     | 223  |        | 08-3084 | F   | 56    | OB   | 138 | 132    | 135   |         |         | 138     | 132     | 135     |         |      | 138 | 132   | 135 |  |
| 08-3085 | F   | 58     | OB    | 215     | 211  |        | 198     | 223  |        | 08-3085 | F   | 58    | OB   | 138 | 132    | 135   |         |         | 138     | 132     | 135     |         |      | 138 | 132   | 135 |  |
| 08-3086 | F   | 57     | OB    | 215     | 219  |        | 198     |      |        | 08-3086 | F   | 57    | OB   | 138 | 132    | 135   |         |         | 138     | 132     | 135     |         |      | 138 | 132   | 135 |  |
| 08-3087 | M   | 64     |       | 215     | 219  |        | 215     | 219  |        | 08-3087 | M   | 64    |      | 138 | 132    | 135   |         |         | 138     | 132     | 135     |         |      | 138 | 132   | 135 |  |
| 08-3088 | M   | 61     |       | 215     | 219  |        | 215     | 219  |        | 08-3088 | M   | 61    |      | 138 | 132    | 135   |         |         | 138     | 132     | 135     |         |      | 138 | 132   | 135 |  |
| 08-3089 | M   | 63     |       | 215     | 219  |        | 215     | 219  |        | 08-3089 | M   | 63    |      | 138 | 132    | 135   |         |         | 138     | 132     | 135     |         |      | 138 | 132   | 135 |  |
| 08-3090 | M   | 63     |       | 215     | 219  |        | 215     | 219  |        | 08-3090 | M   | 63    |      | 138 | 132    | 135   |         |         | 138     | 132     | 135     |         |      | 138 | 132   | 135 |  |
| 08-3091 | M   | 60     |       | 215     | 219  |        | 198     | 223  |        | 08-3091 | M   | 60    |      | 138 | 132    | 135   |         |         | 138     | 132     | 135     |         |      | 138 | 132   | 135 |  |
| 08-3092 | M   | 65     |       | 215     |      |        | 198     |      |        | 08-3092 | M   | 65    |      | 138 | 132    | 135   |         |         | 138     | 132     | 135     |         |      | 138 | 132   | 135 |  |
| 08-3093 | M   | 63     |       | 215     | 219  |        | 215     | 219  |        | 08-3093 | M   | 63    |      | 138 | 132    | 135   |         |         | 138     | 132     | 135     |         |      | 138 | 132   | 135 |  |
| 08-3094 | M   | 61     |       | 215     | 219  |        | 198     | 223  |        | 08-3094 | M   | 61    |      | 138 | 132    | 135   |         |         | 138     | 132     | 135     |         |      | 138 | 132   | 135 |  |
| 08-3095 | M   | 64     |       | 215     | 219  |        | 215     | 219  |        | 08-3095 | M   | 64    |      | 138 | 132    | 135   |         |         | 138     | 132     | 135     |         |      | 138 | 132   | 135 |  |
| 08-3096 | M   | 65     |       | 215     | 219  |        | 198     | 223  |        | 08-3096 | M   | 65    |      | 138 | 132    | 135   |         |         | 138     | 132     | 135     |         |      | 138 | 132   | 135 |  |
| 08-3097 | M   | 62     |       | 215     | 219  |        | 215     | 219  |        | 08-3097 | M   | 62    |      | 138 | 132    | 135   |         |         | 138     | 132     | 135     |         |      | 138 | 132   | 135 |  |

| UNH2139 |     |     | cski |     |     |
|---------|-----|-----|------|-----|-----|
| 215     | 198 | 215 | 211  | 223 | 219 |
| M 4     | M 7 | M 0 | M 0  | M 0 | F 4 |
| F 5     | F 6 | F 6 | F 5  | F 4 | F 4 |
|         |     |     | 219  | M 3 | M 7 |
|         |     |     |      | F 1 | F 0 |

Fisher's Exact using genotypes

|                      |                   |
|----------------------|-------------------|
| X <sup>2</sup> 0.188 | X <sup>2</sup> 17 |
| P 0.665              | P 0.001           |

Fisher's Exact using maternal and paternal alleles

|          |                      |                     |
|----------|----------------------|---------------------|
| Maternal | X <sup>2</sup> NI    | X <sup>2</sup> 16.4 |
|          | P Homo               | P <.0001            |
| Paternal | X <sup>2</sup> 0.188 | X <sup>2</sup> 1.82 |
|          | P 0.665              | P 0.178             |

| UNH2095 |      | UNH2086 |      | UNH2031 |      |
|---------|------|---------|------|---------|------|
| 138     | 138  | 132     | 132  | 135     | 135  |
| M 11    | M 11 | M 11    | M 11 | M 11    | M 11 |
| F 11    | F 11 | F 11    | F 11 | F 11    | F 11 |

Fisher's Exact using genotypes

|                  |                  |                  |
|------------------|------------------|------------------|
| X <sup>2</sup> 0 | X <sup>2</sup> 0 | X <sup>2</sup> 0 |
| P 1              | P 1              | P 1              |

Fisher's Exact using maternal and paternal alleles

|          |                   |                   |                   |
|----------|-------------------|-------------------|-------------------|
| Maternal | X <sup>2</sup> NI | X <sup>2</sup> NI | X <sup>2</sup> NI |
|          | P Homo            | P Homo            | P Homo            |
| Paternal | X <sup>2</sup> NI | X <sup>2</sup> NI | X <sup>2</sup> NI |
|          | P Homo            | P Homo            | P Homo            |

S3.1: *Metriaclima barlowi* family A009 genotypes for LG 5 and LG 7.

**M. barlowi**  
**Meba-A009** Ratio M:F total  
 5M: 3F 8 ind

**LG 5**

| Fish      | Sex | Length | UNH2139 | cski | GM264A |
|-----------|-----|--------|---------|------|--------|
| 20055040  | F   |        | 216     | 213  | 209    |
|           |     |        | 170     | 223  | 209    |
| 200600506 | F   | 58     | 216     | 213  | 209    |
| 200600510 | F   | 52     | 216     | 213  | 209    |
| 200600511 | F   | 51     | 170     | 223  | 209    |
| 200600505 | M   | 44     | 216     | 213  | 209    |
| 200600507 | M   | 63     | 170     | 223  | 209    |
| 200600508 | M   | 56     | 170     | 223  | 209    |
| 200600509 | M   | 57     | 216     | 213  | 209    |
| 200600512 | M   | 63     | 216     | 213  | 209    |

| UNH2139 | cski | GM264A |
|---------|------|--------|
| 198     | 217  | 233    |
| 212     | 205  | 203    |
| 198     | 217  | 233    |
| 198     | 217  | 233    |
| 198     | 205  | 203    |
| 198     | 217  | 233    |
| 212     | 205  | 203    |
| 198     | 217  | 203    |
| 212     | 205  | 203    |

Fish Sex  
 20055039 M

**LG 7**

| Fish      | Sex | Length | UNH2095 | UNH2086 | UNH2031 |
|-----------|-----|--------|---------|---------|---------|
| 20055040  | F   |        | 135     | 155     | 170     |
|           |     |        | 142     | 174     | 164     |
| 200600506 | F   | 58     | 135     | 155     | 170     |
| 200600510 | F   | 52     | 142     | 174     | 164     |
| 200600511 | F   | 51     | 135     | 155     | 170     |
| 200600505 | M   | 44     | 142     | 174     | 164     |
| 200600507 | M   | 63     | 135     | 155     | 170     |
| 200600508 | M   | 56     | 142     | 174     | 164     |
| 200600509 | M   | 57     | 142     | 174     | 164     |
| 200600512 | M   | 63     | 135     | 155     | 170     |

| UNH2095 | UNH2086 | UNH2031 | Fish     | Sex |
|---------|---------|---------|----------|-----|
| 139     | 162     | 183     | 20055039 | M   |
| 139     | 170     | 144     |          |     |
| 139     | 170     | 144     |          |     |
| 139     | 170     | 144     |          |     |
| 139     | 170     | 183     |          |     |
| 139     | 162     | 183     |          |     |
| 139     | 162     | 183     |          |     |
| 139     | 162     | 183     |          |     |
| 139     | 162     | 183     |          |     |

| UNH2139 | cski |
|---------|------|
| 216     | 213  |
| 170     | 223  |
| 213     | 209  |
| 223     | 209  |

| GM264A |
|--------|
| 233    |
| 203    |
| 209    |

| UNH2095 | UNH2086 |
|---------|---------|
| 135     | 155     |
| 142     | 174     |
| 142     | 174     |

| UNH2031 |
|---------|
| 183     |
| 144     |
| 170     |
| 164     |

Fisher's Exact using genotypes

X<sup>2</sup> 1.6  
 P 0.659

X<sup>2</sup> 1.6  
 P 0.659

X<sup>2</sup> 0.533  
 P 0.465

Fisher's Exact using genotypes

X<sup>2</sup> 0.533  
 P 0.465

X<sup>2</sup> 4.55  
 P 0.208

X<sup>2</sup> 8  
 P 0.046

Fisher's Exact using maternal and paternal alleles

Maternal X<sup>2</sup> 0.036  
 P 0.850

X<sup>2</sup> 0.036  
 P 0.850

X<sup>2</sup> NI  
 P Homo

Fisher's Exact using maternal and paternal alleles

Maternal X<sup>2</sup> 0.533  
 P 0.465

X<sup>2</sup> 0.533  
 P 0.465

X<sup>2</sup> 0.533  
 P 0.465

Paternal X<sup>2</sup> 1.600  
 P 0.206

X<sup>2</sup> 0.036  
 P 0.850

X<sup>2</sup> 0.900  
 P 0.343

Paternal X<sup>2</sup> NI  
 P Homo

X<sup>2</sup> 3.730  
 P 0.053

X<sup>2</sup> 8.000  
 P 0.005

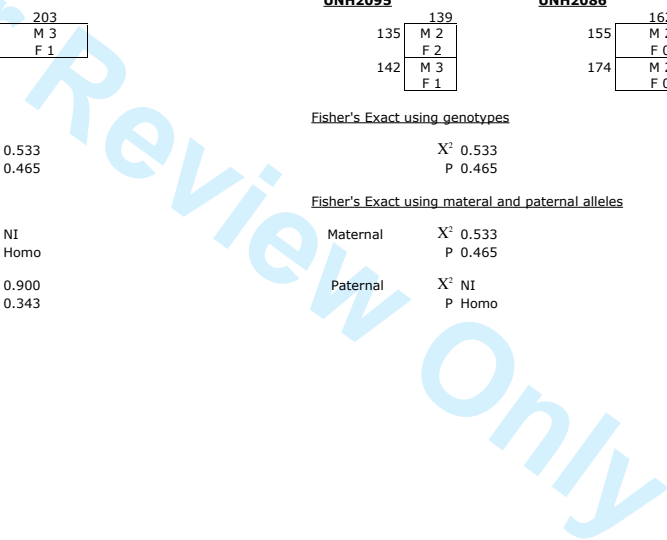

1  
2  
3  
4  
5  
6  
7  
8  
9  
10  
11  
12  
13  
14  
15  
16  
17  
18  
19  
20  
21  
22  
23  
24  
25  
26  
27  
28  
29  
30  
31  
32  
33  
34  
35  
36  
37  
38  
39  
40  
41  
42  
43  
44  
45  
46  
47  
48  
49

1  
2  
3  
4  
5  
6  
7  
8  
9  
10  
11  
12  
13  
14  
15  
16  
17  
18  
19  
20  
21  
22  
23  
24  
25  
26  
27  
28  
29  
30  
31  
32  
33  
34  
35  
36  
37  
38  
39  
40  
41  
42  
43  
44  
45  
46  
47  
48  
49

S3.2: *Metriaclima barlowi* family A010 genotypes for LG 5 and LG 7.

| <i>M. barlowi</i> Meba-A010 |     |        |            |            |            |            |            |            |      | Ratio M:F<br>OM: 11F |        |           |            |            |           |            |            |      |     | total<br>11 ind |  |  |  |  |  |  |  |  |  |
|-----------------------------|-----|--------|------------|------------|------------|------------|------------|------------|------|----------------------|--------|-----------|------------|------------|-----------|------------|------------|------|-----|-----------------|--|--|--|--|--|--|--|--|--|
| LG 5                        |     |        |            |            |            |            |            |            |      | LG 7                 |        |           |            |            |           |            |            |      |     |                 |  |  |  |  |  |  |  |  |  |
| Fish                        | Sex | Length | UNH2139    | cski       | GM264A     | UNH2139    | cski       | GM264A     | Fish | Sex                  | Length | UNH2095   | UNH2086    | UNH2031    | UNH2095   | UNH2086    | UNH2031    | Fish | Sex |                 |  |  |  |  |  |  |  |  |  |
| 2005005075                  | F   |        | 170<br>194 | 217<br>217 | 220<br>229 | 194<br>170 | 217<br>225 | 220<br>229 | m2   | M                    |        | 98<br>164 | 198<br>163 | 139<br>139 | 98<br>137 | 169<br>198 | 139<br>139 | m2   | M   |                 |  |  |  |  |  |  |  |  |  |
| 200600645                   | F   | 68     | 170        | 217        | 220        | 170        | 217        | 220        |      |                      | 68     | 98        | 198        | 139        | 137       | 169        | 139        |      |     |                 |  |  |  |  |  |  |  |  |  |
| 200600646                   | F   | 68     | 170        | 217        | 220        | 194        | 225        | 220        |      |                      | 68     | 98        | 163        | 139        | 137       | 198        | 139        |      |     |                 |  |  |  |  |  |  |  |  |  |
| 200600647                   | F   | 66     | 170        | 217        |            | 170        | 225        |            |      |                      | 66     | 164       | 163        | 139        | 137       | 198        | 139        |      |     |                 |  |  |  |  |  |  |  |  |  |
| 200600648                   | F   | 56     | 170        | 217        | 220        | 194        | 217        | 229        |      |                      | 56     | 98        |            | 139        | 137       |            | 139        |      |     |                 |  |  |  |  |  |  |  |  |  |
| 200600649                   | F   | 63     | 194        | 217        | 229        | 194        | 225        | 220        |      |                      | 63     | 164       | 163        | 139        | 98        | 169        | 139        |      |     |                 |  |  |  |  |  |  |  |  |  |
| 200600650                   | F   | 66     | 170        | 217        | 229        | 194        | 217        | 229        |      |                      | 66     | 98        | 198        | 139        | 98        | 169        | 139        |      |     |                 |  |  |  |  |  |  |  |  |  |
| 200600651                   | F   | 56     | 170        | 217        |            | 170        | 217        |            |      |                      | 56     | 98        | 198        | 139        | 98        | 169        | 139        |      |     |                 |  |  |  |  |  |  |  |  |  |
| 200600652                   | F   | 60     | 170        | 217        | 229        | 194        | 217        | 229        |      |                      | 60     | 98        | 198        | 139        | 98        | 169        | 139        |      |     |                 |  |  |  |  |  |  |  |  |  |
| 200600653                   | F   | 62     | 194        | 217        | 220        | 194        | 225        | 229        |      |                      | 62     | 164       | 163        | 139        | 137       | 198        | 139        |      |     |                 |  |  |  |  |  |  |  |  |  |
| 200600654                   | F   | 67     |            |            |            |            |            |            |      |                      | 67     |           |            |            |           |            |            |      |     |                 |  |  |  |  |  |  |  |  |  |
| 200600655                   | F   | 54     | 170        | 217        | 229        | 194        | 217        | 220        |      |                      | 54     | 164       | 163        | 139        | 137       | 198        | 139        |      |     |                 |  |  |  |  |  |  |  |  |  |

  

| UNH2139 |     |     | cski |     |     | GM264A |     |     | UNH2095 |     |     | UNH2086 |     |     | UNH2031 |     |     |
|---------|-----|-----|------|-----|-----|--------|-----|-----|---------|-----|-----|---------|-----|-----|---------|-----|-----|
| 170     | M 0 | M 0 | 217  | M 0 | M 0 | 220    | M 0 | M 0 | 98      | M 0 | M 0 | 198     | M 0 | M 0 | 139     | M 0 | M 0 |
|         | F 3 | F 5 |      | F 6 | F 4 |        | F 2 | F 4 |         | F 3 | F 3 |         | F 4 | F 0 |         | F 1 | F 4 |
| 194     | M 0 | M 0 |      |     |     | 229    |     | M 0 | 164     | M 0 | M 0 | 163     | M 0 | M 0 |         |     |     |
|         | F 0 | F 2 |      |     |     |        |     | F 2 |         | F 1 | F 3 |         | F 1 | F 4 |         |     |     |

  

| UNH2095 |     |     | UNH2086 |     |     | UNH2031 |     |     |
|---------|-----|-----|---------|-----|-----|---------|-----|-----|
| 98      | M 0 | M 0 | 198     | M 0 | M 0 | 139     | M 0 | M 0 |
|         | F 3 | F 3 |         | F 4 | F 0 |         | F 1 | F 4 |
| 164     | M 0 | M 0 | 163     | M 0 | M 0 |         |     |     |
|         | F 1 | F 3 |         | F 1 | F 4 |         |     |     |

  

| Fisher's Exact using genotypes |     |  | Fisher's Exact using genotypes |     |  | Fisher's Exact using genotypes |     |  | Fisher's Exact using genotypes |     |  | Fisher's Exact using genotypes |     |  |
|--------------------------------|-----|--|--------------------------------|-----|--|--------------------------------|-----|--|--------------------------------|-----|--|--------------------------------|-----|--|
| X <sup>2</sup> 0               | P 1 |  |

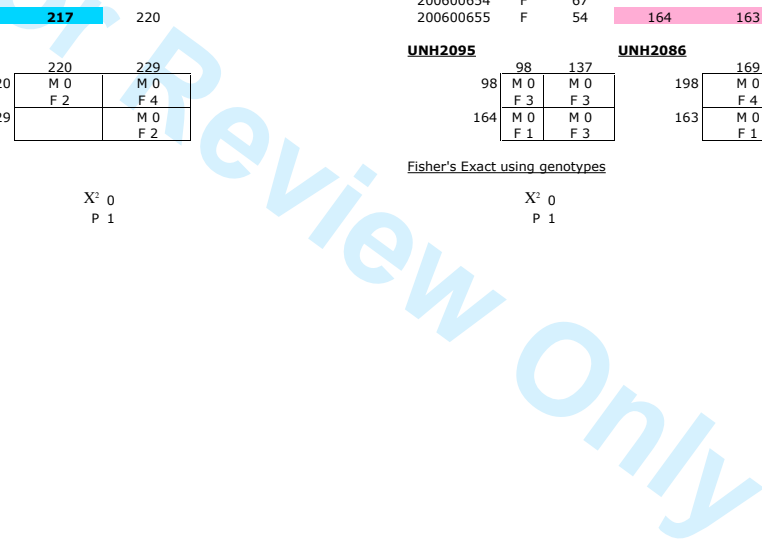

S3.3: *Metriaclima barlowi* family A016 genotypes for LG 5 and LG 7.

**M. barlowi**  
Meba-A016 Ratio M:F total  
18M : 5F 23 ind

| LG 5      |     |        |         |      |        | LG 7      |     |        |         |         |         |           |     |
|-----------|-----|--------|---------|------|--------|-----------|-----|--------|---------|---------|---------|-----------|-----|
| Fish      | Sex | Length | UNH2139 | cski | Gm264a | Fish      | Sex | Length | UNH2095 | UNH2086 | UNH2031 | Fish      | Sex |
| 200600367 | F   |        | 194     | 213  | 227    | 200600368 | M   |        | 165     | 163     | 140     | 200600368 | M   |
|           |     |        | 194     | 223  | 227    |           |     |        | 136     | 200     | 140     |           |     |
| 200601295 | F   | 49     | 194     | 223  | 227    | 200601295 | F   | 49     | 136     | 200     | 140     | 200601295 | F   |
| 200601299 | F   | 46     | 194     | 213  | 227    | 200601299 | F   | 46     | 136     | 163     | 140     | 200601299 | F   |
| 200601302 | F   | 46     | 194     | 223  | 227    | 200601302 | F   | 46     | 136     | 200     | 140     | 200601302 | F   |
| 200601304 | F   | 48     | 194     | 223  | 227    | 200601304 | F   | 48     | 136     | 163     | 140     | 200601304 | F   |
| 200601311 | F   | 37     | 194     | 223  | 227    | 200601311 | F   | 37     | 136     | 127?    | 140     | 200601311 | F   |
| 200601289 | M   | 39     | 194     | 223  | 227    | 200601289 | M   | 39     | 165     | 200     | 140     | 200601289 | M   |
| 200601290 | M   | 43     | 194     | 223  | 227    | 200601290 | M   | 43     | 136     | 200     | 140     | 200601290 | M   |
| 200601291 | M   | 47     | 194     | 213  | 227    | 200601291 | M   | 47     | 136     | 200     | 140     | 200601291 | M   |
| 200601292 | M   | 52     | 194     | 223  | 227    | 200601292 | M   | 52     | 165     | 163     | 140     | 200601292 | M   |
| 200601293 | M   | 49     | 194     | 213  | 227    | 200601293 | M   | 49     | 136     | 200     | 140     | 200601293 | M   |
| 200601294 | M   | 52     | 194     | 223  | 227    | 200601294 | M   | 52     | 165     | 163     | 140     | 200601294 | M   |
| 200601296 | M   | 42     | 194     | 223  | 227    | 200601296 | M   | 42     | 136     | 200     | 140     | 200601296 | M   |
| 200601297 | M   | 49     | 194     | 213  | 227    | 200601297 | M   | 49     | 136     | 200     | 140     | 200601297 | M   |
| 200601298 | M   | 51     | 194     | 213  | 227    | 200601298 | M   | 51     | 165     | 163     | 140     | 200601298 | M   |
| 200601300 | M   | 44     | 194     | 213  | 227    | 200601300 | M   | 44     | 165     | 163     | 140     | 200601300 | M   |
| 200601301 | M   | 52     | 194     | 213  | 227    | 200601301 | M   | 52     | 165     | 163     | 140     | 200601301 | M   |
| 200601303 | M   | 49     | 194     | 223  | 227    | 200601303 | M   | 49     | 136     | 200     | 140     | 200601303 | M   |
| 200601305 | M   | 52     | 194     | 223  | 227    | 200601305 | M   | 52     | 136     | 200     | 140     | 200601305 | M   |
| 200601306 | M   | 49     | 194     | 213  | 227    | 200601306 | M   | 49     | 136     | 200     | 140     | 200601306 | M   |
| 200601307 | M   | 47     | 194     | 213  | 227    | 200601307 | M   | 47     | 165     | 163     | 140     | 200601307 | M   |
| 200601308 | M   | 46     | 194     | 213  | 227    | 200601308 | M   | 46     | 165     | 200     | 140     | 200601308 | M   |
| 200601309 | M   | 51     | 194     | 213  | 227    | 200601309 | M   | 51     | 165     | 163     | 140     | 200601309 | M   |
| 200601310 | M   | 40     | 194     | 213  | 227    | 200601310 | M   | 40     | 136     | 163     | 140     | 200601310 | M   |

| UNH2139 | cski | Gm264a |
|---------|------|--------|
| 194     | 223  | 221    |
| M 13    | M 6  | M 18   |
| F 4     | F 1  | F 5    |
| 169     | 215  |        |
| M 5     | M 5  |        |
| F 1     | F 0  |        |
|         | M 6  |        |
|         | F 1  |        |
|         | M 1  |        |
|         | F 3  |        |

Fisher's Exact using genotypes

X<sup>2</sup> 0.123  
P 0.726

X<sup>2</sup> 8.52  
P 0.036

X<sup>2</sup> 0  
P 1

Fisher's Exact using maternal and paternal alleles

Maternal X<sup>2</sup> NI  
P NI

Paternal X<sup>2</sup> 0.123  
P 0.726

X<sup>2</sup> 2.650  
P 0.104

X<sup>2</sup> 1.170  
P 0.280

X<sup>2</sup> NI  
P Homo

X<sup>2</sup> NI  
P Homo

| UNH2095 | UNH2086 | UNH2031 |
|---------|---------|---------|
| 173     | 179     | 122     |
| M 4     | M 5     | M 3     |
| F 2     | F 3     | F 1     |
| 136     | 200     | 140     |
| M 5     | M 4     | M 5     |
| F 0     | F 0     | F 1     |
| 165     | 163     | 140     |
| M 5     | M 3     | M 7     |
| F 0     | F 1     | F 2     |

Fisher's Exact using genotypes

X<sup>2</sup> 5.642  
P 0.0595

X<sup>2</sup> 4.152  
P 0.2455

X<sup>2</sup> 0.001  
P 0.973

Fisher's Exact using maternal and paternal alleles

Maternal X<sup>2</sup> 4.110  
P 0.043

Paternal X<sup>2</sup> 0.157  
P 0.692

X<sup>2</sup> 0.0407  
P 0.8400

X<sup>2</sup> 0.509  
P 0.476

X<sup>2</sup> NI  
P Homo

X<sup>2</sup> 0.0020  
P 0.964

1  
2  
3  
4  
5  
6  
7  
8  
9  
10  
11  
12  
13  
14  
15  
16  
17  
18  
19  
20  
21  
22  
23  
24  
25  
26  
27  
28  
29  
30  
31  
32  
33  
34  
35  
36  
37  
38  
39  
40  
41  
42  
43  
44  
45  
46  
47  
48  
49

S3.4: *Metriaclima barlowi* family A019 genotypes for LG 5 and LG 7.

**M. barlowi**  
**Meba-A019** Ratio M:F total  
11 M: 12 F 23 ind

LG 5

| Fish      | Sex | Length | UNH2139    | cski       | Gm264a  |
|-----------|-----|--------|------------|------------|---------|
| 2006-808  | F   |        | 194<br>179 | 225<br>211 |         |
| 200701020 | F   | 55     | 179        | 211        | 213 219 |
| 200701021 | F   | 58     | 194        | 225        | 168 215 |
| 200701022 | F   | 57     |            | 225        | 213 215 |
| 200701023 | F   | 57     | 179        | 211        | 213 219 |
| 200701024 | F   | 56     | 194        | 225        | 168 215 |
| 200701025 | F   | 46     | 194        | 225        | 213 219 |
| 200701037 | F   | 59     | 179        | 211        | 168 215 |
| 200701038 | F   | 54     | 179        | 211        | 168 215 |
| 200701039 | F   | 57     | 194        | 211        | 168 215 |
| 200701040 | F   | 53     | 194        | 225        | 213 219 |
| 200701041 | F   | 55     | 194        | 225        | 213 219 |
| 200701019 | M   | 59     | 194        | 225        | 168 215 |
| 200701026 | M   | 62     | 194        | 225        | 213 219 |
| 200701027 | M   | 60     | 194        | 211        | 168 215 |
| 200701028 | M   | 58     | 194        | 225        | 213 219 |
| 200701029 | M   | 61     | 194        | 225        | 213 219 |
| 200701030 | M   | 57     | 179        | 225        | 168 215 |
| 200701031 | M   | 62     | 194        | 225        | 213 219 |
| 200701032 | M   | 61     | 194        | 225        | 213 219 |
| 200701033 | M   | 59     | 179        | 211        | 213 219 |
| 200701034 | M   | 59     | 179        | 211        | 168 215 |
| 200701035 | M   | 54     | 179        | 211        | 213 219 |
| 200701036 | M   | 58     | 179        | 211        | 213 215 |

LG 7

| Fish      | Sex | Length | UNH2095    | UNH2086    | UNH2031    | Fish      | Sex |
|-----------|-----|--------|------------|------------|------------|-----------|-----|
| 06-808    | F   |        | 154<br>185 | 159<br>188 | 168<br>137 | 06-408    | M   |
| 200701020 | F   | 55     | 154        | 159        | 168        | 200701020 | F   |
| 200701021 | F   | 58     | 154        | 159        | 168        | 200701021 | F   |
| 200701022 | F   | 57     | 154        | 188        | 168        | 200701022 | F   |
| 200701023 | F   | 57     | 185        | 188        | 137        | 200701023 | F   |
| 200701024 | F   | 56     | 185        | 188        | 137        | 200701024 | F   |
| 200701025 | F   | 46     | ?          | 159        | 168        | 200701025 | F   |
| 200701037 | F   | 59     | 154        | 159        | 168        | 200701037 | F   |
| 200701038 | F   | 54     | 185        | 159        | 168        | 200701038 | F   |
| 200701039 | F   | 57     | 154        | 159        | 168        | 200701039 | F   |
| 200701040 | F   | 53     | 185        | 159        | 168        | 200701040 | F   |
| 200701041 | F   | 55     | ?          | 188        | 137        | 200701041 | F   |
| 200701019 | M   | 59     | 154        | 159        | 168        | 200701019 | M   |
| 200701026 | M   | 62     | 154        | 159        | 168        | 200701026 | M   |
| 200701027 | M   | 60     | 185        | 159        | 168        | 200701027 | M   |
| 200701028 | M   | 58     | 154        | 159        | 168        | 200701028 | M   |
| 200701029 | M   | 61     | 185        | 159        | 168        | 200701029 | M   |
| 200701030 | M   | 57     | 185        | 159        | 168        | 200701030 | M   |
| 200701031 | M   | 62     | 154        | 159        | 168        | 200701031 | M   |
| 200701032 | M   | 61     | 154        | 188        | 137        | 200701032 | M   |
| 200701033 | M   | 59     | 185        | 159        | 168        | 200701033 | M   |
| 200701034 | M   | 59     | 154        | 159        | 168        | 200701034 | M   |
| 200701035 | M   | 54     | 154        | 159        | 168        | 200701035 | M   |
| 200701036 | M   | 58     | ?          | 188        | 137        | 200701036 | M   |

| UNH2139                  | cski                     |
|--------------------------|--------------------------|
| 194                      | 225                      |
| 179                      | 211                      |
| M 5<br>F 3<br>M 3<br>F 2 | M 2<br>F 3<br>M 2<br>F 2 |
| 219                      | 215                      |
| M 5<br>F 3<br>M 2<br>F 2 | M 2<br>F 3<br>M 3<br>F 3 |

| UNH2095                  | UNH2086                  |
|--------------------------|--------------------------|
| 154                      | 159                      |
| 185                      | 188                      |
| M 6<br>F 3<br>M 4<br>F 2 | M 1<br>F 2<br>M 0<br>F 2 |
| 184                      | 208                      |
| M 9<br>F 1<br>M 0<br>F 0 | M 1<br>F 6<br>M 0<br>F 2 |

| UNH2031                  |
|--------------------------|
| 168                      |
| 137                      |
| M 9<br>F 2<br>M 1<br>F 0 |
| 135                      |
| 122                      |
| M 1<br>F 6<br>M 1<br>F 3 |

Fisher's Exact using genotypes

X<sup>2</sup> 0.724  
P 0.868

X<sup>2</sup> 0.658  
P 0.883

Fisher's Exact using maternal and paternal alleles

Maternal X<sup>2</sup> 0.006  
P 0.937

Paternal X<sup>2</sup> 0.354  
P 0.552

X<sup>2</sup> 0.034  
P 0.855

X<sup>2</sup> 0.381  
P 0.537

Fisher's Exact using genotypes

X<sup>2</sup> 3.84  
P 0.279

X<sup>2</sup> 12  
P 0.003

X<sup>2</sup> 10  
P 0.019

Fisher's Exact using maternal and paternal alleles

Maternal X<sup>2</sup> 0.135  
P 0.714

Paternal X<sup>2</sup> 3.630  
P 0.057

X<sup>2</sup> 1.150  
P 0.283

X<sup>2</sup> 12.700  
P <.0001

X<sup>2</sup> 0.379  
P 0.538

X<sup>2</sup> 9.760  
P 0.002

S4.1: *Metriaclima benetos* family A002 genotypes for LG 5 and LG 7.

**M. benetos** Ratio M:F total  
**MebeMZ-A002** 11M : 10F 21 ind

| LG 5    |     |        |         |        |        | LG 7    |     |        |         |         |         |        |        |
|---------|-----|--------|---------|--------|--------|---------|-----|--------|---------|---------|---------|--------|--------|
| Fish    | Sex | Length | UNH2139 | cski   | GM264A | Fish    | Sex | Length | UNH2095 | UNH2086 | UNH2031 | Fish   | Sex    |
| 04L-90  | F   |        | 213     | 211    | 218    | 04L-27  | M   |        | 150     | 164     | 195     | 04L-27 | M      |
|         |     |        | 221     | 221    | 223    |         |     |        |         | 172     | 195     |        |        |
| 05L-114 | F   |        | 221     | 221    | 223    | 05L-114 | F   | 150    | 172     | 195     | 150     | 172    | 195    |
| 05L-115 | F   |        | 213     | 221    | 218    | 05L-115 | F   | 150    | 172     | 195     | 150     | 172    | 195    |
| 05L-124 | F   | 80     | 213     | 211    | 218    | 05L-124 | F   | 80     | 164     | 195     | 150     | 172    | 195    |
| 05L-128 | F   | 73     | 213     | 211    | 218    | 05L-128 | F   | 73     | 172     | 195     | 150     | 172    | 195    |
| 05L-129 | F   | 74     | 213     | 211    | 223    | 05L-129 | F   | 74     | 172     | 195     | 150     | 172    | 195    |
| 05L-130 | F   | 72     | 213     | 221    | 223    | 05L-130 | F   | 72     | 172     | 195     | 150     | 172    | 195    |
| 05L-131 | F   | 77     | 221     | 221    | 223    | 05L-131 | F   | 77     | 164     | 195     | 150     | 172    | 195    |
| 05L-132 | F   | 83     | 221     | 211    | 218    | 05L-132 | F   | 83     | 164     | 195     | 150     | 172    | 195    |
| 05L-133 | F   | 75     | 221     | 211    | 218    | 05L-133 | F   | 75     | 164     | 195     | 150     | 172    | 195    |
| 05L-134 | F   | 72     | 213     | 211    | 218    | 05L-134 | F   | 72     | 172     | 195     | 150     | 172    | 195    |
| 05L-116 | M   | 83     | 221     | 221    | 223    | 05L-116 | M   | 83     | 172     | 195     | 150     | 157    | 126    |
| 05L-117 | M   | 73     | 221     | 221    | 223    | 05L-117 | M   | 73     | 164     | 195     | 150     | 157    | 126    |
| 05L-118 | M   | 75     | 213     | 211    | 223    | 05L-118 | M   | 75     | 164     | 195     | 150     | 157    | 126    |
| 05L-119 | M   | 81     | no DNA  | no DNA | no DNA | 05L-119 | M   | 81     | no DNA  | no DNA  | no DNA  | no DNA | no DNA |
| 05L-120 | M   | 78     | 213     | 211    | 218    | 05L-120 | M   | 78     | 164     | 195     | 150     | 157    | 126    |
| 05L-121 | M   | 87     | 213     | 211    | 223    | 05L-121 | M   | 87     | 164     | 195     | 150     | 157    | 126    |
| 05L-122 | M   | 83     | 221     | 221    | 223    | 05L-122 | M   | 83     | 172     | 195     | 150     | 157    | 126    |
| 05L-123 | M   | 81     | 213     | 211    | 218    | 05L-123 | M   | 81     | 164     | 195     | 150     | 157    | 126    |
| 05L-125 | M   | 80     | 221     | 221    | 223    | 05L-125 | M   | 80     | 172     | 195     | 150     | 157    | 126    |
| 05L-126 | M   | 80     | 221     | 221    | 223    | 05L-126 | M   | 80     | 172     | 195     | 150     | 157    | 126    |
| 05L-127 | M   | 81     | 221     | 211    | 223    | 05L-127 | M   | 81     | 164     | 195     | 150     | 172    | 195    |

**UNH 2139** **cski**

|     |     |     |     |     |
|-----|-----|-----|-----|-----|
| 213 | M 2 | M 2 | 211 | M 5 |
|     | F 3 | F 3 |     | F 6 |
| 221 | M 5 | M 1 | 221 | M 5 |
|     | F 0 | F 4 |     | F 4 |

**GM264a**

|     |     |     |
|-----|-----|-----|
| 218 | M 1 | M 1 |
|     | F 1 | F 5 |
| 223 | M 2 | M 6 |
|     | F 3 | F 1 |

**UNH 2095** **UNH 2086**

|     |     |     |     |
|-----|-----|-----|-----|
| 150 | M 3 | 157 | 172 |
|     | F 9 |     |     |
| 164 | M 5 | M 1 |     |
|     | F 0 | F 4 |     |
| 172 | M 4 | M 0 |     |
|     | F 0 | F 6 |     |

**UNH 2031**

|     |     |      |
|-----|-----|------|
| 195 | M 9 | M 1  |
|     | F 0 | F 10 |

Fisher's Exact using genotypes

$X^2$  7.2  
P 0.066

$X^2$  0.202  
P 0.653

$X^2$  6.44  
P 0.092

Fisher's Exact using genotypes

$X^2$  0  
P 1

$X^2$  16.8  
P 0.001

$X^2$  16.4  
P <.0001

Fisher's Exact using maternal and paternal alleles

Maternal  $X^2$  0.800  
P 0.371

$X^2$  0.202  
P 0.653

$X^2$  3.330  
P 0.068

Maternal  $X^2$  NI  
P Homo

$X^2$  0.800  
P 0.371

$X^2$  NI  
P Homo

Paternal  $X^2$  3.200  
P 0.074

$X^2$  NI  
P Homo

$X^2$  0.220  
P 0.639

Paternal  $X^2$  NI  
P Homo

$X^2$  16.400  
P <.0001

$X^2$  16.400  
P <.0001



S4.2: *Metriaclima benetos* family A006 genotypes for LG 5 and LG 7.

**M. benetos**  
**Mebe-A006** Ratio M:F total  
 6M : 13F 29 ind  
 10 unknown

| LG 5      |      |        |         |      |        | LG 7    |      |        |           |      |        |         |         |         |         |         |         |          |     |
|-----------|------|--------|---------|------|--------|---------|------|--------|-----------|------|--------|---------|---------|---------|---------|---------|---------|----------|-----|
| Fish      | Sex  | Length | UNH2139 | cski | GM264A | UNH2139 | cski | GM264A | Fish      | Sex  | Length | UNH2095 | UNH2086 | UNH2031 | UNH2095 | UNH2086 | UNH2031 | Fish     | Sex |
| 200555153 | F    |        | 228     | 221  | 215    | 223     | 219  | 225    | 20055091  | M    |        | 153     | 172     | 183     | 153     | 157     | 126     | 20055091 | M   |
|           |      |        | 211     | 211  | 219    | 191     | 215  | 219    |           |      |        | 163     | 149     | 187     | 163     | 172     | 195     |          |     |
| 200600270 | F    | 36     | 228     | 221  | 219    | 223     | 219  | 219    | 200600270 | F    | 36     | 153     | 172     | 183     | 153     | 172     | 195     |          |     |
| 200600274 | F    | 55     | 228     | 221  | 215    | 191     | 215  | 225    | 200600274 | F    | 55     | 153     | 172     | 183     | 153     | 172     | 195     |          |     |
| 200600275 | F    | 46     | 211     | 211  | 219    | 191     | 215  | 219    | 200600275 | F    | 46     | 153     | 149     | 187     | 153     | 172     | 195     |          |     |
| 200600276 | F    | 43     | 211     | 211  | 215    | 191     | 215  | 219    | 200600276 | F    | 43     | 163     | 149     | 187     | 163     | 172     | 195     |          |     |
| 200600277 | F    | 50     | 228     | 221  | 219    | 223     | 219  | 219    | 200600277 | F    | 50     | 163     | 149     | 187     | 163     | 172     | 195     |          |     |
| 200600278 | F    | 48     | 228     | 221  | 215    | 223     | 219  | 225    | 200600278 | F    | 48     | 163     | 149     | 187     | 163     | 172     | 195     |          |     |
| 200600281 | F    | 55     | 211     | 211  | 215    | 223     | 219  | 225    | 200600281 | F    | 55     | 153     | 172     | 183     | 153     | 172     | 195     |          |     |
| 200600283 | F    | 43     | 211     | 211  | 215    | 191     | 215  | 225    | 200600283 | F    | 43     | 153     | 172     | 183     | 153     | 172     | 195     |          |     |
| 200600284 | F    | 45     | 228     | 221  | 215    | 191     | 215  | 225    | 200600284 | F    | 45     | 153     | 172     | 183     | 153     | 157     | 195     |          |     |
| 200600285 | F    | 47     | 228     | 221  | 215    | 191     | 215  | 219    | 200600285 | F    | 47     | 153     | 172     | 183     | 153     | 172     | 195     |          |     |
| 200600289 | F    | 52     | 228     | 221  | 215    | 223     | 219  | 219    | 200600289 | F    | 52     | 163     | 172     | 187     | 163     | 157     | 126     |          |     |
| 200600501 | F    | 51     | 211     | 211  | 215    | 223     | 219  | 225    | 200600501 | F    | 51     | 153     | 149     | 183     | 153     | 172     | 195     |          |     |
| 200600504 | F    | 42     | 211     | 211  | 219    | 191     | 215  | 219    | 200600504 | F    | 42     | 163     | 149     | 187     | 163     | 172     | 195     |          |     |
| 200600279 | M    | 53     | 228     | 221  | 215    | 191     | 215  | 225    | 200600279 | M    | 53     | 153     | 172     | 183     | 153     | 157     | 126     |          |     |
| 200600280 | M    | 43     | 228     | 221  | 219    | 223     | 219  | 219    | 200600280 | M    | 43     | 153     | 172     | 183     | 153     | 157     | 126     |          |     |
| 200600282 | M    | 50     | 228     | 221  | 215    | 223     | 219  | 225    | 200600282 | M    | 50     | 153     | 172     | 183     | 153     | 157     | 126     |          |     |
| 200600286 | M    | 57     | 228     | 221  | 215    | 191     | 219  | 219    | 200600286 | M    | 57     | 153     | 172     | 183     | 153     | 157     | 126     |          |     |
| 200600287 | M    | 61     | 211     | 211  | 219    | 191     | 215  | 225    | 200600287 | M    | 61     | 163     | 149     | 187     | 163     | 157     | 126     |          |     |
| 200600288 | M    | 59     | 211     | 211  | 219    | 191     | 215  | 219    | 200600288 | M    | 59     | 153     | 149     | 183     | 153     | 157     | 126     |          |     |
| 200600290 | ?(M) | 46     | 228     | 221  | 219    | 223     | 219  | 225    | 200600290 | ?(M) | 46     | 153     | 172     | 183     | 153     | 172     | 126     |          |     |
| 200600503 | ?(M) | 45     | 211     | 211  | 219    | 223     | 219  | 225    | 200600503 | ?(M) | 45     | 153     | 172     | 183     | 153     | 157     | 126     |          |     |
| 200600266 | ?    | 34     | 228     | 221  |        | 191     | 215  |        | 200600266 | ?    | 34     | 163     | 149     | 187     | 163     | 157     | 126     |          |     |
| 200600267 | ?    | 37     | 228     | 221  | 215    | 223     | 219  | 219    | 200600267 | ?    | 37     | 163     | 149     | 187     | 163     | 157     | 126     |          |     |
| 200600268 | ?    | 40     | 211     | 211  | 219    | 191     | 215  | 225    | 200600268 | ?    | 40     | 153     | 172     | 183     | 153     | 157     | 126     |          |     |
| 200600269 | ?    | 37     | 228     | 221  | 215    | 191     | 215  | 225    | 200600269 | ?    | 37     | 153     | 172     | 183     | 153     | 157     | 126     |          |     |
| 200600271 | ?    | 47     | 211     | 211  | 215    | 223     | 219  | 225    | 200600271 | ?    | 47     | 163     | 149     | 187     | 163     | 157     | 126     |          |     |
| 200600272 | ?    | 38     | 211     | 211  | 219    | 191     | 219  | 225    | 200600272 | ?    | 38     | 153     | 149     | 187     | 153     | 157     | 126     |          |     |
| 200600273 | ?    | 41     | 228     | 221  | 215    | 223     | 219  | 225    | 200600273 | ?    | 41     | 153     | 172     | 183     | 153     | 157     | 126     |          |     |
| 200600502 | ?    | 44     | 211     | 211  | 215    | 223     | 219  | 225    | 200600502 | ?    | 44     | 163     |         | 187     | 163     |         | 195     |          |     |

| UNH2139 |                    | cski |                    | GM264A |                    |
|---------|--------------------|------|--------------------|--------|--------------------|
| 228     | M 2<br>F 4<br>Un 3 | 221  | M 3<br>F 5<br>UN 3 | 219    | M 1<br>F 2<br>UN 2 |
| 211     | M 0<br>F 2<br>Un 3 | 211  | M 0<br>F 2<br>UN 4 | 215    | M 2<br>F 4<br>UN 1 |

| UNH2095 |                    | UNH2086 |                    | UNH2031 |                    |
|---------|--------------------|---------|--------------------|---------|--------------------|
| 153     | M 5<br>F 8<br>Un 6 | 172     | M 4<br>F 2<br>Un 4 | 157     | M 0<br>F 5<br>Un 1 |
| 163     | M 1<br>F 5<br>Un 4 | 149     | M 2<br>F 0<br>Un 0 | 187     | M 0<br>F 6<br>Un 4 |

Fisher's Exact using genotypes

$X^2$  1.1  
P 0.776

$X^2$  1.07  
P 0.785

Fisher's Exact using maternal and paternal alleles

Maternal  $X^2$  0.277  
P 0.599

Paternal  $X^2$  0.277  
P 0.599

$X^2$  0.277  
P 0.599

$X^2$  0.024  
P 0.876

Fisher's Exact using genotypes

$X^2$  0.903  
P 0.342

$X^2$  12.8  
P 0.005

Fisher's Exact using maternal and paternal alleles

Maternal  $X^2$  0.903  
P 0.342

Paternal  $X^2$  0.903  
P 0.342

$X^2$  0.277  
P 0.599

$X^2$  12.100  
P 0.001

$X^2$  16.7  
P 0.001

$X^2$  1.530  
P 0.216

$X^2$  15.000  
P <.0001

S4.3: *Metriclaima benetos* family A007 genotypes for LG 5 and LG 7.

**M. benetos**  
**Mebe-A007** Ratio M:F total  
 11M : 26F 40 ind  
 3 Unkown

| LG 5      |      |        |         |      |        | LG 7 |     |        |         |         |         |      |     |        |         |         |         |
|-----------|------|--------|---------|------|--------|------|-----|--------|---------|---------|---------|------|-----|--------|---------|---------|---------|
| Fish      | Sex  | Length | UNH2139 | cski | GM264A | Fish | Sex | Length | UNH2095 | UNH2086 | UNH2031 | Fish | Sex | Length | UNH2095 | UNH2086 | UNH2031 |
| 06-107    | F    |        | 229     | 219  | 215    | 223  | 215 | 225    | 153     | 172     | 182     | 153  | 157 | 126    | 153     | 157     | 126     |
|           |      |        | 210     | 209  | 219    | 191  | 219 | 219    | 163     | 149     | 186     | 163  | 172 | 195    | 163     | 172     | 195     |
| 200600792 | F    | 60     | 229     | 219  | 219    | 223  | 219 | 225    | 163     | 149     | 182     | 163  | 172 | 195    | 163     | 172     | 195     |
| 200600793 | F    | 55     | 229     | 219  | 219    | 223  | 219 | 219    | 153     | 172     | 182     | 153  | 172 | 195    | 153     | 172     | 195     |
| 200600796 | F    | 56     | 229     | 219  | 219    | 191  | 215 | 219    | 153     | 172     | 182     | 153  | 172 | 195    | 153     | 172     | 195     |
| 200600799 | F    | 54     | 229     | 219  | 215    | 191  | 215 | 219    | 153     | 172     | 182     | 153  | 172 | 195    | 153     | 172     | 195     |
| 200600901 | F    | 52     |         | 219  | 215    |      | 215 | 219    | 163     | 149     |         | 163  | 172 |        | 163     | 172     |         |
| 200600902 | F    | 59     | 210     |      | 219    | 223  |     | 225    | 163     | 172     | 186     | 163  | 157 | 195    | 163     | 157     | 195     |
| 200600904 | F    | 53     | 229     | 219  | 219    | 223  | 215 | 225    | 153     | 172     | 182     | 153  | 172 | 195    | 153     | 172     | 195     |
| 200600905 | F    | 59     | 229     | 219  | 215    | 223  | 219 | 225    | 153     | 172     | 182     | 153  | 172 | 195    | 153     | 172     | 195     |
| 200600909 | F    | 55     | 210     | 209  | 219    | 191  | 215 | 219    | 163     | 172     | 182     | 163  | 172 | 195    | 163     | 172     | 195     |
| 200600910 | F    | 50     | 229     | 219  | 215    | 223  | 219 | 219    | 163     | 149     | 186     | 163  | 157 | 126    | 163     | 157     | 126     |
| 200600911 | F    | 62     | 210     | 209  | 215    | 223  | 219 | 225    | 163     | 149     | 186     | 163  | 172 | 195    | 163     | 172     | 195     |
| 200600913 | F    | 57     | 210     | 209  | 219    | 223  | 219 | 225    | 153     | 149     | 186     | 153  | 172 | 195    | 153     | 172     | 195     |
| 200600914 | F    | 51     | 210     | 209  |        | 191  | 215 |        | 163     | 172     | 182     | 163  | 172 | 195    | 163     | 172     | 195     |
| 200600915 | F    | 49     | 229     | 219  | 215    | 223  | 215 | 219    | 163     | 149     | 186     | 163  | 172 | 195    | 163     | 172     | 195     |
| 200600917 | F    | 50     | 210     | 209  | 219    | 223  | 219 | 225    | 153     | 149     | 186     | 153  | 172 | 195    | 153     | 172     | 195     |
| 200600918 | F    | 56     | 210     | 209  | 215    | 223  | 219 | 219    | 153     | 149     | 186     | 153  | 172 | 195    | 153     | 172     | 195     |
| 200600919 | F    | 50     | 210     | 219  | 215    | 223  | 219 | 225    | 153     | 172     | 182     | 153  | 172 | 195    | 153     | 172     | 195     |
| 200600774 | F    | 54     | 229     | 219  | 215    | 191  | 215 | 219    | 153     | 172     | 186     | 153  | 172 | 195    | 153     | 172     | 195     |
| 200600785 | F    | 43     | 210     | 209  | 219    | 223  | 219 | 225    | 153     | 149     | 186     | 153  | 172 | 195    | 153     | 172     | 195     |
| 200600786 | F    | 53     | 229     | 219  | 215    | 223  | 219 | 225    | 163     | ?       | 186     | 163  | 157 | 195    | 163     | 157     | 195     |
| 200600787 | F    | 42     | 229     | 219  | 215    | 191  | 215 | 219    | 163     | 172     | 182     | 163  | 172 | 195    | 163     | 172     | 195     |
| 200600789 | F    | 39     | 210     | 209  | 219    | 223  | 219 | 219    | 153     | 172     | 182     | 153  | 172 | 195    | 153     | 172     | 195     |
| 200600790 | F    | 43     | 210     | 209  | 215    | 223  | 219 | 225    | 163     | 172     | 182     | 163  | 157 |        | 163     | 157     |         |
| 200600776 | F    |        | 229     | 209  | 219    | 223  | 219 | 225    | 163     | 149     | 186     | 163  | 172 | 195    | 163     | 172     | 195     |
| 200600781 | F    |        |         | 209  | 215    |      | 215 | 219    | 153     | 172     |         | 153  | 157 |        | 153     | 157     |         |
| 200600763 | F    | 39     | 210     | 209  | 219    | 223  | 219 | 225    | 163     | ?       | 186     | 163  | 157 | 195    | 163     | 157     | 195     |
| 200600794 | M    | 60     | 229     | 219  | 215    | 223  | 219 | 225    | 163     | 172     | 182     | 163  | 157 | 126    | 163     | 157     | 126     |
| 200600795 | M    | 60     | 229     | 219  | 215    | 191  | 215 | 219    | 163     | 149     | 186     | 163  | 157 | 126    | 163     | 157     | 126     |
| 200600797 | M    | 52     | 229     | 219  | 215    | 223  | 219 | 225    | 163     | 149     | 186     | 163  | 172 | 126    | 163     | 172     | 126     |
| 200600798 | M    | 51     | 210     | 209  | 219    | 223  | 215 | 225    | 153     | 149     | 182     | 153  | 172 | 126    | 153     | 172     | 126     |
| 200600800 | M    | 55     | 210     | 209  | 215    | 191  | 215 | 219    | 163     | 149     | 186     | 163  | 157 | 126    | 163     | 157     | 126     |
| 200600903 | M    | 58     | 210     |      | 219    | 191  |     | 219    | 163     | 172     | 186     | 163  | 157 | 126    | 163     | 157     | 126     |
| 200600906 | M    | 51     | 229     | 219  | 219    | 191  | 215 | 219    | 153     | 149     | 182     | 153  | 172 | 126    | 153     | 172     | 126     |
| 200600907 | M    | 56     | 229     | 219  | 215    | 191  | 215 | 219    | 153     | 172     | 182     | 153  | 172 | 126    | 153     | 172     | 126     |
| 200600908 | M    | 51     | 210     | 209  | 219    | 191  | 215 | 219    | 153     | 172     | 182     | 153  | 172 | 126    | 153     | 172     | 126     |
| 200600912 | M    | 63     | 210     | 209  | 215    | 223  | 219 | 219    | 163     | 149     | 186     | 163  | 157 | 195    | 163     | 157     | 195     |
| 200600779 | M    |        |         | 219  | 215    |      | 219 | 225    | 153     | 172     |         | 153  | 157 |        | 153     | 157     |         |
| 200600916 | ?    | 50     | 229     | 219  | 219    | 191  | 215 | 219    | 153     |         | 182     | 153  |     | 126    | 153     |         | 126     |
| 200600788 | ?(F) | 39     | 210     | 209  | 215    | 191  | 215 | 219    | 163     | 149     | 186     | 163  | 172 | 195    | 163     | 172     | 195     |
| 200600782 | ?(M) | 47     | 229     | 219  | 215    | 191  | 215 | 219    | 153     | 172     | 182     | 153  | 157 | 126    | 153     | 157     | 126     |

| UNH2139 |             | cski               |     | GM264A     |                    |
|---------|-------------|--------------------|-----|------------|--------------------|
| 229     | M 2<br>F 8  | M 3<br>F 4<br>Un 2 | 219 | M 3<br>F 6 | M 3<br>F 7<br>Un 2 |
| 210     | M 2<br>F 10 | M 3<br>F 2<br>Un 1 | 209 | M 1<br>F 9 | M 3<br>F 3<br>Un 1 |

| UNH2095 |                     | UNH2086 |                     | UNH2031 |                    |
|---------|---------------------|---------|---------------------|---------|--------------------|
| 153     | M 5<br>F 13<br>Un 2 | 163     | M 7<br>F 12<br>Un 1 | 172     | M 5<br>F 3<br>Un 1 |
| 163     |                     |         |                     | 149     | M 2<br>F 1<br>Un 1 |

Fisher's Exact using genotypes

$X^2$  4.23 P 0.238       $X^2$  3.15 P 0.369       $X^2$  2.33 P 0.507

Fisher's Exact using maternal and paternal alleles

Maternal  $X^2$  0.000 P 1       $X^2$  0.184 P 0.668       $X^2$  0.419 P 0.517

Paternal  $X^2$  1.300 P 0.253       $X^2$  0.116 P 0.734       $X^2$  0.749 P 0.387

Fisher's Exact using genotypes

$X^2$  0.347 P 0.556       $X^2$  10.20 P 0.017       $X^2$  22.70 P <.0001

Fisher's Exact using maternal and paternal alleles

Maternal  $X^2$  0.344 P 0.556       $X^2$  0.717 P 0.397       $X^2$  0.134 P 0.714

Paternal  $X^2$  0.344 P 0.556       $X^2$  7.280 P 0.007       $X^2$  20.700 P <.0001

1  
2  
3  
4  
5  
6  
7  
8  
9  
10  
11  
12  
13  
14  
15  
16  
17  
18  
19  
20  
21  
22  
23  
24  
25  
26  
27  
28  
29  
30  
31  
32  
33  
34  
35  
36  
37  
38  
39  
40  
41  
42  
43  
44  
45  
46  
47  
48  
49

S5.1: *Metricolima callainos* family Rmca012 genotypes for LG 5 and LG 7.

**M. callainos** Ratio M:F total  
**Rmca012** 5M : 13F 18 ind

| LG 5      |     |        |       |         |      |        |         |      |        |           |     |       |
|-----------|-----|--------|-------|---------|------|--------|---------|------|--------|-----------|-----|-------|
| Fish      | Sex | Length | Color | UNH2139 | cski | Gm264a | UNH2139 | cski | Gm264a | Fish      | Sex | Color |
| 200600185 | F   |        | White | 230     | 215  | 235    | 208     | 209  | 235    | 200600128 | M   | Blue  |
|           |     |        |       | 196     | 211  | 235    | 215     | 211  | 229    |           |     |       |
| 200601205 | F   | 54     | White | 230     | 215  | 235    | 215     | 211  | 229    |           |     |       |
| 200601206 | F   | 52     | White | 230     | 215  | 235    | 208     | 209  | 229    |           |     |       |
| 200601207 | F   | 49     | White | 230     | 215  | 235    | 208     | 209  | 229    |           |     |       |
| 200601208 | F   | 53     | White | 230     | 215  | 235    | 215     | 211  | 229    |           |     |       |
| 200601209 | F   | 52     | White | 230     | 215  | 235    | 208     | 209  | 229    |           |     |       |
| 200601210 | F   | 51     | White | 196     | 215  | 235    | 215     | 211  | 229    |           |     |       |
| 200601211 | F   | 49     | White | 230     | 215  | 235    | 208     | 211  | 235    |           |     |       |
| 200601194 | F   | 48     | Blue  | 196     | 211  | 235    | 208     | 209  | 235    |           |     |       |
| 200601195 | F   | 53     | Blue  | 196     | 211  | 235    | 208     | 209  | 229    |           |     |       |
| 200601196 | F   | 50     | Blue  | 196     | 211  | 235    | 215     | 211  | 229    |           |     |       |
| 200601202 | F   | 54     | Blue  | 196     | 211  | 235    | 215     | 209  | 229    |           |     |       |
| 200601203 | F   | 52     | Blue  | 196     | 211  | 235    | 208     | 209  | 229    |           |     |       |
| 200601204 | F   | 48     | Blue  | 196     | 211  | 235    | 215     | 209  | 229    |           |     |       |
| 200601197 | M   | 56     | Blue  | 196     | 211  | 235    | 208     | 209  | 229    |           |     |       |
| 200601198 | M   | 55     | Blue  | 196     | 211  | 235    | 208     | 209  | 229    |           |     |       |
| 200601199 | M   | 57     | Blue  | 196     | 211  | 235    | 208     | 209  | 235    |           |     |       |
| 200601200 | M   | 56     | Blue  | 196     | 211  | 235    | 215     | 209  | 235    |           |     |       |
| 200601201 | M   | 57     | Blue  | 196     | 211  | 235    | 215     | 211  | 229    |           |     |       |

| UNH2139 |         | cski |         | Gm264a |         |
|---------|---------|------|---------|--------|---------|
| 230     | 208 215 | 215  | 209 211 | 235    | 235 229 |
| M 0     | M 0     | M 0  | M 0     | M 2    | M 3     |
| F 4     | F 2     | F 3  | F 4     | F 2    | F 11    |
| 196     | M 3 M 2 | 211  | M 4 M 1 |        |         |
|         | F 3 F 4 |      | F 5 F 1 |        |         |

Fisher's Exact using genotypes of all individuals

|                     |                     |                     |
|---------------------|---------------------|---------------------|
| X <sup>2</sup> 3.88 | X <sup>2</sup> 4.43 | X <sup>2</sup> 1.27 |
| P 0.275             | P 0.219             | P 0.261             |

Fisher's Exact using maternal and paternal alleles

|          |                                 |                                 |                                 |
|----------|---------------------------------|---------------------------------|---------------------------------|
| Maternal | X <sup>2</sup> 3.46<br>P 0.063  | X <sup>2</sup> 4.41<br>P 0.036  | X <sup>2</sup> NI<br>P Homo     |
| Paternal | X <sup>2</sup> 0.055<br>P 0.814 | X <sup>2</sup> 0.554<br>P 0.457 | X <sup>2</sup> 1.270<br>P 0.261 |

| LG 7      |     |        |       |         |         |         |         |         |         |           |     |       |
|-----------|-----|--------|-------|---------|---------|---------|---------|---------|---------|-----------|-----|-------|
| Fish      | Sex | Length | Color | UNH2095 | UNH2086 | UNH2031 | UNH2095 | UNH2086 | UNH2031 | Fish      | Sex | Color |
|           |     |        |       | 126     | 150     | 177     | 139     | 167     | 149     | 200600128 | M   | Blue  |
|           |     |        |       | 169     | 238     | 162     | 175     | 255     | 158     |           |     |       |
| 200601205 | F   | 54     | White |         | 150     | 177     |         | 255     | 158     |           |     |       |
| 200601206 | F   | 52     | White | 169     | 150     | 177     | 175     | 255     | 158     |           |     |       |
| 200601207 | F   | 49     | White | 169     | 238     | 162     | 139     | 167     | 149     |           |     |       |
| 200601208 | F   | 53     | White | 126     | 150     | 162     | 139     | 167     | 149     |           |     |       |
| 200601209 | F   | 52     | White | 126     | 150     | 162     | 139     | 167     | 149     |           |     |       |
| 200601210 | F   | 51     | White | 126     |         | 177     | 139     |         | 149     |           |     |       |
| 200601211 | F   | 49     | White | 126     | 150     |         | 175     |         |         |           |     |       |
| 200601194 | F   | 48     | Blue  | 126     | 150     | 177     | 175     | 255     | 158     |           |     |       |
| 200601195 | F   | 53     | Blue  | 169     | 238     | 162     | 139     | 167     | 149     |           |     |       |
| 200601196 | F   | 50     | Blue  | 169     | 238     | 162     | 139     | 167     | 149     |           |     |       |
| 200601202 | F   | 54     | Blue  | 126     | 150     | 177     | 139     | 167     | 149     |           |     |       |
| 200601203 | F   | 52     | Blue  | 126     | 150     | 177     | 139     | 167     | 149     |           |     |       |
| 200601204 | F   | 48     | Blue  | 126     | 150     | 177     |         | 255     | 158     |           |     |       |
| 200601197 | M   | 56     | Blue  | 126     | 150     | 177     | 175     | 255     | 158     |           |     |       |
| 200601198 | M   | 55     | Blue  | 169     | 238     | 162     | 139     | 167     | 149     |           |     |       |
| 200601199 | M   | 57     | Blue  | 126     | 150     | 177     | 139     | 167     | 149     |           |     |       |
| 200601200 | M   | 56     | Blue  | 169     | 238     | 162     | 175     | 255     | 158     |           |     |       |
| 200601201 | M   | 57     | Blue  | 126     | 150     | 177     | 139     | 167     | 158     |           |     |       |

| UNH2095 |         | UNH2086 |         | UNH2031 |         |
|---------|---------|---------|---------|---------|---------|
| 126     | 139 175 | 150     | 167 255 | 177     | 149 158 |
| M 2     | M 1     | M 2     | M 1     | M 1     | M 2     |
| F 5     | F 2     | F 4     | F 4     | F 3     | F 4     |
| 169     | M 1 M 1 | 238     | M 1 M 1 | 162     | M 1 M 1 |
|         | F 3 F 1 |         | F 3 F 0 |         | F 4 F 0 |

Fisher's Exact using genotypes of all individuals

|                      |                     |                     |
|----------------------|---------------------|---------------------|
| X <sup>2</sup> 0.429 | X <sup>2</sup> 2.58 | X <sup>2</sup> 2.58 |
| P 0.934              | P 0.461             | P 0.461             |

Fisher's Exact using maternal and paternal alleles

|          |                                 |                                 |                                 |
|----------|---------------------------------|---------------------------------|---------------------------------|
| Maternal | X <sup>2</sup> 0.019<br>P 0.889 | X <sup>2</sup> 0.382<br>P 0.536 | X <sup>2</sup> 0.019<br>P 0.889 |
| Paternal | X <sup>2</sup> 0.259<br>P 0.611 | X <sup>2</sup> 0.019<br>P 0.889 | X <sup>2</sup> 0.780<br>P 0.377 |

| UNH2095 |         | UNH2086 |         | UNH2031 |         |
|---------|---------|---------|---------|---------|---------|
| 126     | 139 175 | 150     | 167 255 | 177     | 149 158 |
| M 2     | M 1     | M 2     | M 1     | M 1     | M 2     |
| F 2     | F 1     | F 2     | F 2     | F 2     | F 2     |
| 169     | M 1 M 1 | 238     | M 1 M 1 | 162     | M 1 M 1 |
|         | F 2 F 0 |         | F 2 F 0 |         | F 2 F 0 |

Fisher's Exact using genotypes of blue females and all males

|                     |                     |                     |
|---------------------|---------------------|---------------------|
| X <sup>2</sup> 1.33 | X <sup>2</sup> 1.59 | X <sup>2</sup> 1.59 |
| P 0.721             | P 0.662             | P 0.662             |

Fisher's Exact using maternal and paternal alleles

|          |                                 |                                 |                                 |
|----------|---------------------------------|---------------------------------|---------------------------------|
| Maternal | X <sup>2</sup> 0<br>P 1         | X <sup>2</sup> 0.052<br>P 0.819 | X <sup>2</sup> 0.052<br>P 0.819 |
| Paternal | X <sup>2</sup> 0.476<br>P 0.490 | X <sup>2</sup> 0.052<br>P 0.819 | X <sup>2</sup> 0.782<br>P 0.376 |

S5.2: *Metriacima callanos* family Rmca016 genotypes for LG 5 and LG 7.

**M. callanos**  
Rmca016 Ratio M:F total  
3M : 21F 24 ind

**LG 5**

| Fish      | Sex | Length | Color | UNH2139 | cski | Gm264a |
|-----------|-----|--------|-------|---------|------|--------|
| 200600370 | F   |        | White | 230     | 215  | 235    |
|           |     |        |       | 196     | 209  | 235    |
| 200700614 | F   | 54     | White | 230     | 215  | 235    |
| 200700615 | F   | 54     | White | 230     | 215  | 235    |
| 200700616 | F   | 54     | White | 230     | 215  | 235    |
| 200700617 | F   | 59     | White | 230     | 215  | 235    |
| 200700618 | F   | 58     | White | 230     | 215  | 235    |
| 200700619 | F   | 58     | White | 230     | 215  | 235    |
| 200700620 | F   | 55     | White | 230     | 215  | 235    |
| 200700621 | F   | 55     | White | 230     | 215  | 235    |
| 200700622 | F   | 53     | White | 230     | 215  | 235    |
| 200700624 | F   | 49     | White | 230     | 215  | 235    |
| 200700625 | F   | 48     | White | 230     | 215  | 235    |
| 200700626 | F   | 54     | White | 230     | 215  | 235    |
| 200700627 | F   | 51     | White | 230     | 215  | 235    |
| 200700628 | F   | 52     | White | 230     | 215  | 235    |
| 200700629 | F   | 51     | White | 230     | 215  | 235    |
| 200700630 | F   | 49     | White | 230     | 215  | 235    |
| 200700608 | F   | 59     | Blue  | 196     | 209  | 235    |
| 200700609 | F   | 59     | Blue  | 196     | 209  | 235    |
| 200700612 | F   | 56     | Blue  | 196     | 209  | 235    |
| 200700613 | F   | 52     | Blue  | 196     | 209  | 235    |
| 200700623 | F   | 58     | Blue  | 196     | 215  | 235    |
| 200700607 | M   | 52     | Blue  | 196     | 209  | 235    |
| 200700610 | M   | 59     | Blue  | 196     | 209  | 235    |
| 200700611 | M   | 61     | Blue  | 196     | 209  | 235    |

| UNH2139 |     | cski |     | Gm264a |      |
|---------|-----|------|-----|--------|------|
| 230     | 196 | 215  | 209 | 235    | 229  |
| M 0     | M 0 | M 0  | M 0 | M 1    | M 2  |
| F 9     | F 4 | F 11 | F 6 | F 9    | F 10 |
| M 2     | M 0 | M 1  | M 2 | M 1    | M 2  |
| F 5     | F 0 | F 1  | F 3 | F 9    | F 10 |

Fisher's Exact using genotypes of all individuals

$X^2$  4.13  $X^2$  8.46  $X^2$  0.206  
P 0.127 P 0.037 P 0.65

Fisher's Exact using maternal and paternal alleles

Maternal  $X^2$  4.130  $X^2$  8.330  $X^2$  NI  
P 0.042 P 0.004 P Homo

Paternal  $X^2$  0.556  $X^2$  0.599  $X^2$  0.206  
P 0.456 P 0.439 P 0.650

**LG 5**

| Fish      | Sex    | Length | Color | UNH2139 | cski | Gm264a |
|-----------|--------|--------|-------|---------|------|--------|
| 200600370 | No DNA |        |       | 209     | 209  | 235    |
|           | M      |        |       | 215     | 211  | 229    |
| 200700614 | F      | 54     | White | 209     | 209  | 229    |
| 200700615 | F      | 54     | White | 209     | 209  | 229    |
| 200700616 | F      | 54     | White | 209     | 209  | 229    |
| 200700617 | F      | 59     | White | 209     | 211  | 229    |
| 200700618 | F      | 58     | White | 209     | 209  | 229    |
| 200700619 | F      | 58     | White | 209     | 209  | 229    |
| 200700620 | F      | 55     | White | 209     | 209  | 235    |
| 200700621 | F      | 55     | White | 209     | 209  | 235    |
| 200700622 | F      | 53     | White | 209     | 209  | 229    |
| 200700624 | F      | 49     | White | 209     | 209  | 235    |
| 200700625 | F      | 48     | White | 209     | 209  | 235    |
| 200700626 | F      | 54     | White | 209     | 209  | 235    |
| 200700627 | F      | 51     | White | 209     | 209  | 235    |
| 200700628 | F      | 52     | White | 209     | 209  | 235    |
| 200700629 | F      | 51     | White | 209     | 209  | 235    |
| 200700630 | F      | 49     | White | 209     | 209  | 235    |
| 200700608 | F      | 59     | Blue  | 209     | 211  | 235    |
| 200700609 | F      | 59     | Blue  | 209     | 211  | 235    |
| 200700612 | F      | 56     | Blue  | 209     | 211  | 235    |
| 200700613 | F      | 52     | Blue  | 209     | 209  | 235    |
| 200700623 | F      | 58     | Blue  | 209     | 209  | 235    |
| 200700607 | M      | 52     | Blue  | 209     | 209  | 235    |
| 200700610 | M      | 59     | Blue  | 209     | 211  | 229    |
| 200700611 | M      | 61     | Blue  | 209     | 211  | 229    |

| UNH2095 |     | UNH2086 |     | UNH2031 |     |
|---------|-----|---------|-----|---------|-----|
| 169     | 126 | 150     | 235 | 177     | 150 |
| M 0     | M 0 | M 1     | M 0 | M 1     | M 0 |
| F 4     | F 7 | F 5     | F 6 | F 7     | F 4 |
| M 1     | M 1 | M 0     | M 1 | M 0     | M 1 |
| F 2     | F 5 | F 2     | F 3 | F 3     | F 5 |

**LG 7**

| Fish      | Sex | Length | Color | UNH2095 | UNH2086 | UNH2031 | Fish      | Sex    |
|-----------|-----|--------|-------|---------|---------|---------|-----------|--------|
| 200600370 | F   |        | White | 169     | 150     | 177     | 200600370 | No DNA |
|           |     |        |       | 126     | 235     | 162     |           | M      |
| 200700614 | F   | 54     | White | 169     | 150     | 177     | 200700614 | F      |
| 200700615 | F   | 54     | White | 126     | 150     | 177     | 200700615 | F      |
| 200700616 | F   | 54     | White | 169     | 150     | 177     | 200700616 | F      |
| 200700617 | F   | 59     | White | 126     | 150     | 177     | 200700617 | F      |
| 200700618 | F   | 58     | White | 169     | 235     | 162     | 200700618 | F      |
| 200700619 | F   | 58     | White | 169     | 235     | 162     | 200700619 | F      |
| 200700620 | F   | 55     | White | 169     | 150     | 162     | 200700620 | F      |
| 200700621 | F   | 55     | White | 169     | 235     | 162     | 200700621 | F      |
| 200700622 | F   | 53     | White | 169     | 235     | 162     | 200700622 | F      |
| 200700624 | F   | 49     | White | 126     | 150     | 177     | 200700624 | F      |
| 200700625 | F   | 48     | White | 126     | 150     | 177     | 200700625 | F      |
| 200700626 | F   | 54     | White | 126     | 150     | 177     | 200700626 | F      |
| 200700627 | F   | 51     | White | 169     | 235     | 162     | 200700627 | F      |
| 200700628 | F   | 52     | White | 169     | 235     | 162     | 200700628 | F      |
| 200700629 | F   | 51     | White | 169     | 235     | 162     | 200700629 | F      |
| 200700630 | F   | 49     | White | 169     | 150     | 177     | 200700630 | F      |
| 200700608 | F   | 59     | Blue  | 126     | 150     | 177     | 200700608 | F      |
| 200700609 | F   | 59     | Blue  | 126     | 150     | 177     | 200700609 | F      |
| 200700612 | F   | 56     | Blue  | 126     | 150     | 177     | 200700612 | F      |
| 200700613 | F   | 52     | Blue  | 169     | 150     | 177     | 200700613 | F      |
| 200700623 | F   | 58     | Blue  | 126     | 150     | 177     | 200700623 | F      |
| 200700607 | M   | 52     | Blue  | 126     | 150     | 177     | 200700607 | M      |
| 200700610 | M   | 59     | Blue  | 126     | 235     | 162     | 200700610 | M      |
| 200700611 | M   | 61     | Blue  | 126     | 150     | 177     | 200700611 | M      |

| UNH2095 |     | UNH2086 |     | UNH2031 |     |
|---------|-----|---------|-----|---------|-----|
| 169     | 126 | 150     | 235 | 177     | 150 |
| M 0     | M 0 | M 1     | M 0 | M 1     | M 0 |
| F 4     | F 7 | F 5     | F 6 | F 7     | F 4 |
| M 1     | M 1 | M 0     | M 1 | M 0     | M 1 |
| F 2     | F 5 | F 2     | F 3 | F 3     | F 5 |

Fisher's Exact using genotypes of all individuals

$X^2$  3.33  $X^2$  1.97  $X^2$  1.17  
P 0.343 P 0.579 P 0.759

Fisher's Exact using maternal and paternal alleles

Maternal  $X^2$  2.200  $X^2$  0.423  $X^2$  0.046  
P 0.138 P 0.515 P 0.830

Paternal  $X^2$  0.200  $X^2$  0.093  $X^2$  0.005  
P 0.639 P 0.761 P 0.943

| UNH2095 |     | UNH2086 |     | UNH2031 |     |
|---------|-----|---------|-----|---------|-----|
| 169     | 126 | 150     | 235 | 177     | 150 |
| M 0     | M 0 | M 1     | M 0 | M 1     | M 0 |
| F 1     | F 0 | F 3     | F 2 | F 3     | F 2 |
| M 1     | M 1 | M 0     | M 1 | M 0     | M 1 |
| F 2     | F 2 | F 0     | F 0 | F 0     | F 0 |

Fisher's Exact using genotypes of blue females and all males

$X^2$  0.467  $X^2$  3.32  $X^2$  3.32  
P 0.792 P 0.19 P 0.19

Fisher's Exact using maternal and paternal alleles

Maternal  $X^2$  0.467  $X^2$  2.920  $X^2$  2.920  
P 0.495 P 0.088 P 0.088

Paternal  $X^2$  0.058  $X^2$  0.058  $X^2$  0.058  
P 0.809 P 0.809 P 0.809

S6.1: *Metriaclima 'dakarti'* family 005 genotypes for LG 5 and LG 7.

**M. 'dakarti'**  
**Psda005** Ratio M:F total  
 6M : 5F 14 ind  
 3 Unkown

| LG 5       |      |        |         |      |        | LG 7 |     |        |         |         |         |      |      |     |
|------------|------|--------|---------|------|--------|------|-----|--------|---------|---------|---------|------|------|-----|
| Fish       | Sex  | Length | UNH2139 | cski | GM264A | Fish | Sex | Length | UNH2095 | UNH2086 | UNH2031 | Fish | Sex  |     |
| 2006000057 | F    |        | 224     | 221  | 206    | 224  | 221 | 206    | 120     | 131     | 158     | 120  | 161  | 170 |
|            |      |        | 171     | 215  | 221    | 208  | 211 | 221    | 120     | 145     | 184     | 120  | 131  | 158 |
| 200600585  | F    | 52     | 224     | 221  |        | 224  | 221 |        | 120     | 131     | 158     | 120  | 131  | 158 |
| 200600587  | F    | 52     | 171     | 215  | 221    | 224  | 221 | 206    | 120     | 145     | 184     | 120  | 131  | 158 |
| 200600588  | F    | 50     | 171     | 215  | 221    | 224  | 221 | 221    | 120     | 131     | 158     | 120  | 131  | 158 |
| 200600597  | F    | 53     | 171     | 215  | 221    | 224  | 221 | 206    | 120     | 131     | 158     | 120  | 131  | 158 |
| 200600591  | F    | 52     | 171     | 215  | 206    | 224  | 221 | 206    | 120     | 145     | 184     | 120  | 131  | 158 |
| 200600589  | M    | 56     | 224     | 221  | 206    | 224  | 221 | 206    | 120     | 131     | 158     | 120  | 161  | 170 |
| 200600592  | M    | 62     | 210     | 221  | 206    | 210  | 211 | 221    | 120     | 145     | 184     | 120  | 131  | 170 |
| 200600593  | M    | 59     | 224     | 221  | 206    | 224  | 221 | 206    | 120     | 145     | 184     | 120  | 161  | 170 |
| 200600594  | M    | 52     | 224     | 221  | 221    | 208  | 211 | 206    | 120     | 131     | 158     | 120  | 161  | 170 |
| 200600595  | M    | 60     | 171     | 221  | 221    | 208  | 211 | 206    | 120     | 145     | 184     | 120  | 161  | 170 |
| 200600596  | M    | 55     | 224     | 221  | 221    | 208  | 211 | 221    | 120     | 131     |         | 120  | 161  |     |
| 200600590  | ?(M) | 59     | 171     | 215  | 206    | 224  | 221 | 206    | 120     | 145     | 184     | 120  |      | 170 |
| 200600584  | ?    | 36     | 224     | 215  | 221    | 208  | 221 | 206    | 120     | 131     | 158     | 120  | 152? | 170 |
| 200600586  | ?    | 59     | 224     | 221  | 221    | 224  | 221 | 206    | 120     | 131     | 158     | 120  | 131  | 158 |

| UNH2139 | cski |
|---------|------|
| 224     | 221  |
| M 3     | M 2  |
| F 1     | F 0  |
| Un 1    | Un 1 |
| 171     | 215  |
| M 1     | M 1  |
| F 4     | F 0  |
| Un 1    |      |

| GM264A |
|--------|
| 206    |
| M 2    |
| F 1    |
| Un 1   |
| 221    |
| M 3    |
| F 2    |
| Un 2   |

| UNH2095 | UNH2086 |
|---------|---------|
| 120     | 131     |
| M 6     | M 3     |
| F 5     | F 0     |
| Un 2    | Un 1    |
|         | 145     |
|         | M 2     |
|         | F 0     |

| UNH2031 |
|---------|
| 158     |
| M 2     |
| F 0     |
| Un 1    |
| 184     |
| M 3     |
| F 0     |
| Un 1    |

Fisher's Exact using genotypes of all individuals

X<sup>2</sup> 5.62 P 0.131 X<sup>2</sup> 5.97 P 0.051

Fisher's Exact using maternal and paternal alleles

Maternal X<sup>2</sup> 3.600 P 0.058 X<sup>2</sup> 7.540 P 0.006  
 Paternal X<sup>2</sup> 4.290 P 0.038 X<sup>2</sup> 5.240 P 0.022

Fisher's Exact using genotypes of all individuals

X<sup>2</sup> 0 P 1 X<sup>2</sup> 8.31 P 0.04 X<sup>2</sup> 10 P 0.019

Fisher's Exact using maternal and paternal alleles

Maternal X<sup>2</sup> NI P Homo X<sup>2</sup> 0.110 P 0.740 X<sup>2</sup> 0.400 P 0.527  
 Paternal X<sup>2</sup> NI P Homo X<sup>2</sup> 7.640 P 0.006 X<sup>2</sup> 10.00 P 0.002

1  
2  
3  
4  
5  
6  
7  
8  
9  
10  
11  
12  
13  
14  
15  
16  
17  
18  
19  
20  
21  
22  
23  
24  
25  
26  
27  
28  
29  
30  
31  
32  
33  
34  
35  
36  
37  
38  
39  
40  
41  
42  
43  
44  
45  
46  
47  
48  
49

S7.1: *Metriclisma fainzilberi* Lundo Island family A002 genotypes for LG 5 and LG 7.

**M. fainzilberi Lundo\_Is** Ratio M:F total  
**MeFaLI-A002** 5M : 12F 17 ind

| LG 5   |     |        |       |         |      |        |         |      |        |        |     |       |
|--------|-----|--------|-------|---------|------|--------|---------|------|--------|--------|-----|-------|
| Fish   | Sex | Length | Color | UNH2139 | cski | GM264A | UNH2139 | cski | GM264A | Fish   | Sex | Color |
| 04L-85 | F   |        | OB    | 225     | 209  | 233    | 190     | 219  | 221    | 04L-95 | M   | BB    |
|        |     |        |       | 202     | 211  | 213    | 221     | 213  | 201    |        |     |       |
| 04L-59 | F   | 59     | OB    | 225     | 209  | 233    | 221     | 213  | 201    |        |     |       |
| 04L-60 | F   | 53     | OB    | 225     | 209  | 233    | 221     | 213  | 201    |        |     |       |
| 04L-62 | F   | 42     | OB    | 225     | 209  | 233    | 190     | 219  | 221    |        |     |       |
| 04L-64 | F   | 43     | OB    | 225     | 209  | 233    | 190     | 219  | 221    |        |     |       |
| 04L-66 | F   | 53     | OB    | 225     | 209  | 233    | 190     | 219  | 221    |        |     |       |
| 04L-68 | F   | 69     | OB    | 225     | 209  | 233    | 190     | 219  | 221    |        |     |       |
| 04L-69 | F   | 56     | OB    | 225     | 209  | 233    | 190     | 219  | 221    |        |     |       |
| 04L-70 | F   | 47     | OB    | 225     | 209  | 233    | 190     | 219  | 221    |        |     |       |
| 04L-71 | F   | 54     | OB    | 225     | 209  | 233    | 221     | 213  | 201    |        |     |       |
| 04L-72 | F   | 49     | OB    | 225     | 209  | 233    | 221     | 213  | 201    |        |     |       |
| 04L-73 | F   | 56     | OB    | 225     | 209  | 233    | 221     | 219  | 221    |        |     |       |
| 04L-65 | F   | 55     | BB    | 202     | 211  | 213    | 190     | 213  | 201    |        |     |       |
| 04L-57 | M   | 74     | BB    | 202     | 209  | 213    | 221     | 213  | 201    |        |     |       |
| 04L-58 | M   | 65     | BB    | 202     | 211  | 213    | 190     | 213  | 201    |        |     |       |
| 04L-61 | M   | 63     | BB    | 225     | 211  | 213    | 190     | 219  | 221    |        |     |       |
| 04L-63 | M   | 66     | BB    | 202     | 211  | 213    | 221     | 213  | 201    |        |     |       |
| 04L-67 | M   | 60     | BB    | 202     | 211  | 213    | 190     | 219  | 221    |        |     |       |

| UNH2139 |            | cski       |            |
|---------|------------|------------|------------|
| 190     | 221        | 219        | 213        |
| 202     | M 2<br>F 1 | M 2<br>F 0 | M 2<br>F 1 |
| 225     | M 1<br>F 6 | M 0<br>F 5 | M 1<br>F 4 |

| GM264A |            |
|--------|------------|
| 221    | 201        |
| 213    | M 2<br>F 0 |
| 233    | M 0<br>F 7 |

Fisher's Exact using genotypes of all individuals

|                       |                       |                       |
|-----------------------|-----------------------|-----------------------|
| $X^2$ 9.66<br>P 0.022 | $X^2$ 9.94<br>P 0.019 | $X^2$ 13.4<br>P 0.004 |
|-----------------------|-----------------------|-----------------------|

Fisher's Exact using maternal and paternal alleles

|                                 |                        |                          |
|---------------------------------|------------------------|--------------------------|
| Maternal $X^2$ 8.730<br>P 0.003 | $X^2$ 8.730<br>P 0.003 | $X^2$ 13.000<br>P <.0001 |
| Paternal $X^2$ 0.004<br>P 0.949 | $X^2$ 0.476<br>P 0.490 | $X^2$ 0.476<br>P 0.490   |

| LG 7   |     |        |       |         |         |         |         |         |         |        |     |       |
|--------|-----|--------|-------|---------|---------|---------|---------|---------|---------|--------|-----|-------|
| Fish   | Sex | Length | Color | UNH2095 | UNH2086 | UNH2031 | UNH2095 | UNH2086 | UNH2031 | Fish   | Sex | Color |
| 04L-85 | F   |        | OB    | 129     | 235     | 146     | 111     | 153     | 121     | 04L-95 | M   | BB    |
|        |     |        |       | 145     | 167     | 164     | 143     | 169     | 131     |        |     |       |
| 04L-59 | F   | 59     | OB    | 129     | 235     | 146     | 111     | 153     | 121     |        |     |       |
| 04L-60 | F   | 53     | OB    | 129     | 235     | 146     | 111     | 153     | 121     |        |     |       |
| 04L-62 | F   | 42     | OB    | 129     | 235     | 146     | 111     | 153     | 121     |        |     |       |
| 04L-64 | F   | 43     | OB    | 129     | 235     | 146     | 143     | 169     | 131     |        |     |       |
| 04L-66 | F   | 53     | OB    | 129     | 167     | 164     | 143     | 169     | 131     |        |     |       |
| 04L-68 | F   | 69     | OB    | 129     | 235     | 164     | 143     | 169     | 131     |        |     |       |
| 04L-69 | F   | 56     | OB    | 129     | 235     | 146     | 111     | 153     | 121     |        |     |       |
| 04L-70 | F   | 47     | OB    | 129     | 235     | 146     | 143     | 169     | 131     |        |     |       |
| 04L-71 | F   | 54     | OB    | 129     | 235     | 146     | 111     | 153     | 121     |        |     |       |
| 04L-72 | F   | 49     | OB    | 145     | 167     | 146     | 111     | 169     | 131     |        |     |       |
| 04L-73 | F   | 56     | OB    | 129     | 235     | 146     | 111     | 153     | 121     |        |     |       |
| 04L-65 | F   | 55     | BB    | 129     | 235     | 146     | 111     | 153     | 121     |        |     |       |
| 04L-63 | M   | 66     | BB    | 145     | 167     | 164     | 111     | 153     | 121     |        |     |       |
| 04L-57 | M   | 74     | BB    | 129     | 235     | 146     | 143     | 169     | 131     |        |     |       |
| 04L-58 | M   | 65     | BB    | 129     | 235     | 146     | 111     | 153     | 121     |        |     |       |
| 04L-61 | M   | 63     | BB    | 145     | 167     | 164     | 111     | 153     | 121     |        |     |       |
| 04L-67 | M   | 60     | BB    | 129     | 235     | 146     | 143     | 169     | 121     |        |     |       |

| UNH2095 |            | UNH2086    |            |
|---------|------------|------------|------------|
| 111     | 143        | 153        | 169        |
| 129     | M 1<br>F 1 | M 1<br>F 7 | M 2<br>F 3 |
| 145     | M 2<br>F 1 | M 0<br>F 0 | M 0<br>F 2 |

| UNH2031 |            |
|---------|------------|
| 121     | 131        |
| 146     | M 3<br>F 0 |
| 164     | M 1<br>F 0 |

Fisher's Exact using genotypes of all individuals

|                       |                       |                       |
|-----------------------|-----------------------|-----------------------|
| $X^2$ 3.15<br>P 0.207 | $X^2$ 7.01<br>P 0.072 | $X^2$ 3.27<br>P 0.351 |
|-----------------------|-----------------------|-----------------------|

Fisher's Exact using maternal and paternal alleles

|                                 |                        |                        |
|---------------------------------|------------------------|------------------------|
| Maternal $X^2$ 2.440<br>P 0.119 | $X^2$ 1.070<br>P 0.301 | $X^2$ 0.027<br>P 0.870 |
| Paternal $X^2$ 0.069<br>P 0.793 | $X^2$ 0.004<br>P 0.949 | $X^2$ 0.726<br>P 0.394 |

| UNH2095 |            | UNH2086    |            |
|---------|------------|------------|------------|
| 111     | 143        | 153        | 169        |
| 129     | M 1<br>F 1 | M 1<br>F 7 | M 2<br>F 3 |
| 145     | M 2<br>F 0 | M 0<br>F 0 | M 0<br>F 0 |

| UNH2031 |            |
|---------|------------|
| 121     | 131        |
| 146     | M 3<br>F 0 |
| 164     | M 1<br>F 0 |

Fisher's Exact using genotypes of BB females and all males

|                      |                      |                      |
|----------------------|----------------------|----------------------|
| $X^2$ 2.4<br>P 0.301 | $X^2$ 2.4<br>P 0.301 | $X^2$ 0.6<br>P 0.741 |
|----------------------|----------------------|----------------------|

Fisher's Exact using maternal and paternal alleles

|                                 |                        |                        |
|---------------------------------|------------------------|------------------------|
| Maternal $X^2$ 0.600<br>P 0.439 | $X^2$ 0.600<br>P 0.439 | $X^2$ 0.240<br>P 0.642 |
| Paternal $X^2$ 0.600<br>P 0.439 | $X^2$ 0.600<br>P 0.439 | $X^2$ 0.240<br>P 0.624 |

S7.2: *Metricolima fainizilberi* Lundo Island family RmFI010 genotypes for LG 5 and LG 7.

**M. fainizilberi Lundo Is RmFI010** Ratio M:F total 1M : 25F 28 ind 2 Unknown

Table with columns: Fish, Sex, Length, Color, UNH2139, cski, Gm264a, UNH2139, cski, Gm264a, Fish, Sex, Color. Rows list individual fish with their genotypes for LG 5.

Summary tables for UNH2139, cski, and Gm264a genotypes, showing counts for M, F, and Un categories.

Fisher's Exact using genotypes of all individuals. X^2 1.42 P 0.701, X^2 2.34 P 0.505, X^2 2.62 P 0.453

Table with columns: Fish, Sex, Length, Color, UNH2095, UNH2086, UNH2031, UNH2095, UNH2086, UNH2031, Fish, Sex, Color. Rows list individual fish with their genotypes for LG 7.

Summary tables for UNH2095, UNH2086, and UNH2031 genotypes, showing counts for M, F, and Un categories.

Fisher's Exact using genotypes of all individuals. X^2 3.3 P 0.348, X^2 1.13 P 0.288, X^2 2.82 P 0.42

Summary tables for UNH2095, UNH2086, and UNH2031 genotypes, showing counts for M, F, and Un categories.

Fisher's Exact using genotypes of BB females and all males. X^2 4.29 P 0.232, X^2 0.938 P 0.333, X^2 4.62 P 0.202

S8.1: *Metriaclima fainzilberi* Lundo Point family A001 genotypes for LG 5 and LG 7.

**M. fainzilberi Lundo Pt. MeFaLP-A001** Ratio M:F total  
1M : 21F 22 ind

| LG 5    |     |        |       |         |      |        |         |      |        |
|---------|-----|--------|-------|---------|------|--------|---------|------|--------|
| Fish    | Sex | Length | Color | UNH2139 | cski | GM264A | UNH2139 | cski | GM264A |
| 05L-083 | F   |        | OB    | 169     | 209  | 217    | 182     | 217  | 224    |
|         |     |        |       | 229     | 217  | 225    | 182     | 217  | 221    |
| 05L-065 | F   | 55     | OB    | 198     | 209  | 225    | 182     | 217  | 224    |
| 05L-066 | F   | 64     | OB    | 198     | 209  | 225    | 182     | 217  | 224    |
| 05L-068 | F   | 62     | OB    | 169     | 209  | 217    | 182     | 217  | 224    |
| 05L-069 | F   | 54     | OB    | 169     | 209  | 217    | 182     | 217  | 224    |
| 05L-070 | F   | 51     | OB    | 169     | 209  | 217    | 182     | 217  | 224    |
| 05L-071 | F   | 49     | OB    | 169     | 209  | 217    | 182     | 217  | 224    |
| 05L-072 | F   | 49     | OB    | 169     | 209  | 217    | 182     | 217  | 224    |
| 05L-073 | F   | 59     | OB    | 169     | 209  | 217    | 182     | 217  | 224    |
| 05L-074 | F   | 54     | OB    | 169     | 209  | 225    | 182     | 217  | 221    |
| 05L-075 | F   | 52     | OB    | 169     | 209  | 217    | 182     | 217  | 221    |
| 05L-067 | F   | 57     | BB    | 229     | 217  | 225    | 182     | 217  | 224    |
| 05L-076 | F   | 66     | BB    | 229     | 217  | 225    | 182     | 217  | 221    |
| 05L-077 | F   | 57     | BB    | 229     | 217  | 225    | 182     | 217  | 221    |
| 05L-078 | F   | 62     | BB    | 229     | 217  | 225    | 182     | 217  | 224    |
| 05L-079 | F   | 56     | BB    | 229     | 217  | 225    | 182     | 217  | 224    |
| 05L-080 | F   | 55     | BB    | 229     | 217  | 225    | 182     | 217  | 224    |
| 05L-081 | F   | 55     | BB    | 229     | 217  | 217    | 182     | 217  | 224    |
| 05L-082 | F   | 61     | BB    | 229     | 217  | 225    | 182     | 217  | 221    |
| 05L-083 | F   | 60     | BB    | 229     | 217  | 225    | 182     | 217  | 224    |
| 05L-084 | F   | 61     | BB    | 229     | 217  | 225    | 182     | 217  | 221    |
| 05L-085 | F   | 55     | BB    | 229     | 217  | 225    | 182     | 217  | 221    |
| 05L-086 | M   | NR     | BB    | 229     | 217  | 217    | 182     | 217  | 224    |

| LG 7    |     |        |       |         |         |         |         |         |         |         |     |       |
|---------|-----|--------|-------|---------|---------|---------|---------|---------|---------|---------|-----|-------|
| Fish    | Sex | Length | Color | UNH2095 | UNH2086 | UNH2031 | UNH2095 | UNH2086 | UNH2031 | Fish    | Sex | Color |
| 05L-083 | F   |        | OB    | 140     | 164     | 189     | 134     | 164     | 124     | 05L-084 | M   | BB    |
|         |     |        |       | 104     | 153     | 135     | 120     | 149     | 142     |         |     |       |
| 05L-065 | F   | 55     | OB    | 129     | 153     | 189     | 134     | 164     | 124     |         |     |       |
| 05L-066 | F   | 64     | OB    | 140     | 164     | 189     | 134     | 164     | 124     |         |     |       |
| 05L-068 | F   | 62     | OB    | 104     | 153     | 135     | 120     | 149     | 142     |         |     |       |
| 05L-069 | F   | 54     | OB    | 140     | 164     | 189     | 134     | 164     | 124     |         |     |       |
| 05L-070 | F   | 51     | OB    | 140     | 153     | 135     | 120     | 149     | 142     |         |     |       |
| 05L-071 | F   | 49     | OB    | 140     | 153     | 189     | 120     | 164     | 142     |         |     |       |
| 05L-072 | F   | 49     | OB    | 104     | 153     | 135     | 120     | 149     | 142     |         |     |       |
| 05L-073 | F   | 59     | OB    | 104     | 153     | 135     | 134     | 149     | 124     |         |     |       |
| 05L-074 | F   | 54     | OB    | 140     | 164     | 189     | 134     | 149     | 142     |         |     |       |
| 05L-075 | F   | 52     | OB    | 140     | 164     | 189     | 134     | 164     | 124     |         |     |       |
| 05L-067 | F   | 57     | BB    | 104     | 153     | 135     | 134     | 149     | 124     |         |     |       |
| 05L-076 | F   | 66     | BB    | 140     | 164     | 189     | 134     | 164     | 124     |         |     |       |
| 05L-077 | F   | 57     | BB    | 104     | 153     | 135     | 134     | 149     | 124     |         |     |       |
| 05L-078 | F   | 62     | BB    | 140     | 164     | 189     | 120     | 149     | 142     |         |     |       |
| 05L-079 | F   | 56     | BB    | 104     | 153     | 135     | 134     | 149     | 124     |         |     |       |
| 05L-080 | F   | 55     | BB    | 104     | 153     | 135     | 120     | 149     | 142     |         |     |       |
| 05L-081 | F   | 55     | BB    | 104     | 153     | 135     | 120     | 149     | 142     |         |     |       |
| 05L-082 | F   | 61     | BB    | 140     | 164     | 189     | 134     | 164     | 124     |         |     |       |
| 05L-083 | F   | 60     | BB    | 140     | 164     | 189     | 134     | 164     | 124     |         |     |       |
| 05L-084 | F   | 61     | BB    | 140     | 164     | 189     | 120     | 149     | 142     |         |     |       |
| 05L-085 | F   | 55     | BB    | 140     | 164     | 135     | 120     | 164     | 142     |         |     |       |
| 05L-086 | M   | NR     | BB    | 140     | 189     | 189     | 134     | 164     | 124     |         |     |       |

| UNH2139 | cski | GM264A |
|---------|------|--------|
| 169     | 209  | 217    |
| 229     | 217  | 225    |

| UNH2095 | UNH2086 | UNH2031 |
|---------|---------|---------|
| 140     | 164     | 189     |
| 104     | 153     | 135     |

Fisher's Exact using genotypes of all individuals

Fisher's Exact using genotypes of all individuals

$\chi^2$  9 P 0.003       $\chi^2$  11 P 0.001       $\chi^2$  0.476 P 0.788

$\chi^2$  1.58 P 0.664       $\chi^2$  0 P 1       $\chi^2$  2.1 P 0.552

| UNH2095 | UNH2086 | UNH2031 |
|---------|---------|---------|
| 140     | 164     | 189     |
| 104     | 153     | 135     |

Fisher's Exact using genotypes of BB females and all males

$\chi^2$  2.18 P 0.536       $\chi^2$  0 P 1       $\chi^2$  2.18 P 0.536

1  
2  
3  
4  
5  
6  
7  
8  
9  
10  
11  
12  
13  
14  
15  
16  
17  
18  
19  
20  
21  
22  
23  
24  
25  
26  
27  
28  
29  
30  
31  
32  
33  
34  
35  
36  
37  
38  
39  
40  
41  
42  
43  
44  
45  
46  
47  
48  
49



1  
2  
3  
4  
5  
6  
7  
8  
9  
10  
11  
12  
13  
14  
15  
16  
17  
18  
19  
20  
21  
22  
23  
24  
25  
26  
27  
28  
29  
30  
31  
32  
33  
34  
35  
36  
37  
38  
39  
40  
41  
42  
43  
44  
45  
46  
47  
48  
49

S8.2: *Metriacima fainzilberii* Lundo Point family A003 genotypes for LG 5 and LG 7.

**M. fainzilberii** Lundo Pt.  
MeFaLP-A003 Ratio M:F total  
2M : 19F 22 ind

LG 5

| Fish      | Sex | Length | Color | UNH2139    | cski       | Gm264a     | UNH2139    | cski       | Gm264a     | Fish      | Sex | Color |    |
|-----------|-----|--------|-------|------------|------------|------------|------------|------------|------------|-----------|-----|-------|----|
| 200600366 | F   |        | BB    | 230<br>181 | 215<br>215 | 223<br>223 | 230<br>181 | 215<br>215 | 223<br>219 | 200600168 | M   | BB    |    |
| 200601403 | F   | 48     | BB    | 181        | 215        | 223        | 230        | 215        | 223        | 200601403 | F   | 48    | BB |
| 200601404 | F   | 49     | BB    | 181        | 215        | 223        | 230        | 215        | 223        | 200601404 | F   | 49    | BB |
| 200601405 | F   | 47     | BB    | 230        | 215        | 223        | 181        | 215        | 223        | 200601405 | F   | 47    | BB |
| 200601406 | F   | 48     | BB    | 230        | 215        | 223        | 181        | 215        | 219        | 200601406 | F   | 48    | BB |
| 200601408 | F   | 44     | BB    | 230        | 215        | 223        | 181        | 215        | 223        | 200601408 | F   | 44    | BB |
| 200601410 | F   | 44     | BB    | 181        | 215        | 223        | 230        | 215        | 219        | 200601410 | F   | 44    | BB |
| 200601411 | F   | 49     | BB    | 230        | 215        | 223        | 181        | 215        | 223        | 200601411 | F   | 49    | BB |
| 200601412 | F   | 48     | BB    | 181        | 215        | 223        | 181        | 215        | 219        | 200601412 | F   | 48    | BB |
| 200601414 | F   | 52     | BB    | 230        | 215        | 223        | 230        | 215        | 223        | 200601414 | F   | 52    | BB |
| 200601415 | F   | 44     | BB    | 181        | 215        | 223        | 230        | 215        | 223        | 200601415 | F   | 44    | BB |
| 200601416 | F   | 52     | BB    | 181        | 215        | 223        | 181        | 215        | 223        | 200601416 | F   | 52    | BB |
| 200601417 | F   | 48     | BB    | 181        | 215        | 223        | 181        | 215        | 219        | 200601417 | F   | 48    | BB |
| 200601418 | F   | 45     | BB    | 181        | 215        | 223        | 230        | 215        | 219        | 200601418 | F   | 45    | BB |
| 200601419 | F   | 48     | BB    | 230        | 215        | 223        | 181        | 215        | 223        | 200601419 | F   | 48    | BB |
| 200601420 | F   | 52     | BB    | 181        | 215        | 223        | 181        | 215        | 219        | 200601420 | F   | 52    | BB |
| 200601421 | F   | 50     | BB    | 230        | 215        | 223        | 181        | 215        | 223        | 200601421 | F   | 50    | BB |
| 200601422 | F   | 47     | BB    | 181        | 215        | 223        | 230        | 215        | 219        | 200601422 | F   | 47    | BB |
| 200601423 | F   | 45     | BB    | 230        | 215        | 223        | 230        | 215        | 223        | 200601423 | F   | 45    | BB |
| 200601424 | F   | 43     | BB    | 230        | 215        | 223        | 230        | 215        | 223        | 200601424 | F   | 43    | BB |
| 200601409 | M   | 54     | BB    | 181        | 215        | 223        | 181        | 215        | 219        | 200601409 | M   | 54    | BB |
| 200601413 | M   | 51     | BB    | 181        | 215        | 223        | 230        | 215        | 223        | 200601413 | M   | 51    | BB |
| 200601407 | ?   | 49     | BB    | 181        | 215        | 223        | 230        | 215        | 223        | 200601407 | ?   | 49    | BB |

UNH2139

|     |      |     |
|-----|------|-----|
| 230 | 230  | 181 |
| M 0 | M 1  |     |
| F 3 | F 12 |     |
|     | Un 1 |     |

cski

|     |      |
|-----|------|
| 215 | 215  |
| M 2 | F 19 |
|     | Un 1 |

Gm264a

|      |     |
|------|-----|
| 223  | 219 |
| M 1  | M 1 |
| F 11 | F 7 |
| Un 1 |     |

Fisher's Exact using genotypes of all individuals

X<sup>2</sup> 2.65  
P 0.265

X<sup>2</sup> 0  
P 1

X<sup>2</sup> 0.0926  
P 0.761

LG 7

| Fish      | Sex | Length | Color | UNH2095    | UNH2086    | UNH2031    | UNH2095    | UNH2086    | UNH2031    | Fish      | Sex | Color |    |
|-----------|-----|--------|-------|------------|------------|------------|------------|------------|------------|-----------|-----|-------|----|
| 200600366 | F   |        | BB    | 140<br>133 | 161<br>161 | 122<br>189 | 140<br>133 | 161<br>161 | 122<br>189 | 200600168 | M   | BB    |    |
| 200601403 | F   | 48     | BB    | 140        | 161        | 189        | 140        | 161        | 122        | 200601403 | F   | 48    | BB |
| 200601404 | F   | 49     | BB    | 133        | 161        | 122        | 140        | 161        | 189        | 200601404 | F   | 49    | BB |
| 200601405 | F   | 47     | BB    | 140        | 161        | 189        | 133        | 161        | 122        | 200601405 | F   | 47    | BB |
| 200601406 | F   | 48     | BB    | 133        | 161        | 122        | 133        | 161        | 122        | 200601406 | F   | 48    | BB |
| 200601408 | F   | 44     | BB    | 133        | 161        | 122        | 133        | 161        | 122        | 200601408 | F   | 44    | BB |
| 200601410 | F   | 44     | BB    | 140        | 161        | 122        | 133        | 161        | 122        | 200601410 | F   | 44    | BB |
| 200601411 | F   | 49     | BB    | 133        | 161        | 189        | 140        | 161        | 122        | 200601411 | F   | 49    | BB |
| 200601412 | F   | 48     | BB    | 140        | 161        | 122        | 140        | 161        | 189        | 200601412 | F   | 48    | BB |
| 200601414 | F   | 52     | BB    | 140        | 161        | 189        | 140        | 161        | 189        | 200601414 | F   | 52    | BB |
| 200601415 | F   | 44     | BB    | 140        | 161        | 122        | 133        | 161        | 189        | 200601415 | F   | 44    | BB |
| 200601416 | F   | 52     | BB    | 133        | 161        | 122        | 140        | 161        | 189        | 200601416 | F   | 52    | BB |
| 200601417 | F   | 48     | BB    | 133        | 161        | 122        | 133        | 161        | 122        | 200601417 | F   | 48    | BB |
| 200601418 | F   | 45     | BB    | 133        | 161        | 189        | 140        | 161        | 122        | 200601418 | F   | 45    | BB |
| 200601419 | F   | 48     | BB    | 140        | 161        | 122        | 133        | 161        | 189        | 200601419 | F   | 48    | BB |
| 200601420 | F   | 52     | BB    | 133        | 161        | 189        | 140        | 161        | 122        | 200601420 | F   | 52    | BB |
| 200601421 | F   | 50     | BB    | 140        | 161        | 122        | 133        | 161        | 189        | 200601421 | F   | 50    | BB |
| 200601422 | F   | 47     | BB    | 133        | 161        | 122        | 140        | 161        | 189        | 200601422 | F   | 47    | BB |
| 200601423 | F   | 45     | BB    | 140        | 161        | 189        | 140        | 161        | 189        | 200601423 | F   | 45    | BB |
| 200601424 | F   | 43     | BB    | 140        | 161        | 122        | 140        | 161        | 189        | 200601424 | F   | 43    | BB |
| 200601409 | M   | 54     | BB    | 132        | 161        | 189        | 140        | 161        | 122        | 200601409 | M   | 54    | BB |
| 200601413 | M   | 51     | BB    | 133        | 161        | 122        | 133        | 161        | 122        | 200601413 | M   | 51    | BB |
| 200601407 | ?   | 49     | BB    | 140        | 161        | 122        | 140        | 161        | 189        | 200601407 | ?   | 49    | BB |

UNH2095

|      |      |
|------|------|
| 140  | 133  |
| M 0  | M 1  |
| F 5  | F 11 |
| Un 1 |      |

UNH2086

|     |      |
|-----|------|
| 161 | 161  |
| M 2 | F 19 |
|     | Un 1 |

UNH2031

|     |      |     |
|-----|------|-----|
| 189 | 189  | 122 |
| M 0 | M 1  |     |
| F 2 | F 13 |     |
|     | Un 1 |     |

122

|  |     |
|--|-----|
|  | M 1 |
|  | F 4 |

Fisher's Exact using genotypes of all individuals

X<sup>2</sup> 1.66  
P 0.437

X<sup>2</sup> 0  
P 1

X<sup>2</sup> 0.939  
P 0.625

S9.1 : *Metriaclima* 'kompakt' family A001 genotypes for LG 5 and LG 7.

**M. 'kompakt'**  
**MebINA-A001** Ratio M:F total  
 10M: 13 F 24 ind  
 1 Unknown

| LG 5   |      |        |       |         |      |        |         |      |        |        |     |       |
|--------|------|--------|-------|---------|------|--------|---------|------|--------|--------|-----|-------|
| Fish   | Sex  | Length | Color | UNH2139 | cski | GM264A | UNH2139 | cski | GM264A | Fish   | Sex | Color |
| 04L-75 | F    |        | OB    | 191     | 208  | 205    | 167     | 218  | 205    | No DNA | M   | BB    |
|        |      |        |       | 167     | 218  | 233    | 218     | 226  | 209    |        |     |       |
| 04-96  | F    | 70     | OB    | 191     | 208  | 205    | 167     | 218  | 205    |        |     |       |
| 04-98  | F    | 65     | OB    | 191     | 208  | 205    | 218     | 226  | 209    |        |     |       |
| 04-99  | F    | 66     | OB    | 191     | 208  | 205    | 218     | 226  | 209    |        |     |       |
| 04-100 | F    | 62     | OB    | 191     | 208  | 205    | 218     | 226  | 209    |        |     |       |
| 04-101 | F    | 65     | OB    | 191     | 208  | 205    | 167     | 218  | 205    |        |     |       |
| 04-107 | F    | 64     | OB    | 191     | 208  | 205    | 167     | 218  | 205    |        |     |       |
| 04-109 | F    | 65     | OB    | 191     | 208  | 205    | 167     | 218  | 205    |        |     |       |
| 04-110 | F    | 58     | OB    | 191     | 208  | 205    | 218     | 226  | 209    |        |     |       |
| 04-111 | F    | 56     | OB    | 191     | 208  | 205    | 167     | 218  | 205    |        |     |       |
| 04-113 | F    | 72     | OB    | 167     | 208  | 205    | 218     | 226  | 209    |        |     |       |
| 04-114 | F    | 57     | OB    | 191     | 208  | 205    | 167     | 218  | 205    |        |     |       |
| 04-117 | F    | 69     | OB    | 191     | 208  | 205    | 218     | 226  | 209    |        |     |       |
| 04-118 | F    | 62     | BB    | 167     | 218  | 233    | 218     | 218  | 205    |        |     |       |
| 04-102 | M    | 58     | OB    | 191     | 208  | 205    | 167     | 218  | 209    |        |     |       |
| 04-104 | M    | 61     | OB    | 191     | 208  | 233    | 167     | 218  | 205    |        |     |       |
| 04-105 | M    | 64     | OB    | 191     | 208  | 205    | 167     | 218  | 205    |        |     |       |
| 04-103 | M    | 61     | BB    | 167     | 218  | 233    | 167     | 218  | 205    |        |     |       |
| 04-106 | M    | 70     | BB    | 167     | 218  | 233    | 167     | 218  | 205    |        |     |       |
| 04-108 | M    | 61     | BB    | 167     | 218  | 233    | 218     | 226  | 209    |        |     |       |
| 04-112 | M    | 67     | BB    | 167     | 218  | 233    | 167     | 218  | 205    |        |     |       |
| 04-115 | M    | 62     | BB    | 167     | 218  | 233    | 218     | 226  | 205    |        |     |       |
| 04-116 | M    | 61     | BB    | 167     | 218  | 233    | 218     | 226  | 209    |        |     |       |
| 04-119 | M    | 73     | BB    | 167     | 218  | 233    | 167     | 218  | 205    |        |     |       |
| 04-97  | ?(M) | 69     | OB    | 191     | 208  | 205    | 218     | 226  | 209    |        |     |       |

| UNH2139 | cski | GM264A |
|---------|------|--------|
| 191     | 208  | 205    |
| 167     | 218  | 233    |

| UNH2139 | cski | GM264A |
|---------|------|--------|
| 205     | 209  |        |
| 233     |      |        |

Fisher's Exact using genotypes of all individuals

$X^2$  9.98  
 P 0.019

$X^2$  11.6  
 P 0.009

$X^2$  12.5  
 P 0.006

Fisher's Exact using maternal and paternal alleles

Maternal  $X^2$  7.080  
 P 0.008

Paternal  $X^2$  1.310  
 P 0.253

$X^2$  9.670  
 P 0.002

$X^2$  0.619  
 P 0.431

$X^2$  12.400  
 P <.0001

$X^2$  0.619  
 P 0.431

| LG 7   |      |        |       |         |         |         |         |         |         |        |     |       |
|--------|------|--------|-------|---------|---------|---------|---------|---------|---------|--------|-----|-------|
| Fish   | Sex  | Length | Color | UNH2095 | UNH2086 | UNH2031 | UNH2095 | UNH2086 | UNH2031 | Fish   | Sex | Color |
| 04L-75 | F    |        | OB    | 140     | 152     | 157     | 140     | 176     | 168     | No DNA | M   | BB    |
|        |      |        |       | 129     | 220     | 193     | 140     | 155     | 176     |        |     |       |
| 04-96  | F    | 70     | OB    | 140     | 152     | 157     | 140     | 176     | 168     |        |     |       |
| 04-98  | F    | 65     | OB    | 140     | 152     | 157     | 140     | 176     | 168     |        |     |       |
| 04-99  | F    | 66     | OB    | 129     | 220     | 193     | 140     | 155     | 176     |        |     |       |
| 04-100 | F    | 62     | OB    | 129     | 220     | 193     | 140     | 155     | 176     |        |     |       |
| 04-101 | F    | 65     | OB    | 140     | 152     | 157     | 140     | 176     | 168     |        |     |       |
| 04-107 | F    | 64     | OB    | 140     | 152     | 157     | 140     | 155     | 176     |        |     |       |
| 04-109 | F    | 65     | OB    | 140     | 152     | 157     | 140     | 155     | 176     |        |     |       |
| 04-110 | F    | 58     | OB    | 140     | 152     | 193     | 140     | 155     | 176     |        |     |       |
| 04-111 | F    | 56     | OB    | 140     | 152     | 157     | 140     | 155     | 176     |        |     |       |
| 04-113 | F    | 72     | OB    | 140     | 152     | 157     | 140     | 176     | 168     |        |     |       |
| 04-114 | F    | 57     | OB    | 140     | 152     | 157     | 140     | 155     | 176     |        |     |       |
| 04-117 | F    | 69     | OB    | 129     | 220     | 193     | 140     | 155     | 176     |        |     |       |
| 04-118 | F    | 62     | BB    | 129     | 220     | 193     | 140     | 155     | 176     |        |     |       |
| 04-102 | M    | 58     | OB    | 140     | 152     | 157     | 140     | 176     | 168     |        |     |       |
| 04-104 | M    | 61     | OB    | 140     | 220     | 193     | 140     | 176     | 168     |        |     |       |
| 04-105 | M    | 64     | OB    | 129     | 220     | 193     | 140     | 176     | 168     |        |     |       |
| 04-103 | M    | 61     | BB    | 140     | 152     | 193     | 140     | 176     | 168     |        |     |       |
| 04-106 | M    | 70     | BB    | 129     | 220     | 193     | 140     | 176     | 168     |        |     |       |
| 04-108 | M    | 61     | BB    | 140     | 152     | 157     | 140     | 155     | 176     |        |     |       |
| 04-112 | M    | 67     | BB    | 129     | 220     | 193     | 140     | 155     | 176     |        |     |       |
| 04-115 | M    | 62     | BB    | 129     | 220     | 193     | 140     | 176     | 168     |        |     |       |
| 04-116 | M    | 61     | BB    | 140     | 152     | 157     | 140     | 176     | 168     |        |     |       |
| 04-119 | M    | 73     | BB    | 129     | 220     | 193     | 140     | 176     | 168     |        |     |       |
| 04-97  | ?(M) | 69     | OB    | 140     | 152     | 157     | 140     | 176     | 168     |        |     |       |

| UNH2095 | UNH2086 | UNH2031 |
|---------|---------|---------|
| 140     | 176     | 168     |
| 129     | 220     | 193     |

Fisher's Exact using genotypes of all individuals

$X^2$  2.39  
 P 0.122

$X^2$  9.48  
 P 0.023

$X^2$  10.9  
 P 0.012

Fisher's Exact using maternal and paternal alleles

Maternal  $X^2$  2.390  
 P 0.122

Paternal  $X^2$  NI  
 P Homo

$X^2$  0.419  
 P 0.518

$X^2$  5.490  
 P 0.019

$X^2$  3.490  
 P 0.062

$X^2$  5.490  
 P 0.019

| UNH2095 | UNH2086 | UNH2031 |
|---------|---------|---------|
| 140     | 176     | 155     |
| 129     | 220     | 193     |

Fisher's Exact using genotypes of BB females and all males

$X^2$  0  
 P 1

$X^2$  4.95  
 P 0.175

$X^2$  4.95  
 P 0.175

Fisher's Exact using maternal and paternal alleles

Maternal  $X^2$  0  
 P 1

Paternal  $X^2$  NI  
 P NI

$X^2$  1.320  
 P 0.251

$X^2$  2.930  
 P 0.087

$X^2$  1.930  
 P 0.165

$X^2$  2.930  
 P 0.087

1  
2  
3  
4  
5  
6  
7  
8  
9  
10  
11  
12  
13  
14  
15  
16  
17  
18  
19  
20  
21  
22  
23  
24  
25  
26  
27  
28  
29  
30  
31  
32  
33  
34  
35  
36  
37  
38  
39  
40  
41  
42  
43  
44  
45  
46  
47  
48  
49



S9.3: *Metriaclicma 'kompact'* family Rmb1007 genotypes for LG 5 and LG 7.

**M. 'kompakt'**  
**Rmb1007** Ratio M:F total  
7M : 24F 31 ind

| LG 5      |     |        |       |         |      |        |         |      |        | LG 7              |     |       |        |     |       |        |     |        |       |         |         |         |         |         |         |      |     |       |     |     |
|-----------|-----|--------|-------|---------|------|--------|---------|------|--------|-------------------|-----|-------|--------|-----|-------|--------|-----|--------|-------|---------|---------|---------|---------|---------|---------|------|-----|-------|-----|-----|
| Fish      | Sex | Length | Color | UNH2139 | cski | Gm264a | UNH2139 | cski | Gm264a | Fish              | Sex | Color | 06-144 | Sex | Color | Fish   | Sex | Length | Color | UNH2095 | UNH2086 | UNH2031 | UNH2095 | UNH2086 | UNH2031 | Fish | Sex | Color |     |     |
| 06-163    | F   |        | OB    | 213     | 207  |        | 221     | 225  |        | 06-144            | M   | OB    | 144    | M   | OB    | 06-163 | F   |        | OB    | 144     | 147     | 160     | 147     | 147     | 160     | 147  | 147 | 230   | 156 | 156 |
|           |     |        |       | 196     | 217  |        | 206     | 209  |        | Sex reversed male |     |       | 144    |     |       |        |     |        |       | 144     | 147     | 164     | 144     | 147     | 164     | 144  | 151 | 177   |     |     |
| 200701262 | F   | 63     | OB    | 196     | 217  |        | 206     | 209  |        | 200701262         | F   | 63    | OB     | 144 | 147   | 164    | 147 | 147    | 164   | 144     | 147     | 164     | 144     | 230     | 156     | 156  |     |       |     |     |
| 200701266 | F   | 66     | OB    | 196     | 217  |        | 206     | 209  |        | 200701266         | F   | 66    | OB     | 144 | 147   | 164    | 144 | 147    | 164   | 144     | 147     | 164     | 144     | 230     | 156     | 156  |     |       |     |     |
| 200701270 | F   | 60     | OB    | 213     | 207  |        | 206     | 225  |        | 200701270         | F   | 60    | OB     | 144 | 147   | 160    | 144 | 147    | 160   | 144     | 147     | 160     | 144     | 151     | 177     | 177  |     |       |     |     |
| 200701271 | F   | 59     | OB    | 213     | 207  |        | 221     | 225  |        | 200701271         | F   | 59    | OB     | 144 | 147   | 160    | 144 | 147    | 160   | 144     | 147     | 160     | 144     | 230     | 156     | 156  |     |       |     |     |
| 200701272 | F   | 55     | OB    | 213     | 207  |        | 221     | 225  |        | 200701272         | F   | 55    | OB     | 144 | 147   | 160    | 144 | 147    | 160   | 144     | 147     | 160     | 144     | 151     | 177     | 177  |     |       |     |     |
| 200701273 | F   | 65     | OB    | 213     | 207  |        | 221     | 225  |        | 200701273         | F   | 65    | OB     | 144 | 147   | 160    | 144 | 147    | 160   | 144     | 147     | 160     | 144     | 151     | 177     | 177  |     |       |     |     |
| 200701274 | F   | 58     | OB    | 196     | 207  |        | 221     | 225  |        | 200701274         | F   | 58    | OB     | 144 | 147   | 164    | 144 | 147    | 164   | 144     | 147     | 164     | 144     | 230     | 156     | 156  |     |       |     |     |
| 200701275 | F   | 65     | OB    | 213     | 207  |        | 221     | 225  |        | 200701275         | F   | 65    | OB     | 144 | 147   | 164    | 144 | 147    | 164   | 144     | 147     | 164     | 144     | 230     | 156     | 156  |     |       |     |     |
| 200701277 | F   | 64     | OB    | 213     | 207  |        | 221     | 225  |        | 200701277         | F   | 64    | OB     | 144 | 147   | 164    | 144 | 147    | 164   | 144     | 147     | 164     | 144     | 151     | 177     | 177  |     |       |     |     |
| 200701280 | F   | 65     | OB    | 213     | 207  |        | 221     | 225  |        | 200701280         | F   | 65    | OB     | 144 | 147   | 160    | 144 | 147    | 160   | 144     | 147     | 160     | 144     | 230     | 156     | 156  |     |       |     |     |
| 200701282 | F   | 60     | OB    | 196     | 217  |        | 206     | 209  |        | 200701282         | F   | 60    | OB     | 144 | 147   | 160    | 144 | 147    | 160   | 144     | 147     | 160     | 144     | 230     | 156     | 156  |     |       |     |     |
| 200701285 | F   | 61     | OB    | 213     | 207  |        | 221     | 225  |        | 200701285         | F   | 61    | OB     | 144 | 147   | 164    | 144 | 147    | 164   | 144     | 147     | 164     | 144     | 151     | 177     | 177  |     |       |     |     |
| 200701287 | F   | 68     | OB    | 196     | 217  |        | 206     | 209  |        | 200701287         | F   | 68    | OB     | 144 | 147   | 160    | 144 | 147    | 160   | 144     | 147     | 160     | 144     | 151     | 177     | 177  |     |       |     |     |
| 200701289 | F   | 66     | OB    | 196     | 217  |        | 206     | 209  |        | 200701289         | F   | 66    | OB     | 144 | 147   | 160    | 144 | 147    | 160   | 144     | 147     | 160     | 144     | 151     | 177     | 177  |     |       |     |     |
| 200701291 | F   | 60     | OB    | 213     | 207  |        | 221     | 225  |        | 200701291         | F   | 60    | OB     | 144 | 147   | 160    | 144 | 147    | 160   | 144     | 147     | 160     | 144     | 230     | 156     | 156  |     |       |     |     |
| 200701264 | F   | 63     | O     | 213     | 207  |        | 206     | 209  |        | 200701264         | F   | 63    | O      | 144 | 147   | 160    | 144 | 147    | 160   | 144     | 147     | 160     | 144     | 230     | 156     | 156  |     |       |     |     |
| 200701268 | F   | 61     | O     | 213     | 207  |        | 206     | 209  |        | 200701268         | F   | 61    | O      | 144 | 147   | 164    | 144 | 147    | 164   | 144     | 147     | 164     | 144     | 230     | 156     | 156  |     |       |     |     |
| 200701286 | F   | 60     | O     | 213     | 207  |        | 206     | 209  |        | 200701286         | F   | 60    | O      | 144 | 147   | 164    | 144 | 147    | 164   | 144     | 147     | 164     | 144     | 151     | 177     | 177  |     |       |     |     |
| 200701288 | F   | 65     | O     | 213     | 207  |        | 206     | 209  |        | 200701288         | F   | 65    | O      | 144 | 147   | 160    | 144 | 147    | 160   | 144     | 147     | 160     | 144     | 230     | 156     | 156  |     |       |     |     |
| 200701269 | F   | 61     | BB    | 196     | 217  |        | 221     | 225  |        | 200701269         | F   | 61    | BB     | 144 | 147   | 160    | 144 | 147    | 160   | 144     | 147     | 160     | 144     | 151     | 177     | 177  |     |       |     |     |
| 200701276 | F   | 68     | BB    | 196     | 217  |        | 221     | 225  |        | 200701276         | F   | 68    | BB     | 144 | 147   | 164    | 144 | 147    | 164   | 144     | 147     | 164     | 144     | 230     | 156     | 156  |     |       |     |     |
| 200701278 | F   | 60     | BB    | 196     | 217  |        | 221     | 225  |        | 200701278         | F   | 60    | BB     | 144 | 147   | 160    | 144 | 147    | 160   | 144     | 147     | 160     | 144     | 230     | 156     | 156  |     |       |     |     |
| 200701281 | F   | 61     | BB    | 213     | 217  |        | 221     | 225  |        | 200701281         | F   | 61    | BB     | 144 | 147   | 164    | 144 | 147    | 164   | 144     | 147     | 164     | 144     | 151     | 177     | 177  |     |       |     |     |
| 200701290 | F   | 58     | BB    | 196     | 217  |        | 221     | 225  |        | 200701290         | F   | 58    | BB     | 144 | 147   | 164    | 144 | 147    | 164   | 144     | 147     | 164     | 144     | 230     | 156     | 156  |     |       |     |     |
| 200701265 | M   | 75     | OB    | 213     | 207  |        | 221     | 225  |        | 200701265         | M   | 75    | OB     | 144 | 147   | 160    | 144 | 147    | 160   | 144     | 147     | 160     | 144     | 151     | 177     | 177  |     |       |     |     |
| 200701279 | M   | 66     | OB    | 196     | 217  |        | 206     | 209  |        | 200701265         | M   | 66    | OB     | 144 | 147   | 160    | 144 | 147    | 160   | 144     | 147     | 160     | 144     | 151     | 177     | 177  |     |       |     |     |
| 200701292 | M   | 66     | OB    | 196     | 217  |        | 206     | 209  |        | 200701265         | M   | 66    | OB     | 144 | 147   | 164    | 144 | 147    | 164   | 144     | 147     | 164     | 144     | 230     | 156     | 156  |     |       |     |     |
| 200701263 | M   | 71     | BB    | 196     | 217  |        | 221     | 225  |        | 200701292         | M   | 71    | BB     | 144 | 147   | 160    | 144 | 147    | 160   | 144     | 147     | 160     | 144     | 151     | 177     | 177  |     |       |     |     |
| 200701267 | M   | 79     | BB    | 196     | 217  |        | 221     | 225  |        | 200701283         | M   | 79    | BB     | 144 | 147   | 164    | 144 | 147    | 164   | 144     | 147     | 164     | 144     | 230     | 156     | 156  |     |       |     |     |
| 200701283 | M   | 70     | BB    | 196     | 217  |        | 221     | 225  |        | 200701284         | M   | 70    | BB     | 144 | 147   | 156    | 144 | 147    | 156   | 144     | 147     | 156     | 144     | 151     | 177     | 177  |     |       |     |     |
| 200701284 | M   | 67     | BB    | 196     | 217  |        | 221     | 225  |        | 200701292         | M   | 67    | BB     | 144 | 147   | 160    | 144 | 147    | 160   | 144     | 147     | 160     | 144     | 230     | 156     | 156  |     |       |     |     |

| UNH2139 |            | cski |             |
|---------|------------|------|-------------|
| 221     | 206        | 225  | 209         |
| 213     | M 1<br>F 9 | 207  | M 1<br>F 10 |
| 196     | M 4<br>F 5 | 217  | M 4<br>F 5  |

Fisher's Exact using genotypes of all individuals  
 $X^2$  4.97 P 0.174       $X^2$  4.92 P 0.178

Fisher's Exact using maternal and paternal alleles  
 Maternal  $X^2$  4.210 P 0.040       $X^2$  4.210 P 0.040  
 Paternal  $X^2$  0.392 P 0.531       $X^2$  0.189 P 0.664

| UNH2095     |            | UNH2086 |             | UNH2031     |            |
|-------------|------------|---------|-------------|-------------|------------|
| 144         | 147        | 144     | 230         | 151         | 156        |
| M 4<br>F 16 | M 3<br>F 8 | 147     | M 4<br>F 14 | M 3<br>F 10 | M 1<br>F 4 |
|             |            |         |             |             | M 2<br>F 6 |

Fisher's Exact using genotypes of all individuals  
 $X^2$  0.215 P 0.643       $X^2$  0.00315 P 0.955       $X^2$  0.434 P 0.933

Fisher's Exact using maternal and paternal alleles  
 Maternal  $X^2$  NI P Homo       $X^2$  NI P Homo       $X^2$  0.305 P 0.580  
 Paternal  $X^2$  0.215 P 0.643       $X^2$  0.003 P 0.995       $X^2$  0.003 P 0.995

| UNH2095    |            | UNH2086 |            | UNH2031    |            |
|------------|------------|---------|------------|------------|------------|
| 144        | 147        | 144     | 230        | 151        | 156        |
| M 4<br>F 3 | M 3<br>F 2 | 147     | M 4<br>F 3 | M 3<br>F 2 | M 1<br>F 1 |
|            |            |         |            |            | M 2<br>F 1 |

Fisher's Exact using genotypes of BB females and all males  
 $X^2$  0.0098 P 0.921       $X^2$  0.0098 P 0.921       $X^2$  0.917 P 0.821

Fisher's Exact using maternal and paternal alleles  
 Maternal  $X^2$  NI P Homo       $X^2$  NI P Homo       $X^2$  0.782 P 0.376  
 Paternal  $X^2$  0.010 P 0.921       $X^2$  0.010 P 0.921       $X^2$  0.010 P 0.921

1  
2  
3  
4  
5  
6  
7  
8  
9  
10  
11  
12  
13  
14  
15  
16  
17  
18  
19  
20  
21  
22  
23  
24  
25  
26  
27  
28  
29  
30  
31  
32  
33  
34  
35  
36  
37  
38  
39  
40  
41  
42  
43  
44  
45  
46  
47  
48  
49

S10.1: *Metriacina lombardoi* family A001 genotypes for LG 5 and LG 7.

**M. lombardoi**  
MeloNA-A001  
Ratio M:F  
2M : 15F  
2 Unknown  
total  
19 ind

| LG 5   |        |        |             |         |      |        |         |      |        | LG 7   |        |        |             |     |        |       |         |         |         |         |         |         |        |     |        |
|--------|--------|--------|-------------|---------|------|--------|---------|------|--------|--------|--------|--------|-------------|-----|--------|-------|---------|---------|---------|---------|---------|---------|--------|-----|--------|
| Fish   | Sex    | Length | Color       | UNH2139 | cski | GM264A | UNH2139 | cski | GM264A | Fish   | Sex    | Color  | Fish        | Sex | Length | Color | UNH2095 | UNH2086 | UNH2031 | UNH2095 | UNH2086 | UNH2031 | Fish   | Sex | Color  |
| Wf-01  | F      |        |             | 214     | 221  | 210    | 169     | 221  | 207    | 04L-28 | M      | Yellow | Wf-01       | F   |        |       | 152     | 192     | 173     | 152     | 157     | 133     | 04L-28 | M   | Yellow |
|        |        |        |             | 194     | 213  | 220    | 214     | 216  | 230    |        |        |        |             |     |        |       | 103     | 167     | 153     | 103     | 157     | 175     |        |     |        |
| 400002 | F      | 55     | Blue        | 214     | 221  | 210    | 214     | 216  | 230    | 400002 | F      | 55     | Blue        | 103 | 167    | 153   | 103     | 157     | 133     | 103     | 157     | 133     |        |     |        |
| 400003 | F      | 52     | Blue        | 214     | 221  | 220    | 214     | 216  | 230    | 400003 | F      | 52     | Blue        | 103 | 192    | 173   | 152     | 157     | 133     | 152     | 157     | 133     |        |     |        |
| 400004 | F      | 51     | Yellow/Blue | 214     | 221  | 220    | 169     | 221  | 207    | 400004 | F      | 51     | Yellow/Blue | 152 | 192    | 173   | 152     | 157     | 133     | 152     | 157     | 133     |        |     |        |
| 400008 | F      | 52     | Blue        | 214     | 213  | 210    | 169     | 221  | 207    | 400008 | F      | 52     | Blue        | 152 | 192    | 173   | 103     | 157     | 133     | 103     | 157     | 133     |        |     |        |
| 400009 | F      | 50     | Blue        | 214     | 221  | 220    | 214     | 216  | 207    | 400009 | F      | 50     | Blue        | 152 | 167    | 153   | 152     | 157     | 175     | 152     | 157     | 175     |        |     |        |
| 400010 | F      | 49     | Blue        | 194     | 213  | 210    | 169     | 221  | 207    | 400010 | F      | 49     | Blue        | 152 | 192    | 173   | 103     | 157     | 133     | 103     | 157     | 133     |        |     |        |
| 400011 | F      | 49     | Blue        | 194     | 213  | 210    | 169     | 221  | 207    | 400011 | F      | 49     | Blue        | 103 | 192    | 173   | 152     | 157     | 133     | 152     | 157     | 133     |        |     |        |
| 400012 | F      | 48     | Blue        | 194     | 213  | 210    | 169     | 221  | 207    | 400012 | F      | 48     | Blue        | 152 | 192    | 173   | 103     | 157     | 133     | 103     | 157     | 133     |        |     |        |
| 400013 | F      | 47     | Blue        | 214     | 221  | 210    | 214     | 221  | 230    | 400013 | F      | 47     | Blue        | 152 | 167    | 153   | 152     | 157     | 175     | 152     | 157     | 175     |        |     |        |
| 400051 | imm. F | 60     | Blue        | 194     | 213  | 210    | 169     | 221  | 207    | 400051 | imm. F | 60     | Blue        | 152 | 192    | 173   | 152     | 157     | 133     | 152     | 157     | 133     |        |     |        |
| 400052 | imm. F | 60     | Blue        | 214     | 221  | 220    | 214     | 216  | 230    | 400052 | imm. F | 60     | Blue        | 152 | 192    | 153   | 152     | 157     | 175     | 152     | 157     | 175     |        |     |        |
| 400053 | imm. F | 55     | Blue        | 214     | 221  | 220    | 169     | 216  | 207    | 400053 | imm. F | 55     | Blue        | 152 | 192    | 173   | 152     | 157     | 175     | 152     | 157     | 175     |        |     |        |
| 400054 | imm. F | 57     | Blue        | 194     | 213  | 210    | 214     | 216  | 230    | 400054 | imm. F | 57     | Blue        | 152 | 167    | 153   | 152     | 157     | 175     | 152     | 157     | 175     |        |     |        |
| 400055 | imm. F | 55     | Blue        | 214     | 221  | 210    | 169     | 221  | 230    | 400055 | imm. F | 55     | Blue        | 152 | 167    | 173   | 152     | 157     | 175     | 152     | 157     | 175     |        |     |        |
| 400056 | imm. F | 58     | Blue        | 194     | 213  | 220    | 214     | 216  | 230    | 400056 | imm. F | 58     | Blue        | 152 | 192    | 173   | 152     | 157     | 175     | 152     | 157     | 175     |        |     |        |
| 400001 | M      | 56     | Yellow      | 214     | 221  | 220    | 214     | 216  | 230    | 400001 | M      | 56     | Yellow      | 103 | 167    | 153   | 103     | 157     | 133     | 103     | 157     | 133     |        |     |        |
| 400005 | M      | 53     | Blue        | 214     | 213  | 210    | 214     | 216  | 230    | 400005 | M      | 53     | Blue        | 152 | 192    | 173   | 152     | 157     | 133     | 152     | 157     | 133     |        |     |        |
| 400007 | ?(M)   | 48     | Blue        | 214     | 213  | 210    | 169     | 221  | 207    | 400007 | ?(M)   | 48     | Blue        | 103 | 192    | 173   | 152     | 157     | 133     | 152     | 157     | 133     |        |     |        |
| 400006 | ?      | 47     | Blue        | 214     | 221  | 210    | 169     | 221  | 207    | 400006 | ?      | 47     | Blue        | 152 | 192    | 173   | 152     | 157     | 175     | 152     | 157     | 175     |        |     |        |

**UNH2139**

|     |         |     |      |
|-----|---------|-----|------|
| 169 | 214     | 216 | 221  |
| 214 | M 0 M 2 | M 1 | M 0  |
|     | F 4 F 5 | F 5 | F 3  |
|     | Un 2    |     | Un 1 |
| 194 | M 0 M 0 | M 1 | M 0  |
|     | F 4 F 2 | F 2 | F 5  |
|     |         |     | Un 1 |

**GM264A**

|     |         |
|-----|---------|
| 207 | 230     |
| 210 | M 0 M 1 |
|     | F 5 F 4 |
|     | Un 2    |
| 220 | M 0 M 1 |
|     | F 3 F 3 |

**UNH2095**

|     |         |
|-----|---------|
| 152 | 103     |
| 152 | M 1     |
|     | F 9     |
|     | Un 1    |
| 103 | M 1     |
|     | F 5 F 1 |

**UNH2086**

|     |      |
|-----|------|
| 157 |      |
| 192 | M 1  |
|     | F 10 |
|     | Un 2 |
| 167 | M 1  |
|     | F 5  |

**UNH2031**

|     |           |
|-----|-----------|
| 133 | 175       |
| 173 | M 2 M 0   |
|     | F 6 F 4   |
|     | Un 1 Un 1 |
| 153 | M 1 M 0   |
|     | F 1 F 4   |

Fisher's Exact using genotypes of all individuals

X<sup>2</sup> 3.24  
P 0.356

X<sup>2</sup> 2.55  
P 0.466

X<sup>2</sup> 2.07  
P 0.558

Fisher's Exact using genotypes of all individuals

X<sup>2</sup> 3.51  
P 0.173

X<sup>2</sup> 0.215  
P 0.643

X<sup>2</sup> 3.6  
P 0.309

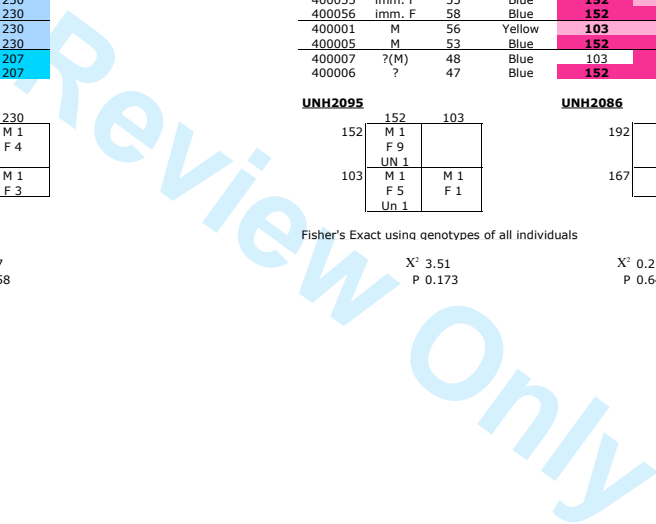

S102: *Metriaclima lombardoi* family A015A genotypes for LG 5 and LG 7.

**M. lombardoi**  
**MeloNA-A015A**

Ratio M:F  
5M : 8F  
total  
13 ind

**LG 5**

| Fish       | Sex | Length | Color       | UNH2139    | cski | Gm264a     | UNH2139    | cski       | Gm264a     |
|------------|-----|--------|-------------|------------|------|------------|------------|------------|------------|
| 200600069  | F   |        |             | 169<br>215 | 223  | 209<br>219 | 215<br>224 | 219<br>223 | 211<br>223 |
| 2007000539 | F   | 50     | Blue        | 169        | 223  | 209        | 224        | 223        | 223        |
| 2007000540 | F   | 50     | Blue        | 215        | 223  | 219        | 224        | 223        | 223        |
| 2007000534 | F   | 64     | Yellow      | 169        | 223  | 219        | 215        | 219        | 211        |
| 2007000544 | F   | 60     | Yellow      | 169        | 223  | 219        | 215        | 219        | 211        |
| 2007000536 | F   | 56     | Yellow/Blue | 169        | 223  | 209        | 224        | 223        | 223        |
| 2007000537 | F   | 53     | Yellow/Blue | 169        | 223  | 219        | 215        | 219        | 211        |
| 2007000538 | F   | 57     | Yellow/Blue | 215        | 223  | 209        | 215        | 219        | 211        |
| 2007000541 | F   | 57     | Yellow/Blue | 215        | 223  | 219        | 215        | 219        | 211        |
| 2007000532 | M   | 60     | Yellow      | 215        | 223  | 209        | 215        | 223        | 223        |
| 2007000533 | M   | 55     | Yellow      | 169        | 223  | 209        | 215        | 219        | 211        |
| 2007000535 | M   | 52     | Yellow      | 169        | 223  | 209        | 215        | 223        | 211        |
| 2007000543 | M   | 60     | Yellow      | 215        | 223  | 209        | 215        | 219        | 211        |
| 2007000542 | M   | 54     | Yellow/Blue | 215        | 223  | 209        | 215        | 219        | 211        |

| UNH2139 |            |            | cski |            |            | Gm264a |            |            |
|---------|------------|------------|------|------------|------------|--------|------------|------------|
| 169     | M 2<br>F 3 | M 0<br>F 2 | 223  | M 3<br>F 5 | M 2<br>F 3 | 209    | M 4<br>F 1 | M 1<br>F 2 |
| 215     | M 3<br>F 2 | M 0<br>F 1 |      |            |            | 219    | M 0<br>F 3 | M 0<br>F 2 |

Fisher's Exact using genotypes of all individuals

X<sup>2</sup> 2.86  
P 0.414

X<sup>2</sup> 0.00812  
P 0.928

X<sup>2</sup> 6.8  
P 0.078

Fisher's Exact using maternal and paternal alleles

Maternal X<sup>2</sup> 0.627  
P 0.429

X<sup>2</sup> NI  
P Homo

X<sup>2</sup> 5.080  
P 0.024

Paternal X<sup>2</sup> 2.440  
P 0.118

X<sup>2</sup> 0.008  
P 0.928

X<sup>2</sup> 1.170  
P 0.279

**LG 7**

| Fish       | Sex | Length | Color       | UNH2095    | UNH2086    | UNH2031 | UNH2095    | UNH2086    | UNH2031    | Fish     | Sex | Color  |
|------------|-----|--------|-------------|------------|------------|---------|------------|------------|------------|----------|-----|--------|
| 200600069  | F   |        |             | 157<br>132 | 127<br>154 | 164     | 103<br>132 | 154<br>156 | 166<br>133 | 20055047 | M   | Yellow |
| 2007000534 | F   | 64     | Yellow      | 157        | 154        | 164     | 132        | 156        | 133        |          |     |        |
| 2007000536 | F   | 56     | Yellow/Blue | 157        | 154        | 164     | 103        | 156        | 133        |          |     |        |
| 2007000537 | F   | 53     | Yellow/Blue | 157        | 127        | 164     | 132        | 154        | 166        |          |     |        |
| 2007000538 | F   | 57     | Yellow/Blue | 132        | 127        | 164     | 132        | 156        | 133        |          |     |        |
| 2007000539 | F   | 50     | Blue        | 157        | 154        | 164     | 132        | 156        | 166        |          |     |        |
| 2007000540 | F   | 50     | Blue        | 157        | 154        | 164     | 103        | 154        | 166        |          |     |        |
| 2007000541 | F   | 57     | Yellow/Blue | 157        | 154        | 164     | 103        | 154        | 166        |          |     |        |
| 2007000544 | F   | 60     | Yellow      | 132        | 127        | 164     | 103        | 154        | 166        |          |     |        |
| 2007000532 | M   | 60     | Yellow      | 132        | 127        | 164     | 103        | 154        | 166        |          |     |        |
| 2007000533 | M   | 55     | Yellow      | 132        | 127        | 164     | 103        | 154        | 166        |          |     |        |
| 2007000535 | M   | 52     | Yellow      | 157        | 154        | 164     | 103        | 154        | 166        |          |     |        |
| 2007000542 | M   | 54     | Yellow      | 157        | 154        | 164     | 132        | 154        | 166        |          |     |        |
| 2007000543 | M   | 60     | Yellow/Blue | 132        | 127        | 164     | 103        | 154        | 166        |          |     |        |

| UNH2095 |            |            | UNH2086 |            |            | UNH2031 |            |            |
|---------|------------|------------|---------|------------|------------|---------|------------|------------|
| 157     | M 1<br>F 2 | M 1<br>F 4 | 127     | M 3<br>F 2 | M 0<br>F 1 | 164     | M 5<br>F 4 | M 0<br>F 4 |
| 132     | M 3<br>F 1 | M 0<br>F 1 | 154     | M 2<br>F 2 | M 0<br>F 3 |         |            |            |

Fisher's Exact using genotypes of all individuals

X<sup>2</sup> 3.63  
P 0.304

X<sup>2</sup> 3.7  
P 0.295

X<sup>2</sup> 3.61  
P 0.0571

Fisher's Exact using maternal and paternal alleles

Maternal X<sup>2</sup> 1.590  
P 0.207

X<sup>2</sup> 0.627  
P 0.429

X<sup>2</sup> NI  
P Homo

Paternal X<sup>2</sup> 2.24  
P 0.135

X<sup>2</sup> 3.610  
P 0.057

X<sup>2</sup> 3.610  
P 0.057

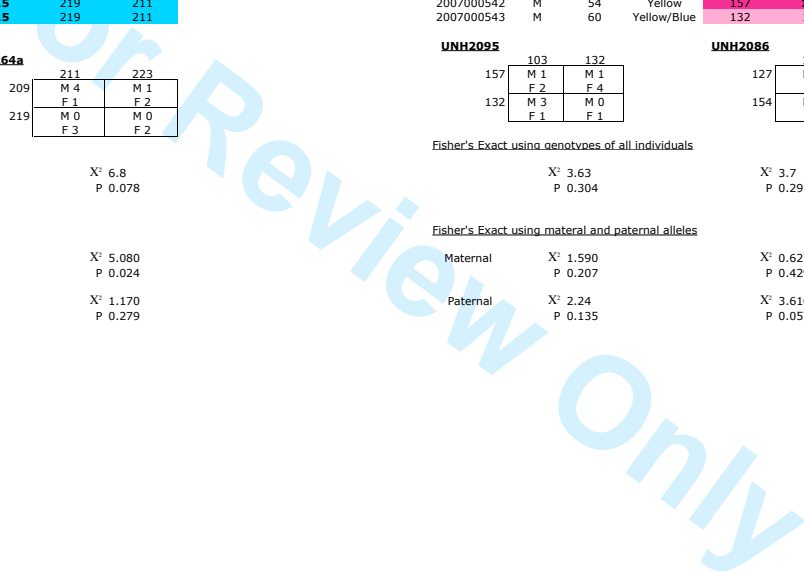

1  
2  
3  
4  
5  
6  
7  
8  
9  
10  
11  
12  
13  
14  
15  
16  
17  
18  
19  
20  
21  
22  
23  
24  
25  
26  
27  
28  
29  
30  
31  
32  
33  
34  
35  
36  
37  
38  
39  
40  
41  
42  
43  
44  
45  
46  
47  
48  
49

1  
2  
3  
4  
5  
6  
7  
8  
9  
10  
11  
12  
13  
14  
15  
16  
17  
18  
19  
20  
21  
22  
23  
24  
25  
26  
27  
28  
29  
30  
31  
32  
33  
34  
35  
36  
37  
38  
39  
40  
41  
42  
43  
44  
45  
46  
47  
48  
49

S10.3: *Metricloma lombardoi* family A019 genotypes for LG 5 and LG 7.

**M. lombardoi** Ratio M:F total  
**MeloNA-A019** 10M : 13F 23 ind

**LG 5**

| Fish      | Sex | Length | Color         | UNH2139    | cski       | Gm264a     |
|-----------|-----|--------|---------------|------------|------------|------------|
| 200600190 | F   |        |               | 196<br>210 | 225<br>225 | 218<br>222 |
| 200700733 | F   | 60     | Yellow/Bluish | 196        | 225        | 218        |
| 200700734 | F   | 61     | Blue/Yellow   | 210        | 225        |            |
| 200700735 | F   | 63     | Blue/Yellow   | 196        | 225        |            |
| 200700736 | F   | 60     | Blue          | 196        | 225        | 222        |
| 200700737 | F   | 55     | Blue          | 196        | 225        | 218        |
| 200700738 | F   | 57     | Blue          | 196        | 225        | 222        |
| 200700739 | F   | 58     | Blue          | 210        | 225        | 222        |
| 200700740 | F   | 62     | Blue          | 210        | 225        |            |
| 200700741 | F   | 64     | Blue          | 210        | 225        | 218        |
| 200700742 | F   | 60     | Blue          | 196        | 225        |            |
| 200700743 | F   | 60     | Blue          | 196        | 225        | 222        |
| 200700744 | F   | 57     | Blue          | 196        | 225        | 222        |
| 200700745 | F   | 56     | Blue          | 210        | 225        | 218        |
| 200700723 | M   | 65     | Yellow        | 196        | 225        | 218        |
| 200700724 | M   | 63     | Yellow        | 196        | 225        | 218        |
| 200700725 | M   | 62     | Yellow        | 196        | 225        | 218        |
| 200700726 | M   | 67     | Yellow        | 210        | 222        | 218        |
| 200700727 | M   | 66     | Yellow        | 210        | 225        |            |
| 200700728 | M   | 66     | Yellow        | 196        | 225        |            |
| 200700729 | M   | 65     | Yellow        | 210        | 225        | 222        |
| 200700730 | M   | 67     | Yellow        | 196        | 225        | 222        |
| 200700731 | M   | 62     | Yellow/Brown  | 196        | 225        | 222        |
| 200700732 | M   | 66     | Yellow/Brown  | 196        | 225        |            |

**UNH2139**

|     |     |     |
|-----|-----|-----|
| 196 | M 2 | M 5 |
|     | F 3 | F 5 |
| 210 | M 1 | M 2 |
|     | F 4 | F 1 |

**cski**

|     |     |     |
|-----|-----|-----|
| 225 | M 5 | M 4 |
|     | F 7 | F 6 |

**LG 5**

| Fish      | Sex | Color        | UNH2139 | cski | Gm264a |
|-----------|-----|--------------|---------|------|--------|
| 2005-5047 | M   | Yellow       | 218     | 221  | 213    |
| 200700723 | M   | Yellow       | 218     | 221  | 213    |
| 200700724 | M   | Yellow       | 227     | 225  | 225    |
| 200700725 | M   | Yellow       | 227     | 225  | 225    |
| 200700726 | M   | Yellow       | 227     | 221  | 213    |
| 200700727 | M   | Yellow       | 227     | 221  | 213    |
| 200700728 | M   | Yellow       | 227     | 221  | 213    |
| 200700729 | M   | Yellow       | 218     | 221  | 225    |
| 200700730 | M   | Yellow       | 218     | 221  | 225    |
| 200700731 | M   | Yellow/Brown | 227     | 225  | 225    |
| 200700732 | M   | Yellow/Brown | 227     | 225  | 225    |

**Gm264a**

|     |     |     |
|-----|-----|-----|
| 218 | M 2 | M 2 |
|     | F 1 | F 3 |
| 222 | M 1 | M 3 |
|     | F 2 | F 3 |

Fisher's Exact using genotypes of all individuals

|                       |                          |                        |
|-----------------------|--------------------------|------------------------|
| $X^2$ 1.98<br>P 0.577 | $X^2$ 0.00627<br>P 0.937 | $X^2$ 0.811<br>P 0.847 |
|-----------------------|--------------------------|------------------------|

Fisher's Exact using maternal and paternal alleles

|                                    |                        |                        |
|------------------------------------|------------------------|------------------------|
| Maternal<br>$X^2$ 0.646<br>P 0.421 | $X^2$ NI<br>P Homo     | $X^2$ 0.053<br>P 0.819 |
| Paternal<br>$X^2$ 1.310<br>P 0.253 | $X^2$ 0.006<br>P 0.937 | $X^2$ 0.032<br>P 0.858 |

**LG 7**

| Fish      | Sex | Length | Color         | UNH2095    | UNH2086    | UNH2031    | Fish      | Sex | Color  |               |
|-----------|-----|--------|---------------|------------|------------|------------|-----------|-----|--------|---------------|
| 200600190 | F   |        |               | 102<br>132 | 128<br>156 | 151<br>133 | 20055047  | M   | Yellow |               |
| 200700733 | F   | 60     | Yellow/Bluish | 132        | 156        | 133        | 200700733 | F   | 60     | Yellow/Bluish |
| 200700734 | F   | 61     | Blue/Yellow   | 132        | 128        | 151        | 200700734 | F   | 61     | Blue/Yellow   |
| 200700735 | F   | 63     | Blue/Yellow   | 102        | 156        | 133        | 200700735 | F   | 63     | Blue/Yellow   |
| 200700736 | F   | 60     | Blue          | 102        | 128        | 151        | 200700736 | F   | 60     | Blue          |
| 200700737 | F   | 55     | Blue          | 132        | 128        | 151        | 200700737 | F   | 55     | Blue          |
| 200700738 | F   | 57     | Blue          | 132        | 156        | 133        | 200700738 | F   | 57     | Blue          |
| 200700739 | F   | 58     | Blue          | 102        | 128        | 151        | 200700739 | F   | 58     | Blue          |
| 200700740 | F   | 62     | Blue          | 132        | 156        | 133        | 200700740 | F   | 62     | Blue          |
| 200700741 | F   | 64     | Blue          | 132        | 128        | 151        | 200700741 | F   | 64     | Blue          |
| 200700742 | F   | 60     | Blue          | 132        | 128        | 151        | 200700742 | F   | 60     | Blue          |
| 200700743 | F   | 60     | Blue          | 132        | 156        | 133        | 200700743 | F   | 60     | Blue          |
| 200700744 | F   | 57     | Blue          | 102        | 128        | 151        | 200700744 | F   | 57     | Blue          |
| 200700745 | F   | 56     | Blue          | 132        | 156        | 151        | 200700745 | F   | 56     | Blue          |
| 200700723 | M   | 65     | Yellow        | 102        | 128        | 151        | 200700723 | M   | 65     | Yellow        |
| 200700724 | M   | 63     | Yellow        | 132        | 128        | 151        | 200700724 | M   | 63     | Yellow        |
| 200700725 | M   | 62     | Yellow        | 102        | 128        | 151        | 200700725 | M   | 62     | Yellow        |
| 200700726 | M   | 67     | Yellow        | 132        | 128        | 1747       | 200700726 | M   | 67     | Yellow        |
| 200700727 | M   | 66     | Yellow        | 132        | 156        | 133        | 200700727 | M   | 66     | Yellow        |
| 200700728 | M   | 66     | Yellow        | 132        | 156        | 133        | 200700728 | M   | 66     | Yellow        |
| 200700729 | M   | 65     | Yellow        | 132        | 128        | 151        | 200700729 | M   | 65     | Yellow        |
| 200700730 | M   | 67     | Yellow        | 132        | 156        | 133        | 200700730 | M   | 67     | Yellow        |
| 200700731 | M   | 62     | Yellow/Brown  | 102        | 128        | 151        | 200700731 | M   | 62     | Yellow/Brown  |
| 200700732 | M   | 66     | Yellow/Brown  | 132        | 156        | 133        | 200700732 | M   | 66     | Yellow/Brown  |

**UNH2095**

|     |     |     |
|-----|-----|-----|
| 102 | M 2 | M 1 |
|     | F 0 | F 7 |
| 132 | M 7 | M 1 |
|     | F 6 | F 7 |

**UNH2086**

|     |     |     |
|-----|-----|-----|
| 154 | M 6 | M 0 |
|     | F 0 | F 7 |
| 156 | M 3 | M 1 |
|     | F 0 | F 6 |

**UNH2031**

|     |     |     |
|-----|-----|-----|
| 166 | M 5 | M 0 |
|     | F 0 | F 7 |
| 133 | M 3 | M 1 |
|     | F 0 | F 5 |

Fisher's Exact using genotypes of all individuals

|                       |                        |                       |
|-----------------------|------------------------|-----------------------|
| $X^2$ 6.29<br>P 0.043 | $X^2$ 19.5<br>P <.0001 | $X^2$ 17.6<br>P 0.001 |
|-----------------------|------------------------|-----------------------|

Fisher's Exact using maternal and paternal alleles

|                               |                          |                          |
|-------------------------------|--------------------------|--------------------------|
| Maternal<br>$X^2$ NI<br>P Het | $X^2$ 0.087<br>P 0.768   | $X^2$ 0.016<br>P 0.899   |
| Paternal<br>$X^2$ NI<br>P Het | $X^2$ 19.000<br>P <.0001 | $X^2$ 18.300<br>P <.0001 |

S10.4: *Metriaclima lombardoi* family A026 genotypes for LG 5 and LG 7.

| <b>M. lombardoi</b> |     |        |             |         |      |        |         |      |        | Ratio M:F   |     |        | total       |         |         |         |         |         |         |          |     |        |
|---------------------|-----|--------|-------------|---------|------|--------|---------|------|--------|-------------|-----|--------|-------------|---------|---------|---------|---------|---------|---------|----------|-----|--------|
| <b>Melo-A026</b>    |     |        |             |         |      |        |         |      |        | 18M : 12F   |     |        | 30 ind      |         |         |         |         |         |         |          |     |        |
| <b>LG 5</b>         |     |        |             |         |      |        |         |      |        | <b>LG 7</b> |     |        |             |         |         |         |         |         |         |          |     |        |
| Fish                | Sex | Length | Color       | UNH2139 | cski | GM264A | UNH2139 | cski | GM264A | Fish        | Sex | Length | Color       | UNH2095 | UNH2086 | UNH2031 | UNH2095 | UNH2086 | UNH2031 | Fish     | Sex | Color  |
| 200600042           | F   |        |             | 227     | 221  | 221    | 218     | 221  | 213    | 2005-5047   | M   |        | Yellow      | 102     | 172     | 154     | 102     | 157     | 166     | 20055047 | M   | Yellow |
|                     |     |        |             | 213     | 221  | 229    | 227     | 225  | 225    |             |     |        |             | 132     | 220     | 162     | 132     | 161     | 135     |          |     |        |
| 200600545           | F   | 63     | Blue        | 227     | 221  | 221    | 227     | 221  | 225    | 200600545   | F   | 63     | Blue        | 102     | 172     | 154     | 102     | 161     | 135     |          |     |        |
| 200600546           | F   | 56     | Blue        | 213     | 221  | 221    | 218     | 221  | 213    | 200600546   | F   | 56     | blue        | 132     | 220     | 162     | 102     | 161     | 135     |          |     |        |
| 200600553           | F   | 57     | Blue        | 213     | 221  | 221    | 227     | 225  | 225    | 200600553   | F   | 57     | Blue        | 132     | 172     | 154     | 132     | 161     | 135     |          |     |        |
| 200600554           | F   | 64     | Blue        | 213     | 221  | 229    | 218     | 221  | 213    | 200600554   | F   | 64     | Blue        | 132     | 172     | 154     | 132     | 161     | 135     |          |     |        |
| 200600562           | F   | 52     | Blue        | 227     | 221  | 221    | 227     | 225  | 225    | 200600562   | F   | 52     | Blue        | 132     | 172     | 154     | 132     | 161     | 135     |          |     |        |
| 200600563           | F   | 52     | Blue        | 213     | 221  | 221    | 218     | 221  | 213    | 200600563   | F   | 52     | Blue        | 102     | 172     | 154     | 132     | 161     | 135     |          |     |        |
| 200600564           | F   | 58     | Blue        | 213     | 221  | 229    | 218     | 225  | 213    | 200600564   | F   | 58     | Blue        | 132     | 220     | 162     | 132     | 161     | 135     |          |     |        |
| 200600565           | F   | 59     | Blue        | 227     | 221  | 229    | 227     | 225  | 225    | 200600565   | F   | 59     | Blue        | 132     | 172     | 154     | 132     | 161     | 135     |          |     |        |
| 200600566           | F   | 55     | Blue        | 213     | 221  | 221    | 218     | 221  | 213    | 200600566   | F   | 55     | Blue        | 132     | 172     | 154     | 132     | 161     | 135     |          |     |        |
| 200600567           | F   | 55     | Blue        | 213     | 221  | 229    | 227     | 221  | 225    | 200600567   | F   | 55     | Blue        | 132     | 220     | 154     | 132     | 161     | 166     |          |     |        |
| 200600568           | F   | 56     | Blue        | 213     | 221  | 221    | 218     | 221  | 213    | 200600568   | F   | 56     | Blue        | 132     | 220     | 162     | 132     | 161     | 135     |          |     |        |
| 200600569           | F   | 58     | Blue        | 227     | 221  | 221    | 218     | 221  | 213    | 200600569   | F   | 58     | Blue        | 132     | 172     | 154     | 132     | 161     | 135     |          |     |        |
| 200600552           | M   | 61     | Blue        | 227     | 221  | 221    | 227     | 225  | 225    | 200600540   | M   | 70     | Yellow      | 132     | 172     | 154     | 102     | 157     | 166     |          |     |        |
| 200600555           | M   | 61     | Blue        | 227     | 221  | 221    | 218     | 221  | 225    | 200600541   | M   | 63     | Yellow      | 102     | 220     | 162     | 102     | 157     | 166     |          |     |        |
| 200600561           | M   | 54     | Blue        | 227     | 221  | 221    | 227     | 225  | 225    | 200600542   | M   | 68     | Yellow      | 102     | 220     | 162     | 102     | 157     | 166     |          |     |        |
| 200600560           | M   | 65     | Blue/Yellow | 227     | 221  | 229    | 227     | 221  | 213    | 200600543   | M   | 63     | Yellow      | 102     | 220     |         | 102     | 157     |         |          |     |        |
| 200600540           | M   | 70     | Yellow      | 227     | 221  | 221    | 227     | 225  | 225    | 200600544   | M   | 69     | Yellow      | 132     | 172     | 154     | 102     | 157     | 166     |          |     |        |
| 200600541           | M   | 63     | Yellow      | 227     | 221  | 229    | 227     | 221  | 225    | 200600547   | M   | 64     | Yellow/blue | 102     | 172     | 162     | 102     | 157     | 166     |          |     |        |
| 200600542           | M   | 68     | Yellow      | 227     | 221  | 221    | 227     | 225  | 225    | 200600548   | M   | 66     | Yellow      | 102     | 172     | 154     | 102     | 157     | 166     |          |     |        |
| 200600543           | M   | 63     | Yellow      | 227     | 221  | 229    | 227     | 221  | 225    | 200600549   | M   | 63     | Yellow      | 102     | 172     | 154     | 102     | 157     | 166     |          |     |        |
| 200600544           | M   | 69     | Yellow      | 213     | 221  | 221    | 218     | 221  | 213    | 200600550   | M   | 64     | Yellow/blue | 102     | 220     | 162     | 102     | 157     | 166     |          |     |        |
| 200600548           | M   | 66     | Yellow      | 227     | 221  | 221    | 218     | 221  | 213    | 200600551   | M   | 65     | Yellow      | 102     | 172     | 162     | 102     | 157     | 166     |          |     |        |
| 200600549           | M   | 63     | Yellow      | 227     | 221  | 221    | 218     | 221  | 213    | 200600552   | M   | 61     | Blue        | 132     | 220     | 162     | 102     | 157     | 166     |          |     |        |
| 200600551           | M   | 65     | Yellow      | 227     | 221  | 221    | 227     | 225  | 213    | 200600555   | M   | 61     | Blue        | 102     | 172     |         | 102     | 157     |         |          |     |        |
| 200600556           | M   | 67     | Yellow      | 227     | 221  | 221    | 218     | 221  | 213    | 200600556   | M   | 67     | Yellow      | 102     | 172     | 154     | 102     | 157     | 166     |          |     |        |
| 200600557           | M   | 69     | Yellow      | 227     | 221  | 221    | 227     | 221  | 225    | 200600557   | M   | 69     | Yellow      | 132     | 172     | 154     | 102     | 157     | 166     |          |     |        |
| 200600558           | M   | 67     | Yellow      | 227     | 221  | 221    | 227     | 225  | 225    | 200600558   | M   | 67     | Yellow      | 132     | 172     | 154     | 102     | 157     | 166     |          |     |        |
| 200600559           | M   | 58     | Yellow      | 227     | 221  | 221    | 218     | 221  | 225    | 200600559   | M   | 58     | Yellow      | 102     | 172     | 154     | 102     | 157     | 166     |          |     |        |
| 200600547           | M   | 64     | Yellow/blue | 227     | 221  | 221    | 218     |      | 213    | 200600560   | M   | 65     | Blue/Yellow | 102     |         | 162     | 102     |         | 166     |          |     |        |
| 200600550           | M   | 64     | Yellow/blue | 227     | 221  | 221    | 218     | 221  | 213    | 200600561   | M   | 54     | Blue        | 102     | 220     | 162     | 102     | 157     | 166     |          |     |        |

  

| <b>UNH 2139</b> |     |      |     | <b>cski</b> |     |     |     | <b>GM264A</b> |     |     |     | <b>UNH2095</b> |     |     |     | <b>UNH2086</b> |     |     |     | <b>UNH2031</b> |     |     |     |     |     |     |     |  |
|-----------------|-----|------|-----|-------------|-----|-----|-----|---------------|-----|-----|-----|----------------|-----|-----|-----|----------------|-----|-----|-----|----------------|-----|-----|-----|-----|-----|-----|-----|--|
| 227             | 218 | 227  |     | 221         | 225 |     |     | 227           | 213 | 225 |     |                |     |     |     |                |     |     |     |                |     |     |     |     |     |     |     |  |
| M 7             | F 1 | M 10 | F 3 | M 11        | M 6 | F 8 | F 4 | M 6           | F 5 | M 8 | F 2 | M 13           | F 0 | M 5 | F 3 | M 10           | F 0 | M 0 | F 8 | M 8            | M 0 | F 1 | M 8 | M 0 | F 8 | M 0 | F 3 |  |
| 213             | M 1 | M 0  | F 2 |             |     |     |     | M 2           | F 2 | M 2 | F 3 | 132            | M 0 | F 9 |     | M 6            | M 0 | F 0 | F 4 | 162            | M 8 | M 0 | F 0 |     |     |     |     |  |

  

| Fisher's Exact using genotypes of all individuals |                      |                      |                      | Fisher's Exact using maternal and paternal alleles |                      |                     |                   |                   |                      |                     |                      |          |
|---------------------------------------------------|----------------------|----------------------|----------------------|----------------------------------------------------|----------------------|---------------------|-------------------|-------------------|----------------------|---------------------|----------------------|----------|
| X <sup>2</sup> 14.6                               | P 0.002              | X <sup>2</sup> 0.012 | P 0.913              | X <sup>2</sup> 2.8                                 | P 0.423              | X <sup>2</sup> 22.2 | P <.0001          | X <sup>2</sup> 28 | P <.0001             | X <sup>2</sup> 24.4 | P <.0001             |          |
| Maternal                                          | X <sup>2</sup> 5.69  | P 0.017              | X <sup>2</sup> NI    | P Homo                                             | X <sup>2</sup> 1.300 | P 0.255             | X <sup>2</sup> NI | P Het             | X <sup>2</sup> 0.052 | P 0.820             | X <sup>2</sup> 1.800 | P 0.180  |
| Paternal                                          | X <sup>2</sup> 0.556 | P 0.456              | X <sup>2</sup> 0.012 | P 0.913                                            | X <sup>2</sup> 0.556 | P 0.456             | X <sup>2</sup> NI | P Het             | X <sup>2</sup> 29.00 | P <.0001            | X <sup>2</sup> 24.20 | P <.0001 |



1  
2  
3  
4  
5  
6  
7  
8  
9  
10  
11  
12  
13  
14  
15  
16  
17  
18  
19  
20  
21  
22  
23  
24  
25  
26  
27  
28  
29  
30  
31  
32  
33  
34  
35  
36  
37  
38  
39  
40  
41  
42  
43  
44  
45  
46  
47  
48  
49

S11.1: *Metriclaima mbenjii* family A004 genotypes for LG 5 and LG 7.

**M. mbenjii**  
Memb-A004  
Ratio M:F  
4M : 27F  
3 Unknown  
total  
34 ind

LG 5

| Fish      | Sex  | Length | Color | UNH2139 | cski    | Gm264a | UNH2139 | cski    | Gm264a | Fish      | Sex |
|-----------|------|--------|-------|---------|---------|--------|---------|---------|--------|-----------|-----|
| 200600134 | F    |        | BB    | 194     | 219     | 200    | 194     | 213     | 209    | 200600135 | M   |
|           |      |        |       | 221     | 211     | 209    | 213     | 227     | 229    |           |     |
| 200600970 | F    | 58     | BB    | 194     | 219     | 209    | 194     | 213     | 209    |           |     |
| 200600971 | F    | 60     | BB    | 221     | 211     | 200    | 194     | 213     | 209    |           |     |
| 200600973 | F    | 60     | BB    | 194     | 219     | 209    | 213     | 227     | 209    |           |     |
| 200600974 | F    | 65     | BB    | 194     | 219     |        | 213     | 227     |        |           |     |
| 200600975 | F    | 67     | BB    | 194     | 211     | 209    | 194     | 213     | 209    |           |     |
| 200600976 | F    | 62     | BB    | 221     | 211     |        | 194     | 213     |        |           |     |
| 200600977 | F    | 60     | BB    | 221     | 211     | 200    | 194     | 213     | 209    |           |     |
| 200600979 | F    | 59     | BB    | 221     | 211     | 200    | 213     | 213     | 209    |           |     |
| 200600980 | F    | 66     | BB    | 194     | 219     |        | 194     | 227     |        |           |     |
| 200600982 | F    | 61     | BB    | 194     | 215/221 | 200    | 194     | 215/221 | 209    |           |     |
| 200600983 | F    | 69     | BB    |         | 219     | 209    |         | 227     | 209    |           |     |
| 200600985 | F    | 64     | BB    | 194     | 219     |        | 194     | 213     |        |           |     |
| 200600986 | F    | 67     | BB    | 221     | 211     |        | 213     | 213     |        |           |     |
| 200600987 | F    | 61     | BB    | 221     | 219     |        | 194     | 218     |        |           |     |
| 200600989 | F    | 62     | BB    | 194     | 219     | 200    | 194     | 213     | 209    |           |     |
| 200600990 | F    | 56     | BB    | 194     | 219     | 209    | 213     | 227     | 209    |           |     |
| 200600991 | F    | 56     | BB    | 221     | 211     | 209    | 213     | 213     | 209    |           |     |
| 200600992 | F    | 57     | BB    | 221     | 211     | 209    | 194     | 213     | 209    |           |     |
| 200600993 | F    | 67     | BB    | 194     | 219     |        | 194     | 213     |        |           |     |
| 200600994 | F    | 62     | BB    |         | 219     | 209    | 194     | 213     | 209    |           |     |
| 200600995 | F    | 54     | BB    | 221     | 211     | 209    | 194     | 213     | 209    |           |     |
| 200600997 | F    | 62     | BB    | 194     | 219     | 209    | 194     | 227     | 209    |           |     |
| 200600998 | F    | 65     | BB    | 194     | 219     | 209    | 213     | 227     | 229    |           |     |
| 200600999 | F    | 58     | BB    | 194     | 219     | 209    | 194     | 213     | 209    |           |     |
| 200601102 | F    | 60     | BB    | 194     | 219     | 209    | 213     | 227     | 229    |           |     |
| 200601103 | F    | 65     | BB    | 221     | 211     |        | 213     | 227     |        |           |     |
| 200601104 | F    | 40     | BB    |         | 219     | 231    |         | 221     | 231    |           |     |
| 200600972 | M    | 65     | BB    | 221     | 211     |        | 213     | 227     |        |           |     |
| 200600978 | M    | 61     | BB    | 194     | 219     | 200    | 213     | 227     | 209    |           |     |
| 200600981 | M    | 62     | BB    | 194     | 215     | 209    | 194     | 227     | 209    |           |     |
| 200600984 | M    | 63     | BB    | 194     | 219     | 209    | 213     | 227     | 229    |           |     |
| 200601101 | ?(M) | 59     | BB    | 194     | 219     | 209    | 194     | 213     | 209    |           |     |
| 200600996 | ?    | 60     | BB    | 194     | 211     |        | 194     | 213     |        |           |     |
| 200601000 | ?    | 62     | BB    | 221     | 211     | 200    | 213     | 227     | 209    |           |     |

LG 7

| Fish      | Sex  | Length | Color | UNH2095 | UNH2086 | UNH2031 | UNH2095 | UNH2086 | UNH2031 | Fish      | Sex |
|-----------|------|--------|-------|---------|---------|---------|---------|---------|---------|-----------|-----|
| 200600134 | F    |        | BB    | 123     | 222     | 131     | 150     | 134     | 187     | 200600135 | M   |
|           |      |        |       | 176     | 174     | 140     | 103     | 134     | 147     |           |     |
| 200600970 | F    | 58     | BB    | 123     | 222     | 131     | 103     | 134     | 147     |           |     |
| 200600971 | F    | 60     | BB    | 123     | 222     | 131     | 150     | 134     | 187     |           |     |
| 200600973 | F    | 60     | BB    | 176     | 174     | 140     | 150     | 134     | 187     |           |     |
| 200600974 | F    | 65     | BB    | 176     | 174     | 140     | 150     | 134     | 187     |           |     |
| 200600975 | F    | 67     | BB    |         | 222     |         |         | 134     |         |           |     |
| 200600976 | F    | 62     | BB    |         | 174     | 140     |         | 134     | 187     |           |     |
| 200600977 | F    | 60     | BB    | 123     | 222     | 131     | 103     | 134     | 147     |           |     |
| 200600979 | F    | 59     | BB    | 176     | 174     | 140     | 150     | 134     | 187     |           |     |
| 200600980 | F    | 66     | BB    | 123     | 222     | 140     | 103     | 134     | 187     |           |     |
| 200600982 | F    | 61     | BB    | 123     | 174     | 140     | 103     | 134     | 147     |           |     |
| 200600983 | F    | 69     | BB    | 123     | 222     |         | ?       | 134     |         |           |     |
| 200600985 | F    | 64     | BB    | 222     |         |         |         | 134     |         |           |     |
| 200600986 | F    | 67     | BB    | 176     | 174     |         | 150     | 134     |         |           |     |
| 200600987 | F    | 61     | BB    | 123     | 222     | 131     | 150     | 134     | 187     |           |     |
| 200600989 | F    | 62     | BB    | 176     | 174     | 140     | 150     | 134     | 187     |           |     |
| 200600990 | F    | 56     | BB    | 123     | 222     | 131     | 103     | 134     | 147     |           |     |
| 200600991 | F    | 56     | BB    | 123     | 222     | 131     | 150     | 134     | 147     |           |     |
| 200600992 | F    | 57     | BB    | 176     | 162     | 140     | 150     | 162?    | 187     |           |     |
| 200600993 | F    | 67     | BB    | 176     | 174     | 140     | 150     | 134     | 187     |           |     |
| 200600994 | F    | 62     | BB    | 123     | 206     | 131     | 103     | 134     | 147     |           |     |
| 200600995 | F    | 54     | BB    | 176     | 174     | 140     | 150     | 134     | 147     |           |     |
| 200600997 | F    | 62     | BB    | 123     | 222     | 131     | 150     | 134     | 187     |           |     |
| 200600998 | F    | 65     | BB    | 176     | 174     | 140     | 150     | 134     | 187     |           |     |
| 200600999 | F    | 58     | BB    | 176     | 174     | 131     | 103     | 134     | 147     |           |     |
| 200601102 | F    | 60     | BB    | 123     | F       | 131     | 103     | 103     | 147     |           |     |
| 200601103 | F    | 65     | BB    | 123     | 222     | 131     | 150     | 134     | 187     |           |     |
| 200601104 | F    | 40     | BB    | 139     | 149     | 162     | 150     | 149?    | 187     |           |     |
| 200600972 | M    | 65     | BB    | 176     | 174     | 140     | 150     | 134     | ?       |           |     |
| 200600978 | M    | 61     | BB    | 176     | 174     | 140     | 150     | 134     | 187     |           |     |
| 200600981 | M    | 62     | BB    | 123     | 222     | 131     | 103     | 134     | 147     |           |     |
| 200600984 | M    | 63     | BB    |         | 174     | 140     |         | 134     | 187     |           |     |
| 200601101 | ?(M) | 59     | BB    | 176     | 174     | 140     | 150     | 134     | 147     |           |     |
| 200600996 | ?    | 60     | BB    | 176     | 222     | 131     | 150     | 134     | 187     |           |     |
| 200601000 | ?    | 62     | BB    | 123     | 222     |         | 103     | 134     |         |           |     |

| UNH2139 | cski | Gm264a |
|---------|------|--------|
| 194     | 213  | 209    |
| 219     | 227  | 229    |
| M 1     | M 2  | M 1    |
| F 9     | F 5  | F 0    |
| Un 2    | Un 1 | Un 1   |
| 221     | 211  | 209    |
| M 0     | M 1  | M 1    |
| F 6     | F 4  | F 1    |
| Un 1    | Un 1 | Un 1   |

| UNH2095 | UNH2086 | UNH2031 |
|---------|---------|---------|
| 103     | 134     | 147     |
| 150     | 140     | 187     |
| M 1     | M 1     | M 1     |
| F 7     | F 5     | F 12    |
| Un 1    | Un 2    | Un 1    |
| 176     | 174     | 140     |
| M 0     | M 3     | M 2     |
| F 1     | F 11    | F 9     |
| Un 2    | Un 1    | Un 1    |

Fisher's Exact using genotypes of all individuals

|                                |                                |                                |
|--------------------------------|--------------------------------|--------------------------------|
| X <sup>2</sup> 2.45<br>P 0.484 | X <sup>2</sup> 5.43<br>P 0.143 | X <sup>2</sup> 1.26<br>P 0.532 |
|--------------------------------|--------------------------------|--------------------------------|

Fisher's Exact using maternal and paternal alleles

|          |                                 |                                 |                                 |
|----------|---------------------------------|---------------------------------|---------------------------------|
| Maternal | X <sup>2</sup> 0.399<br>P 0.527 | X <sup>2</sup> 0.292<br>P 0.589 | X <sup>2</sup> 0.039<br>P 0.844 |
| Paternal | X <sup>2</sup> 0.943<br>P 0.331 | X <sup>2</sup> 1.000<br>P 0.316 | X <sup>2</sup> 1.640<br>P 0.200 |

Fisher's Exact using genotypes of all individuals

|                                |                                |                                |
|--------------------------------|--------------------------------|--------------------------------|
| X <sup>2</sup> 1.22<br>P 0.749 | X <sup>2</sup> 1.01<br>P 0.315 | X <sup>2</sup> 1.22<br>P 0.749 |
|--------------------------------|--------------------------------|--------------------------------|

Fisher's Exact using maternal and paternal alleles

|          |                                 |                                 |                                 |
|----------|---------------------------------|---------------------------------|---------------------------------|
| Maternal | X <sup>2</sup> 0.476<br>P 0.490 | X <sup>2</sup> 1.010<br>P 0.315 | X <sup>2</sup> 0.294<br>P 0.588 |
| Paternal | X <sup>2</sup> 0.011<br>P 0.918 | X <sup>2</sup> NI<br>P Homo     | X <sup>2</sup> 0.063<br>P 0.802 |

S12.1: *Metriaclima phaeos* family A001 genotypes for LG 5 and LG 7.

**M. phaeos**  
**MephNA-A001** Ratio M:F total  
 14M : 18F 35 ind  
 3 Unknown

| LG 5   |      |        |         |      |        | LG 7    |      |        |        |      |        |         |         |         |      |        |     |
|--------|------|--------|---------|------|--------|---------|------|--------|--------|------|--------|---------|---------|---------|------|--------|-----|
| Fish   | Sex  | Length | UNH2139 | cski | GM264A | UNH2139 | cski | GM264A | Fish   | Sex  | Length | UNH2095 | UNH2086 | UNH2031 | Fish | Sex    |     |
| 04L-79 | F    |        | 198     | 217  | 231    | 198     | 217  | 221    | No DNA | M    | 04L-79 | F       | 0       | 185     | 132  | No DNA | M   |
|        |      |        | 215     | 213  | 221    | 198     | 217  | 217    |        |      |        | 121     | 225     | 193     |      |        |     |
| 05L-23 | F    | 66     | 198     | 217  | 231    | 198     | 217  | 221    | 05L-23 | F    | 66     | 0       | 185     | 132     | 98   | 185    | 173 |
| 05L-24 | F    | 72     | 198     | 217  | 221    | 198     | 217  | 221    | 05L-24 | F    | 72     | 121     | 185     | 132     | 157  | 185    | 173 |
| 05L-33 | F    | 64     | 215     | 217  | 231    | 198     | 217  | 221    | 05L-33 | F    | 64     | 0       | 185     | 132     | 98   | 185    | 173 |
| 05L-35 | F    | 75     | 198     | 217  | 221    | 198     | 217  | 221    | 05L-35 | F    | 75     | 121     | 225     | 193     | 98   | 225    | 173 |
| 05L-38 | F    | 75     | 198     | 217  | 221    | 198     | 217  | 221    | 05L-38 | F    | 75     | 0       | 185     | 132     | 98   | 185    | 173 |
| 05L-40 | F    | 73     | 215     | 213  | 221    | 198     | 217  | 221    | 05L-40 | F    | 73     | 0       | 225     | 193     | 157  | 225    | 173 |
| 05L-41 | F    | 69     | 198     | 217  | 231    | 198     | 217  | 221    | 05L-41 | F    | 69     | 0       | 185     | 132     | 98   | 185    | 173 |
| 05L-42 | F    | 72     | 215     | 217  | 221    | 198     | 217  | 221    | 05L-42 | F    | 72     | 0       | 185     | 132     | 157  | 185    | 173 |
| 05L-43 | F    | 70     | 198     | 217  | 221    | 198     | 217  | 221    | 05L-43 | F    | 70     | 121     | 225     | 193     | 98   | 225    | 173 |
| 05L-44 | F    | 73     | 198     | 217  | 231    | 198     | 217  | 217    | 05L-44 | F    | 73     | 121     | 225     | 193     | 98   | 225    | 173 |
| 05L-45 | F    | 67     | 198     | 217  | 221    | 198     | 217  | 221    | 05L-45 | F    | 67     | 0       | 185     | 132     | 98   | 185    | 173 |
| 05L-47 | F    | 74     | 215     | 213  | 221    | 198     | 217  | 221    | 05L-47 | F    | 74     | 121     | 225     | 193     | 98   | 225    | 173 |
| 05L-48 | F    | 74     | 198     | 217  | 231    | 198     | 217  | 217    | 05L-48 | F    | 74     | 121     | 185     | 132     | 157  | 225    | 173 |
| 05L-49 | F    | 58     | 215     | 213  | 221    | 198     | 217  | 221    | 05L-49 | F    | 58     | 121     | 225     | 193     | 157  | 225    | 173 |
| 05L-50 | F    | 69     | 215     | 213  | 221    | 198     | 217  | 217    | 05L-50 | F    | 69     | 121     | 225     | 193     | 98   | 225    | 173 |
| 05L-52 | F    | 63     | 215     | 213  | 221    | 198     | 217  | 221    | 05L-52 | F    | 63     | 0       | 185     | 132     | 98   | 185    | 173 |
| 05L-53 | F    | 67     | 198     | 217  | 221    | 198     | 217  | 221    | 05L-53 | F    | 67     | 121     | 225     | 193     | 98   | 225    | 173 |
| 05L-55 | F    | 70     | 215     | 217  | 221    | 198     | 217  | 221    | 05L-55 | F    | 70     | 0       | 185     | 132     | 98   | 185    | 173 |
| 05L-21 | M    | 75     | 215     | 217  | 221    | 198     | 217  | 221    | 05L-21 | M    | 75     | 0       | 185     | 132     | 157  | 225    | 173 |
| 05L-22 | M    | 87     | 215     | 213  | 221    | 198     | 217  | 221    | 05L-22 | M    | 87     | 0       | 185     | 132     | 157  | 225    | 173 |
| 05L-25 | M    | 80     | 215     | 213  | 231    | 198     | 217  | 217    | 05L-25 | M    | 80     | 0       | 225     | 193     | 157  | 225    | 173 |
| 05L-26 | M    | 76     | 198     | 217  | 231    | 198     | 217  | 217    | 05L-26 | M    | 76     | 121     | 225     | 193     | 157  | 225    | 173 |
| 05L-27 | M    | 81     | 198     | 213  | 221    | 198     | 217  | 221    | 05L-27 | M    | 81     | 0       | 225     | 193     | 157  | 225    | 173 |
| 05L-28 | M    | 82     | 198     | 217  | 231    | 198     | 217  | 217    | 05L-28 | M    | 82     | 0       | 185     | 132     | 157  | 225    | 173 |
| 05L-29 | M    | 82     | 198     | 213  | 221    | 198     | 217  | 221    | 05L-29 | M    | 82     | 0       | 225     | 132     | 157  | 225    | 173 |
| 05L-30 | M    | 79     | 198     | 217  | 231    | 198     | 217  | 217    | 05L-30 | M    | 79     | 121     | 225     | 193     | 157  | 225    | 173 |
| 05L-31 | M    | 79     | 198     | 217  | 221    | 198     | 217  | 221    | 05L-31 | M    | 79     | 121     | 225     | 193     | 98   | 225    | 173 |
| 05L-32 | M    | 75     | 198     | 217  | 231    | 198     | 217  | 221    | 05L-32 | M    | 75     | 121     | 225     | 193     | 98   | 225    | 173 |
| 05L-34 | M    | 76     | 215     | 213  | 221    | 198     | 217  | 221    | 05L-34 | M    | 76     | 121     | 225     | 193     | 157  | 225    | 173 |
| 05L-37 | M    | 81     | 215     | 217  | 231    | 198     | 217  | 221    | 05L-37 | M    | 81     | 121     | 225     | 193     | 157  | 225    | 173 |
| 05L-39 | M    | 76     | 215     | 217  | 221    | 198     | 217  | 221    | 05L-39 | M    | 76     | 121     | 225     | 193     | 98   | 225    | 173 |
| 05L-54 | M    | 76     | 215     | 213  | 221    | 198     | 217  | 221    | 05L-54 | M    | 77     | 0       | 185     | 132     | 157  | 225    | 173 |
| 05L-46 | ?(M) | 77     | 215     | 217  | 231    | 198     | 217  | 221    | 05L-46 | ?(M) | 76     | 121     | 225     | 193     | 157  | 225    | 173 |
| 05L-36 | ?(F) | 79     | 198     | 217  | 231    | 198     | 217  | 217    | 05L-51 | ?    | 71     | 121     | 225     | 193     | 157  | 225    | 173 |
| 05L-51 | ?    | 71     | 215     | 213  | 221    | 198     | 217  | 221    | 05L-36 | ?(F) | 79     | 121     | 225     | 193     | 157  | 225    | 173 |

**UNH 2139** **cski**

|     |                     |     |                     |
|-----|---------------------|-----|---------------------|
| 198 | M 7<br>F 10<br>Un 1 | 213 | M 6<br>F 5<br>Un 1  |
| 215 | M 7<br>F 8<br>Un 1  | 217 | M 8<br>F 13<br>Un 2 |

**GM264a**

|     |                    |                    |                     |
|-----|--------------------|--------------------|---------------------|
| 221 | M 0<br>F 1<br>Un 1 | 221                | M 8<br>F 12<br>Un 1 |
| 231 | M 4<br>F 2<br>Un 1 | M 2<br>F 3<br>Un 1 |                     |

**UNH2095** **UNH2086**

|     |                    |            |            |     |            |     |                    |                     |
|-----|--------------------|------------|------------|-----|------------|-----|--------------------|---------------------|
| 221 | M 4<br>F 3<br>Un 3 | 98         | M 3<br>F 6 | 185 | M 0<br>F 9 | 225 | M 4<br>F 1<br>Un 3 | M 10<br>F 8<br>Un 3 |
| 0   | M 7<br>F 2         | M 0<br>F 7 |            |     |            |     |                    |                     |

**UNH2031**

|     |                     |
|-----|---------------------|
| 132 | M 4<br>F 10<br>Un 3 |
| 193 | M 10<br>F 8<br>Un 3 |

Fisher's Exact using genotypes of all individuals

$X^2$  0.0976 P 0.755  $X^2$  0.794 P 0.373  $X^2$  2.2 P 0.532

Fisher's Exact using maternal and paternal alleles

Maternal  $X^2$  0.098 P 0.755  $X^2$  0.794 P 0.373  $X^2$  0.794 P 0.373  
 Paternal  $X^2$  NI P Homo  $X^2$  NI P Homo  $X^2$  0.653 P 0.419

Fisher's Exact using genotypes of all individuals

$X^2$  10.6 P 0.014  $X^2$  10.7 P 0.005  $X^2$  2.33 P 0.127

Fisher's Exact using maternal and paternal alleles

Maternal  $X^2$  0.00 P 1  $X^2$  2.330 P 0.127  $X^2$  2.330 P 0.127  
 Paternal  $X^2$  8.130 P 0.004  $X^2$  9.740 P 0.002  $X^2$  NI P Homo

S12.2: *Metriclina phaeos* family A006 genotypes for LG 5 and LG 7.

**M. phaeos**  
**Meph-A006** Ratio M:F total  
16M : 15F 34 ind  
3 Unknown

|            |      |        |              | LG 5    |      |        |         |      |        |           |     |        |       |
|------------|------|--------|--------------|---------|------|--------|---------|------|--------|-----------|-----|--------|-------|
| Fish       | Sex  | Length | Color        | UNH2139 | cski | GM264A | UNH2139 | cski | GM264A | Fish      | Sex | Length | Color |
| 2006000091 | F    |        | Yellow       | 218     | 211  | 229    | 222     | 207  | 223    | 200600149 | M   |        |       |
|            |      |        |              | 199     | 214  | 223    | 227     | 206  | 219    |           |     |        |       |
| 200600698  | F    | 42     | Yellow       |         |      |        |         |      |        |           |     |        |       |
| 200600701  | F    | 52     | Brown/Yellow | 218     | 211  | 229    | 222     | 207  | 223    |           |     |        |       |
| 200600705  | F    | 54     | Yellow       | 199     | 214  | 223    | 222     | 206  | 223    |           |     |        |       |
| 200600707  | F    | 46     | Yellow       | 218     | 211  | 229    | 222     | 207  | 219    |           |     |        |       |
| 200600708  | F    | 50     | Yellow       | 199     | 214  |        | 227     | 206  |        |           |     |        |       |
| 200600709  | F    | 42     | Yellow       | 215     | 211  | 223    | 232     | 207  | 223    |           |     |        |       |
| 200600710  | F    | 46     | Yellow       |         |      |        |         |      |        |           |     |        |       |
| 200600717  | F    | 40     | Yellow       |         | 211  | 223    |         | 206  | 219    |           |     |        |       |
| 200600720  | F    | 46     | Yellow       | 218     | 211  | 223    | 222     | 207  | 223    |           |     |        |       |
| 200600721  | F    | 43     | Yellow       | 199     | 214  | 223    | 222     | 206  | 223    |           |     |        |       |
| 200600722  | F    | 45     | Yellow       | 199     | 214  | 229    | 227     | 206  | 219    |           |     |        |       |
| 200600723  | F    | 44     | Yellow       | 218     | 214  | 229    | 227     | 220? | 219    |           |     |        |       |
| 200600724  | F    | 39     | Yellow       | 218     | 211  | 229    | 222     | 207  | 223    |           |     |        |       |
| 200600729  | F    | 47     | Yellow       | 218     | 211  | 223    | 227     | 206  | 223    |           |     |        |       |
| 200600730  | F    | 39     | Yellow       | 218     | 211  | 229    | 222     | 207  | 223    |           |     |        |       |
| 200600690  | M    | 39     | Yellow/Brown | 199     | 214  |        | 222     | 207  |        |           |     |        |       |
| 200600699  | M    | 52     | Yellow       | 218     | 214  | 223    | 222     | 207  | 223    |           |     |        |       |
| 200600700  | M    | 56     | Blue/Yellow  | 199     | 214  | 223    | 222     | 206  | 223    |           |     |        |       |
| 200600703  | M    | 53     | Blue         | 218     | 211  |        | 222     | 207  |        |           |     |        |       |
| 200600704  | M    | 52     | Blue         | 199     | 211  |        | 222     | 207  |        |           |     |        |       |
| 200600706  | M    | 40     | Yellow       | 199     | 214  | 223    | 222     | 206  | 223    |           |     |        |       |
| 200600711  | M    | 42     | Yellow       | 218     | 211  |        | 222     | 206  |        |           |     |        |       |
| 200600712  | M    | 44     | Yellow/Brown | 218     | 211  |        | 222     | 206  |        |           |     |        |       |
| 200600713  | M    | 55     | Blue/Yellow  | 199     | 214  |        | 222     | 207  |        |           |     |        |       |
| 200600714  | M    | 51     | Blue/Yellow  | 218     | 214  | 229    | 222     |      | 223    |           |     |        |       |
| 200600715  | M    | 45     | Yellow       | 199     | 214  | 229    | 227     | 207  | 223    |           |     |        |       |
| 200600719  | M    | 43     | Yellow       | 218     | 211  | 229    | 222     | 207  | 223    |           |     |        |       |
| 200600725  | M    | 42     | Yellow       | 199     | 211  | 229    |         | 207  | 223    |           |     |        |       |
| 200600726  | M    | 54     | Blue         | 199     | 214  | 223    | 227?    | 206  | 219    |           |     |        |       |
| 200600727  | M    | 44     | Yellow       | 218     | 211  | 229    | 227     | 207  | 223    |           |     |        |       |
| 200600728  | M    | 47     | Yellow       | 199     | 211  | 229    | 227     | 207  | 219    |           |     |        |       |
| 200600718  | ?(M) | 38     | Yellow       | 218     | 211  | 229    | 222     | 207  | 223    |           |     |        |       |
| 200600702  | ?    | 46     | Brown/Yellow | 199     | 214  | 229    | 222     | 206  | 223    |           |     |        |       |
| 200600716  | ?    | 41     | Yellow       |         | 214  |        |         |      |        |           |     |        |       |

|            |      |        |              | LG 7    |         |         |         |         |         |           |     |  |
|------------|------|--------|--------------|---------|---------|---------|---------|---------|---------|-----------|-----|--|
| Fish       | Sex  | Length | Color        | UNH2095 | UNH2086 | UNH2031 | UNH2095 | UNH2086 | UNH2031 | Fish      | Sex |  |
| 2006000091 | F    |        | Yellow       | 0       | 220     | 193     | 158     | 193     | 133     | 200600149 | M   |  |
|            |      |        |              | 98      | 0       | 174     | 121     | 147     | 193     |           |     |  |
| 200600698  | F    | 42     | Yellow       |         |         |         |         |         |         |           |     |  |
| 200600701  | F    | 52     | Brown/Yellow | 0       | 220     | 193     | 121     | 147     | 193     |           |     |  |
| 200600705  | F    | 54     | Yellow       | 98      | 0       | 174     | 121     | 147     | 193     |           |     |  |
| 200600707  | F    | 46     | Yellow       | 98      | 0       | 174     | 121     | 147     | 193     |           |     |  |
| 200600708  | F    | 50     | Yellow       | 98      | 0       | 174     | 121     | 147     | 193     |           |     |  |
| 200600709  | F    | 42     | Yellow       | 98      | 0       | 174     | 121     | 147     | 193     |           |     |  |
| 200600710  | F    | 46     | Yellow       |         |         |         |         |         |         |           |     |  |
| 200600717  | F    | 40     | Yellow       | 0       | 220     | 193     | 121     | 147     | 193     |           |     |  |
| 200600720  | F    | 46     | Yellow       | 98      | 0       | 174     | 121     | 147     | 193     |           |     |  |
| 200600721  | F    | 43     | Yellow       | 98      | 0       | 174     | 121     | 147     | 193     |           |     |  |
| 200600722  | F    | 45     | Yellow       | 0       | 220     | 174     | 121     | 147     | 193     |           |     |  |
| 200600723  | F    | 44     | Yellow       | 0       | 220     | 193     | 121     | 147     | 193     |           |     |  |
| 200600724  | F    | 39     | Yellow       | 0       | 220     | 193     | 121     | 147     | 193     |           |     |  |
| 200600729  | F    | 47     | Yellow       | 0       | 220     | 193     | 121     | 147     | 193     |           |     |  |
| 200600730  | F    | 39     | Yellow       | 0       | 220     | 193     | 121     | 147     | 193     |           |     |  |
| 200600690  | M    | 39     | Yellow/Brown | 0       | 220     | 193     | 158     | 193     | 133     |           |     |  |
| 200600699  | M    | 52     | Yellow       | 98      | 0       | 174     | 158     | 193     | 133     |           |     |  |
| 200600700  | M    | 56     | Blue/Yellow  | 98      | 0       | 174     | 158     | 193     | 133     |           |     |  |
| 200600703  | M    | 53     | Blue         | 0       | 220     | 193     | 158     | 193     | 133     |           |     |  |
| 200600704  | M    | 52     | Blue         | 0       | 220     | 193     | 158     | 193     | 133     |           |     |  |
| 200600706  | M    | 40     | Yellow       | 0       | 220     | 193     | 158     | 193     | 133     |           |     |  |
| 200600711  | M    | 42     | Yellow       | 98      | 0       | 174     | 158     | 193     | 133     |           |     |  |
| 200600712  | M    | 44     | Yellow/Brown | 0       | 220     | 193     | 158     | 193     | 133     |           |     |  |
| 200600713  | M    | 55     | Blue/Yellow  | 0       | 220     | 193     | 158     | 193     | 133     |           |     |  |
| 200600714  | M    | 51     | Blue/Yellow  | 98      | 0       | 174     | 158     | 193     | 133     |           |     |  |
| 200600715  | M    | 45     | Yellow       | 0       | 220     | 193     | 158     | 193     | 133     |           |     |  |
| 200600719  | M    | 43     | Yellow       | 0       | 220     | 193     | 158     | 193     | 133     |           |     |  |
| 200600725  | M    | 42     | Yellow       | 98      | 0       | 174     | 158     | 193     | 133     |           |     |  |
| 200600726  | M    | 54     | Blue         | 98      | 0       | 193     | 158     | 193     | 133     |           |     |  |
| 200600727  | M    | 44     | Yellow       | 98      | 0       | 193     | 158     | 193     | 133     |           |     |  |
| 200600728  | M    | 47     | Yellow       | 98      | 0       | 193     | 158     | 193     | 133     |           |     |  |
| 200600718  | ?(M) | 38     | Yellow       | 98      | 0       | 174     | 158     | 193     | 133     |           |     |  |
| 200600702  | ?    | 46     | Brown/Yellow | 0       | 220     | 193     | 121     | 147     | 193     |           |     |  |
| 200600716  | ?    | 41     | Yellow       | 98      | 0       | 174     | 158     | 193     | 133     |           |     |  |

| UNH2139                   | cski                      | GM264A                    |
|---------------------------|---------------------------|---------------------------|
| 218<br>M 6<br>F 5<br>Un 1 | 211<br>M 2<br>F 2         | 229<br>M 5<br>F 3<br>Un 2 |
| 199<br>M 5<br>F 2<br>Un 1 | 214<br>M 3<br>F 4<br>Un 1 | 223<br>M 3<br>F 5         |

Fisher's Exact using genotypes of all individuals

|  |                                |                                |                                |
|--|--------------------------------|--------------------------------|--------------------------------|
|  | X <sup>2</sup> 1.33<br>P 0.723 | X <sup>2</sup> 3.01<br>P 0.391 | X <sup>2</sup> 1.83<br>P 0.608 |
|--|--------------------------------|--------------------------------|--------------------------------|

Fisher's Exact using maternal and paternal alleles

|          |                                 |                                 |                                 |
|----------|---------------------------------|---------------------------------|---------------------------------|
| Maternal | X <sup>2</sup> 0.735<br>P 0.391 | X <sup>2</sup> 0.386<br>P 0.534 | X <sup>2</sup> 0.220<br>P 0.639 |
| Paternal | X <sup>2</sup> 0.280<br>P 0.597 | X <sup>2</sup> 0.540<br>P 0.462 | X <sup>2</sup> 0.489<br>P 0.484 |

| UNH2095                  | UNH2086                   | UNH2031                   |
|--------------------------|---------------------------|---------------------------|
| 0<br>M 9<br>F 0<br>Un 1  | 121<br>M 0<br>F 7<br>Un 1 | 193<br>M 8<br>F 7<br>Un 1 |
| 98<br>M 8<br>F 0<br>Un 1 | 0<br>M 8<br>F 0<br>Un 2   | 174<br>M 0<br>F 6<br>Un 1 |

Fisher's Exact using genotypes of all individuals

|  |                               |                               |                               |
|--|-------------------------------|-------------------------------|-------------------------------|
|  | X <sup>2</sup> 29<br>P <.0001 | X <sup>2</sup> 29<br>P <.0001 | X <sup>2</sup> 29<br>P <.0001 |
|--|-------------------------------|-------------------------------|-------------------------------|

Fisher's Exact using maternal and paternal alleles

|          |                                  |                                  |                                  |
|----------|----------------------------------|----------------------------------|----------------------------------|
| Maternal | X <sup>2</sup> 0.017<br>P 0.897  | X <sup>2</sup> 0.043<br>P 0.837  | X <sup>2</sup> 1.510<br>P 0.219  |
| Paternal | X <sup>2</sup> 29.00<br>P <.0001 | X <sup>2</sup> 29.00<br>P <.0001 | X <sup>2</sup> 29.00<br>P <.0001 |

S13.1: *Metriclina pyrsonotus* family A002 genotypes for LG 5 and LG 7.

| <i>M. pyrsonotus</i> |     |        |       | Ratio M:F |      | total  |         |      |        |           |     |        |       |         |         |         |         |         |         |         |         |           |     |
|----------------------|-----|--------|-------|-----------|------|--------|---------|------|--------|-----------|-----|--------|-------|---------|---------|---------|---------|---------|---------|---------|---------|-----------|-----|
| <b>Mepy-A002</b>     |     |        |       | 14M : 5F  |      | 19 ind |         |      |        |           |     |        |       |         |         |         |         |         |         |         |         |           |     |
| LG 5                 |     |        |       |           |      |        |         | LG 7 |        |           |     |        |       |         |         |         |         |         |         |         |         |           |     |
| Fish                 | Sex | Length | Color | UNH2139   | cski | GM264A | UNH2139 | cski | GM264A | Fish      | Sex | Length | Color | UNH 973 | UNH2095 | UNH2086 | UNH2031 | UNH 973 | UNH2095 | UNH2086 | UNH2031 | Fish      | Sex |
| 20050055             | F   |        | BB    | 202       | 215  | 221    | 217     | 213  | 195    | 200505054 | M   |        | BB    | 143     | 136     | 198     | 159     | 170     | 146     | 185     | 173     | 200505054 | M   |
|                      |     |        |       | 194       | 223  | 232    | 202     | 215  | 243    |           |     |        |       | 160     | 110     | 214     | 173     | 139     | 146     | 130     | 168     |           |     |
| 200600230            | F   | 50     | BB    | 194       | 215  | 232    | 217     | 213  | 195    | 200600230 | F   | 50     | BB    | 160     | 110     | 214     | 173     | 170     | 146     | 185     | 173     |           |     |
| 200600231            | F   | 49     | BB    | 194       | 215  | 221    | 202     | 213  | 243    | 200600231 | F   | 49     | BB    | 160     | 110     | 214     | 173     | 139     | 146     | 130     | 168     |           |     |
| 200600233            | F   | 51     | BB    | 202       | 215  |        | 217     | 215  |        | 200600233 | F   | 51     | BB    | 160     | 152?    | 162?    | 192?    | 139     | 152?    | 162?    | 192?    |           |     |
| 200600234            | F   | 41     | BB    | 194       | 215  | 232    | 217     | 215  | 195    | 200600234 | F   | 41     | BB    | 160     | 110     | 198     | 159     | 170     | 146     | 185     | 173     |           |     |
| 200600242            | F   | 50     | BB    | 202       | 215  | 221    | 217     | 213  | 243    | 200600242 | F   | 50     | BB    | 143     | 136     | 198     | 159     | 139     | 146     | 130     | 168     |           |     |
| 200600224            | M   | 56     | BB    | 202       | 215  | 221    | 217     | 213  | 195    | 200600224 | M   | 56     | BB    | 143     | 110     | 214     | 173     | 139     | 146     | 130     | 168     |           |     |
| 200600225            | M   | 53     | BB    | 202       | 215  | 221    | 217     | 213  | 195    | 200600225 | M   | 53     | BB    | 143     | 136     | 198     | 159     | 170     | 146     | 185     | 173     |           |     |
| 200600226            | M   | 65     | BB    | 202       | 223  | 232    | 202     | 213  | 243    | 200600226 | M   | 65     | BB    | 110     | 214     | 173     | 139     | 146     | 168?    | 149?    |         |           |     |
| 200600227            | M   | 57     | BB    | 202       | 215  | 221    | 217     | 213  | 195    | 200600227 | M   | 57     | BB    | 143     | 136     | 198     | 159     | 139     | 146     | 185     | 173     |           |     |
| 200600228            | M   | 56     | BB    | 202       | 215  | 221    | 202     | 215  | 243    | 200600228 | M   | 56     | BB    | 160     | 110     | 214     | 173     | 170     | 146     | 185     | 173     |           |     |
| 200600229            | M   | 52     | BB    | 202       | 223  | 221    | 202     | 215  | 243    | 200600229 | M   | 52     | BB    | 143     | 136     | 198     | 159     | 139     | 160?    | 130     | 154?    |           |     |
| 200600232            | M   | 53     | BB    | 202       | 215  | 221    | 217     | 213  | 195    | 200600232 | M   | 53     | BB    | 160     | 110     | 214     | 173     | 170     | 146     | 185     | 173     |           |     |
| 200600235            | M   | 50     | BB    | 202       | 215  |        | 217     | 213  |        | 200600235 | M   | 50     | BB    | 143     | 110     | 214     | 173     | 139     | 146     | 130     | 168     |           |     |
| 200600236            | M   | 62     | BB    | 202       | 215  | 232    | 202     | 213  | 243    | 200600236 | M   | 62     | BB    | 160     | 110     | 214     | 173     | 139     | 146     | 130     | 168     |           |     |
| 200600237            | M   | 50     | BB    | 194       | 215  | 221    | 217     | 215  | 195    | 200600237 | M   | 50     | BB    | 160     | 110     | 214     | 173     | 170     | 146     | 185     | 173     |           |     |
| 200600238            | M   | 51     | BB    | 194       | 215  | 232    | 217     | 215  | 195    | 200600238 | M   | 51     | BB    | 143     | 136     | 198     | 173     | 170     | 146     | 185     | 168     |           |     |
| 200600239            | M   | 60     | BB    | 202       | 215  | 232    | 202     | 213  | 243    | 200600239 | M   | 60     | BB    | 143     | 136     | 198     | 159     | 139     | 146     | 130     | 168     |           |     |
| 200600240            | M   | 58     | BB    | 194       | 215  | 232    | 202     | 213  | 243    | 200600240 | M   | 58     | BB    | 143     | 136     | 198     | 159     | 170     | 146     | 185     | 173     |           |     |
| 200600241            | M   | 57     | BB    | 202       | 215  | 221    | 217     | 213  | 195    | 200600241 | M   | 57     | BB    | 143     | 136     | 198     | 159     | 139     | 146     | 130     | 168     |           |     |

  

| UNH 2139 |     |     | cski |     |     | GM264A |     |     | UNH 973 |     |     | UNH2095 |     |     | UNH2086 |     |     | UNH2031 |     |  |
|----------|-----|-----|------|-----|-----|--------|-----|-----|---------|-----|-----|---------|-----|-----|---------|-----|-----|---------|-----|--|
| 202      | 217 | 202 | 215  | 213 | 215 | 221    | 195 | 243 | 143     | 139 | 170 | 110     | 146 | 130 | 185     | 159 | 173 | 168     | 168 |  |
| M 6      | M 5 | F 1 | M 9  | M 3 | M 3 | M 6    | M 2 | M 6 | M 3     | M 4 | M 7 | M 3     | M 4 | M 3 | M 4     | M 3 | M 2 | M 2     | M 2 |  |
| F 1      | F 1 | F 1 | F 3  | F 2 | F 2 | F 0    | F 2 | F 1 | F 0     | F 1 | F 0 | F 3     | F 1 | F 1 | F 1     | F 1 | F 1 | F 1     | F 1 |  |
| 194      | M 2 | M 1 | M 1  | M 1 | M 1 | M 1    | M 4 | M 1 | M 3     | M 3 | M 3 | M 6     | M 3 | M 3 | M 3     | M 3 | M 4 | M 4     | M 4 |  |
|          | F 2 | F 1 | F 0  | F 0 | F 0 | F 2    | F 0 | F 1 | F 2     | F 1 | F 2 | F 1     | F 1 | F 1 | F 1     | F 1 | F 1 | F 1     | F 1 |  |

  

| Fisher's Exact using genotypes of all individuals |                     |                     | Fisher's Exact using genotypes of all individuals |                      |                      |
|---------------------------------------------------|---------------------|---------------------|---------------------------------------------------|----------------------|----------------------|
| X <sup>2</sup> 2.55                               | X <sup>2</sup> 1.21 | X <sup>2</sup> 7.74 | X <sup>2</sup> 0.565                              | X <sup>2</sup> 0.049 | X <sup>2</sup> 0.178 |
| P 0.467                                           | P 0.751             | P 0.052             | P 0.452                                           | P 0.997              | P 0.981              |

  

| Fisher's Exact using maternal and paternal alleles |                      |                      | Fisher's Exact using maternal and paternal alleles |                       |                      |
|----------------------------------------------------|----------------------|----------------------|----------------------------------------------------|-----------------------|----------------------|
| Maternal                                           | X <sup>2</sup> 2.54  | X <sup>2</sup> 0.798 | Maternal                                           | X <sup>2</sup> 0.46   | X <sup>2</sup> 2.460 |
|                                                    | P 0.111              | P 0.372              |                                                    | P 0.116               | P 0.116              |
| Paternal                                           | X <sup>2</sup> 0.012 | X <sup>2</sup> 0.516 | Paternal                                           | X <sup>2</sup> 0.0182 | X <sup>2</sup> NI    |
|                                                    | P 0.912              | P 0.473              |                                                    | P 0.893               | P Homo               |
|                                                    |                      |                      |                                                    |                       | X <sup>2</sup> 0.018 |
|                                                    |                      |                      |                                                    |                       | P 0.893              |
|                                                    |                      |                      |                                                    |                       | X <sup>2</sup> 0.000 |
|                                                    |                      |                      |                                                    |                       | P 1                  |

1  
2  
3  
4  
5  
6  
7  
8  
9  
10  
11  
12  
13  
14  
15  
16  
17  
18  
19  
20  
21  
22  
23  
24  
25  
26  
27  
28  
29  
30  
31  
32  
33  
34  
35  
36  
37  
38  
39  
40  
41  
42  
43  
44  
45  
46  
47  
48  
49

S13.2: *Metriaclima pyrrsonotus* family A006 genotypes for LG 5 and LG 7.

**M. pyrrsonotus** Ratio M:F total  
**Mepy-A006** 2M : 12F 14 ind

**LG 5**

| Fish      | Sex | Length | Color | UNH2139    | cski       | GM264A     | UNH2139    | cski       | GM264A     | Fish      | Sex | Color |
|-----------|-----|--------|-------|------------|------------|------------|------------|------------|------------|-----------|-----|-------|
| 2005-5121 |     |        | BB    | 194<br>202 | 216<br>216 | 221<br>201 | 217<br>202 | 213<br>215 | 195<br>243 | 2005-5054 | M   | BB    |
| 200600571 | F   | 56     | BB    | 194        | 216        | 221        | 202        | 215        | 243        |           |     |       |
| 200600572 | F   | 45     | BB    | 202        | 216        |            | 202        | 215        |            |           |     |       |
| 200600573 | F   | 55     | BB    | 194        | 216        | 221        | 217        | 213        | 195        |           |     |       |
| 200600574 | F   | 57     | BB    | 202        | 216        |            | 217        | 213        |            |           |     |       |
| 200600575 | F   | 49     | BB    | 202        | 216        |            | 217        | 213        |            |           |     |       |
| 200600576 | F   | 56     | BB    | 202        | 216        | 221        | 217        | 213        | 243        |           |     |       |
| 200600577 | F   | 54     | BB    | 194        | 216        | 221        | 217        | 213        | 195        |           |     |       |
| 200600578 | F   | 50     | BB    |            | 216        | 221        |            | 215        | 243        |           |     |       |
| 200600579 | F   | 59     | BB    | 194        | 216        | 221        | 202        | 213        | 243        |           |     |       |
| 200600580 | F   | 50     | BB    | 194        | 216        | 221        | 202        | 213        | 243        |           |     |       |
| 200600581 | F   | 54     | BB    | 202        | 216        | 201        | 202        | 215        |            |           |     |       |
| 200600582 | F   | 53     | BB    | 202        | 216        | 201        | 217        | 213        | 195        |           |     |       |
| 200600570 | M   | 43     | BB    |            |            |            |            |            |            |           |     |       |
| 200600583 | M   | 60     | BB    | 194        | 216        | 221        | 217        | 213        | 195        |           |     |       |

**UNH2139**

|     |     |     |
|-----|-----|-----|
| 194 | M 1 | M 0 |
|     | F 2 | F 3 |
| 202 | M 0 | M 0 |
|     | F 4 | F 2 |

**cski**

|     |     |     |
|-----|-----|-----|
| 216 | M 1 | M 0 |
|     | F 7 | F 5 |

**GM264A**

|     |     |     |
|-----|-----|-----|
| 221 | M 1 | M 0 |
|     | F 2 | F 5 |
| 201 | M 0 | M 0 |
|     | F 1 | F 0 |

Fisher's Exact using genotypes of all individuals

$X^2$  3.27  
P 0.351

$X^2$  0.677  
P 0.411

$X^2$  2.25  
P 0.325

**LG 7**

| Fish      | Sex | Length | Color | UNH2095     | UNH2086    | UNH2031    | UNH2095 | UNH2086 | UNH2031 | Fish      | Sex | Color |
|-----------|-----|--------|-------|-------------|------------|------------|---------|---------|---------|-----------|-----|-------|
| 2005-5121 |     |        | BB    | 146<br>157? | 161<br>154 | 154<br>139 | 146     | 185     | 173     | 2005-5054 | M   | BB    |
| 200600571 | F   | 56     | BB    | 146         | 161        | 139        | 146     | 130     | 168     |           |     |       |
| 200600572 | F   | 45     | BB    | 146         | 154        | 205?       | 146     | 185     | 162?    |           |     |       |
| 200600573 | F   | 55     | BB    | 146         | 161        | 139        | 146     | 185     | 173     |           |     |       |
| 200600574 | F   | 57     | BB    | 146         | 161        | 154        | 146     | 185     | 173     |           |     |       |
| 200600575 | F   | 49     | BB    | 157         | 161        | 154        | 146     | 130     | 168     |           |     |       |
| 200600576 | F   | 56     | BB    | 157         | 161        | 154        | 146     | 130     | 168     |           |     |       |
| 200600577 | F   | 54     | BB    | 146         | 161        |            | 146     | 185     |         |           |     |       |
| 200600578 | F   | 50     | BB    | 146         | 161        | 154        | 146     | 185     | 173     |           |     |       |
| 200600579 | F   | 59     | BB    | 146         | 161        | 139        | 146     | 185     | 173     |           |     |       |
| 200600580 | F   | 50     | BB    | 146         | 161        | 139        | 146     | 185     | 173     |           |     |       |
| 200600581 | F   | 54     | BB    | 157         | 161        | 154        | 146     | 185     | 173     |           |     |       |
| 200600582 | F   | 53     | BB    | 157         | 161        | 154        | 146     | 130     | 168     |           |     |       |
| 200600570 | M   | 43     | BB    | 146         | 154        | 162?       | 146     |         | 173     |           |     |       |
| 200600583 | M   | 60     | BB    | 157         | 161        | 154        | 146     | 185     | 173     |           |     |       |

**UNH2095**

|     |     |     |
|-----|-----|-----|
| 146 | M 1 | M 0 |
|     | F 8 | F 5 |
| 157 | M 1 | M 0 |
|     | F 1 | F 0 |

**UNH2086**

|     |     |     |
|-----|-----|-----|
| 161 | M 1 | M 0 |
|     | F 7 | F 4 |
| 154 | M 0 | M 0 |
|     | F 1 | F 0 |

**UNH2031**

|     |     |     |
|-----|-----|-----|
| 139 | M 1 | M 0 |
|     | F 3 | F 3 |
|     | M 0 | M 0 |
|     | F 3 | F 1 |

Fisher's Exact using genotypes of all individuals

$X^2$  1.66  
P 0.197

$X^2$  0.677  
P 0.713

$X^2$  1.92  
P 0.588

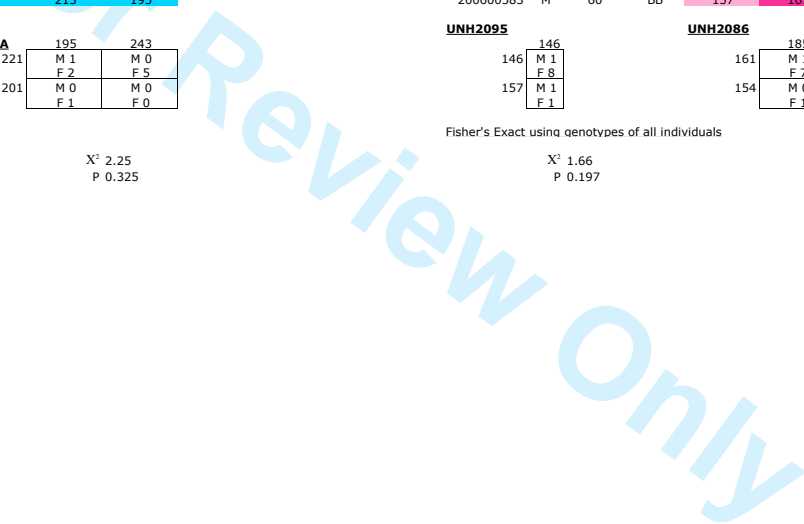

S13.3: *Metriaclicma pyrsonotus* family A010 genotypes for LG 5 and LG 7.

| <b>M. pyrsonotus</b> |     |        |       |         |      |         |         |      |        | Ratio M:F   |     |       | total     |     |         |         |         |         |         |         |         |         |        |     |       |
|----------------------|-----|--------|-------|---------|------|---------|---------|------|--------|-------------|-----|-------|-----------|-----|---------|---------|---------|---------|---------|---------|---------|---------|--------|-----|-------|
| <b>Mepy-A010</b>     |     |        |       |         |      |         |         |      |        | OM : 22F    |     |       | 22 ind    |     |         |         |         |         |         |         |         |         |        |     |       |
| <b>LG 5</b>          |     |        |       |         |      |         |         |      |        | <b>LG 7</b> |     |       |           |     |         |         |         |         |         |         |         |         |        |     |       |
| Fish                 | Sex | Length | Color | UNH2139 | cski | GM264A  | UNH2139 | cski | GM264A | Fish        | Sex | Color | Fish      | Sex | Length  | Color   | UNH2095 | UNH2086 | UNH2031 | UNH2095 | UNH2086 | UNH2031 | Fish   | Sex | Color |
| 200600147            | F   |        | BB    | 194     | 215  | 220     | 208     | 219  | 226    | No DNA      | M   | BB    | 200600147 | F   |         | BB      | 160     | 161     | 154     | 160     | 204     | 156     | No DNA | M   | BB    |
|                      |     |        |       | 202     | 219  | 198     | 202     | 213  | 250    |             |     |       |           |     |         |         | 160     | 157     | 137     | 160     | 141     | 162     |        |     |       |
| 200600948            | F   | 51     | BB    | 194     | 215  | 220     | 202     | 213  | 250    | 200600948   | F   | 51    | BB        | 160 | 161     | 154     | 160     | 161     | 154     | 160     | 204     | 156     |        |     |       |
| 200600949            | F   | 55     | BB    | 194     | 219  | 220     | 208     | 219  | 226    | 200600949   | F   | 55    | BB        | 160 | 157     | 137     | 160     | 157     | 137     | 160     | 141     | 162     |        |     |       |
| 200600950            | F   | 57     | BB    | 202     | 219  |         | 208     | 213  |        | 200600950   | F   | 57    | BB        | 160 | 157     | 137     | 160     | 157     | 137     | 160     | 204     | 156     |        |     |       |
| 200600951            | F   | 56     | BB    | 202     | 219  |         | 208     | 213  |        | 200600951   | F   | 56    | BB        | 160 | 161     | 154     | 160     | 161     | 154     | 160     | 141     | 162     |        |     |       |
| 200600952            | F   | 53     | BB    | 194     | 219  | 220     | 202     | 213  | 250    | 200600952   | F   | 53    | BB        | 160 | 161     | 137     | 160     | 161     | 137     | 160     | 141     | 162     |        |     |       |
| 200600953            | F   | 61     | BB    | 202     | 219  |         | 208     | 213  |        | 200600953   | F   | 61    | BB        | 160 | 161     | 154     | 160     | 161     | 154     | 160     | 141     | 162     |        |     |       |
| 200600954            | F   | 59     | BB    | 194     | 215  |         | 208     | 213  |        | 200600954   | F   | 59    | BB        | 160 | 161     | 137     | 160     | 161     | 137     | 160     | 204     | 156     |        |     |       |
| 200600955            | F   | 53     | BB    | 194     | 215  | 220     | 208     | 219  | 226    | 200600955   | F   | 53    | BB        | 160 | 157     | 137     | 160     | 157     | 137     | 160     | 141     | 162     |        |     |       |
| 200600956            | F   | 58     | BB    | 202     | 219  | 198     | 202     | 213  | 250    | 200600956   | F   | 58    | BB        | 160 | 161     | 137     | 160     | 161     | 137     | 160     | 204     | 156     |        |     |       |
| 200600957            | F   | 63     | BB    | 194     | 215  |         | 202     | 219  |        | 200600957   | F   | 63    | BB        | 160 | 157     | 137     | 160     | 157     | 137     | 160     | 141     | 162     |        |     |       |
| 200600958            | F   | 55     | BB    | 202     | 219  | 198     | 208     | 219  | 226    | 200600958   | F   | 55    | BB        | 160 | 161     | 154     | 160     | 161     | 154     | 160     | 204     | 156     |        |     |       |
| 200600959            | F   | 45     | BB    | 202     | 215  | 198     | 202     | 219  | 250    | 200600959   | F   | 45    | BB        | 160 | 157     | 137     | 160     | 157     | 137     | 160     | 204     | 156     |        |     |       |
| 200600960            | F   | 42     | BB    | 194     | 215  | 198/220 | 208     | 219  | 226    | 200600960   | F   | 42    | BB        | 160 | 157/161 | 137/154 | 160     | 157/161 | 137/154 | 160     | 141     | 162     |        |     |       |
| 200600961            | F   | 40     | BB    | 202     | 215  | 220     | 208     | 219  | 250    | 200600961   | F   | 40    | BB        | 160 | 161     | 154     | 160     | 161     | 154     | 160     | 141     | 162     |        |     |       |
| 200600962            | F   | 62     | BB    | 202     | 219  | 198     | 208     | 219  | 226    | 200600962   | F   | 62    | BB        | 160 | 161     | 154     | 160     | 161     | 154     | 160     | 141     | 162     |        |     |       |
| 200600963            | F   | 46     | BB    | 202     | 215  | 220     | 202     | 219  | 226    | 200600963   | F   | 46    | BB        | 160 | 161     | 154     | 160     | 161     | 154     | 160     | 204     | 156     |        |     |       |
| 200600964            | F   | 46     | BB    | 194     | 219  | 220     | 202     | 213  | 250    | 200600964   | F   | 46    | BB        | 160 | 157     | 137     | 160     | 157     | 137     | 160     | 141     | 162     |        |     |       |
| 200600965            | F   | 52     | BB    | 194     | 219  | 198     | 202     | 213  | 250    | 200600965   | F   | 52    | BB        | 160 | 161     | 137     | 160     | 161     | 137     | 160     | 141     | 162     |        |     |       |
| 200600966            | F   | 45     | BB    | 194     | 215  |         | 208     | 219  |        | 200600966   | F   | 45    | BB        | 160 | 157     | 137     | 160     | 157     | 137     | 160     | 141     | 162     |        |     |       |
| 200600967            | F   | 48     | BB    | 194     | 219  | 220     | 202     | 213  | 250    | 200600967   | F   | 48    | BB        | 160 | 161     | 154     | 160     | 161     | 154     | 160     | 141     | 162     |        |     |       |
| 200600968            | F   | 37     | BB    | 194     | 215  |         | 208     | 219  |        | 200600968   | F   | 37    | BB        | 160 | 161     | 154     | 160     | 161     | 154     | 160     | 204     | 156     |        |     |       |
| 200600969            | F   | 41     | BB    | 194     | 215  | 220     | 202     | 219  | 250    | 200600969   | F   | 41    | BB        | 160 | 161     | 154     | 160     | 161     | 154     | 160     | 204     | 156     |        |     |       |

  

| <b>UNH2139</b> |     |     | <b>cski</b> |     |     | <b>GM264A</b> |     |     | <b>UNH2095</b> |     |     | <b>UNH2086</b> |     |     | <b>UNH2031</b> |     |     |
|----------------|-----|-----|-------------|-----|-----|---------------|-----|-----|----------------|-----|-----|----------------|-----|-----|----------------|-----|-----|
| 194            | M 0 | M 0 | 215         | M 0 | M 0 | 220           | M 0 | M 0 | 160            | M 0 | M 0 | 161            | M 0 | M 0 | 154            | M 0 | M 0 |
|                | F 6 | F 7 |             | F 9 | F 2 |               | F 3 | F 6 |                | F 7 | F 7 |                | F 7 | F 7 |                | F 5 | F 5 |
| 202            | M 0 | M 0 | 219         | M 0 | M 0 | 198           | M 0 | M 0 |                | M 0 | M 0 |                | M 0 | M 0 | 137            | M 0 | M 0 |
|                | F 6 | F 3 |             | F 3 | F 8 |               | F 2 | F 3 |                | F 2 | F 5 |                | F 4 | F 7 |                | F 4 | F 7 |

Fisher's Exact using genotypes of all individuals

$X^2$  0  
P 1

S13.4: *Metriaclima pyrsonotus* family A013 genotypes for LG 5 and LG 7.

**M. pyrsonotus** Ratio M:F total  
**Mepy-A013** OM : 29F 29 ind

| LG 5      |     |        |       |         |      |        |         |      |        | LG 7      |     |        |       |         |         |         |         |         |         |        |     |       |
|-----------|-----|--------|-------|---------|------|--------|---------|------|--------|-----------|-----|--------|-------|---------|---------|---------|---------|---------|---------|--------|-----|-------|
| Fish      | Sex | Length | Color | UNH2139 | cski | Gm264a | UNH2139 | cski | Gm264a | Fish      | Sex | Length | Color | UNH2095 | UNH2086 | UNH2031 | UNH2095 | UNH2086 | UNH2031 | Fish   | Sex | Color |
| 200600162 | F   |        | BB    | 213     | 219  | 224    | 207     | 215  | 227    | 200600162 | F   |        | BB    | 152     | 159     | 151     | 148     | 204     | 156     | No DNA | M   | BB    |
|           |     |        |       | 209     | 213  | 238    | 202     | 213  | 250    |           |     |        |       | 127     | 169     | 158     | 127     | 141     | 162     |        |     |       |
| 200601212 | F   | 50     | BB    | 213     | 219  | 224    | 202     | 213  | 250    | 200601212 | F   | 50     | BB    | 152     | 159     | 151     | 148     | 204     | 156     |        |     |       |
| 200601213 | F   | 46     | BB    | 213     | 219  | 224    | 207     | 215  | 227    | 200601213 | F   | 46     | BB    | 127     | 169     | 158     | 127     | 141     | 162     |        |     |       |
| 200601214 | F   | 47     | BB    | 213     | 219  | 224    | 207     | 215  | 227    | 200601214 | F   | 47     | BB    | 127     | 169     | 158     | 127     | 141     | 162     |        |     |       |
| 200601215 | F   | 47     | BB    | 213     | 219  | 224    | 207     | 215  | 227    | 200601215 | F   | 47     | BB    | 152     | 169     | 158     | 148     | 141     | 162     |        |     |       |
| 200601216 | F   | 41     | BB    | 213     | 219  | 224    | 202     | 213  | 227    | 200601216 | F   | 41     | BB    | 152     | 159     | 151     | 148     | 141     | 162     |        |     |       |
| 200601217 | F   | 50     | BB    | 213     | 219  | 224    | 207     | 215  | 250    | 200601217 | F   | 50     | BB    | 152     | 159     | 151     | 148     | 204     | 156     |        |     |       |
| 200601218 | F   | 48     | BB    | 213     | 219  | 224    | 202     | 213  | 250    | 200601218 | F   | 48     | BB    | 152     | 159     | 151     | 148     | 204     | 156     |        |     |       |
| 200601219 | F   | 47     | BB    | 209     | 219  | 238    | 207     | 215  | 227    | 200601219 | F   | 47     | BB    | 127     | 169     | 158     | 127     | 204     | 156     |        |     |       |
| 200601220 | F   | 66     | BB    | 209     | 219  | 216?   | 230?    | 215  | 216?   | 200601220 | F   | 66     | BB    |         |         |         |         |         |         |        |     |       |
| 200601221 | F   | 43     | BB    | 213     | 219  | 238    | 207     | 215  | 250    | 200601221 | F   | 43     | BB    | 127     | 169     | 158     | 127     | 204     | 156     |        |     |       |
| 200601222 | F   | 43     | BB    | 213     | 219  | 224    | 202     | 213  | 250    | 200601222 | F   | 43     | BB    | 127     | 169     | 158     | 127     | 141     | 162     |        |     |       |
| 200601223 | F   | 46     | BB    | 213     | 213  | 224    | 207     | 215  | 227    | 200601223 | F   | 46     | BB    | 152     | 159     |         | 148     | 204     |         |        |     |       |
| 200601224 | F   | 49     | BB    | 213     | 213  | 224    | 207     | 215  | 227    | 200601224 | F   | 49     | BB    | 152     | 159     | 151     | 148     | 141     | 162     |        |     |       |
| 200601225 | F   | 44     | BB    | 213     | 219  | 224    | 202     | 213  | 227    | 200601225 | F   | 44     | BB    |         | 159     | 151     |         | 204     | 156     |        |     |       |
| 200601226 | F   | 47     | BB    | 213     | 213  | 224    | 207     | 215  | 250    | 200601226 | F   | 47     | BB    | 152     | 159     | 151     | 148     | 141     | 162     |        |     |       |
| 200601227 | F   | 42     | BB    | 209     | 213  | 224    | 207     | 215  | 227    | 200601227 | F   | 42     | BB    | 127     | 169     | 158     | 127     | 204     | 156     |        |     |       |
| 200601228 | F   | 40     | BB    | 209     | 219  |        | 202     | 213  |        | 200601228 | F   | 40     | BB    | 152     | 159     | 151     | 148     | 141     | 162     |        |     |       |
| 200601229 | F   | 37     | BB    | 213     |      | 224    | 207     |      | 227    | 200601229 | F   | 37     | BB    | 152     | 159     | 151     | 148     | 204     | 156     |        |     |       |
| 200601230 | F   | 39     | BB    | 213     | 213  |        | 207     | 213  |        | 200601230 | F   | 39     | BB    | 152     | 159     | 151     | 148     | 204     | 156     |        |     |       |
| 200601231 | F   | 51     | BB    | 213     | 219  |        | 202     | 213  |        | 200601231 | F   | 51     | BB    |         | 169     | 158     |         | 204     | 156     |        |     |       |
| 200601232 | F   | 49     | BB    | 209     | 219  | 238    | 207     | 213  | 227    | 200601232 | F   | 49     | BB    | 152     | 159     | 151     | 148     | 204     | 156     |        |     |       |
| 200601233 | F   | 42     | BB    | 209     | 219  |        | 202     | 213  |        | 200601233 | F   | 42     | BB    |         |         |         |         |         |         |        |     |       |
| 200601234 | F   | 44     | BB    | 209     | 213  | 238    | 202     | 213  | 227    | 200601234 | F   | 44     | BB    | 127     | 169     | 158     | 127     | 141     | 162     |        |     |       |
| 200601235 | F   | 47     | BB    | 213     | 213  | 224    | 202     | 213  | 250    | 200601235 | F   | 47     | BB    | 152     | 159     | 151     | 148     | 204     | 156     |        |     |       |
| 200601236 | F   | 45     | BB    | 213     | 219  | 238    | 202     | 213  | 227    | 200601236 | F   | 45     | BB    | 127     | 169     | 158     | 127     | 204     | 156     |        |     |       |
| 200601237 | F   | 45     | BB    | 209     | 213  | 238    | 202     | 213  | 250    | 200601237 | F   | 45     | BB    | 152     | 159     | 151     | 148     | 141     | 162     |        |     |       |
| 200601238 | F   | 40     | BB    | 213     | 219  | 224    | 207     | 215  | 227    | 200601238 | F   | 40     | BB    | 152     | 159     | 151     | 148     | 204     | 156     |        |     |       |
| 200601239 | F   | 42     | BB    | 209     | 219  | 238    | 202     | 213  | 250    | 200601239 | F   | 42     | BB    | 127     | 169     | 158     | 148     | 141     | 162     |        |     |       |
| 200601240 | F   | 35     | BB    | 213     | 219  | 224    | 207     | 215  | 227    | 200601240 | F   | 35     | BB    | 127     | 169     | 158     | 127     | 204     | 156     |        |     |       |

**UNH2139**

|         |     |
|---------|-----|
| 207     | 202 |
| 213 M 0 | M 0 |
| F 12    | F 8 |
| 209 M 0 | M 0 |
| F 3     | F 4 |

**cski**

|         |      |
|---------|------|
| 215     | 213  |
| 219 M 0 | M 0  |
| F 9     | F 11 |
| 213 M 0 | M 0  |
| F 4     | F 4  |

**Gm264a**

|         |     |
|---------|-----|
| 227     | 250 |
| 224 M 0 | M 0 |
| F 11    | F 6 |
| 238 M 0 | M 0 |
| F 4     | F 3 |

**UNH2095**

|         |     |
|---------|-----|
| 148     | 127 |
| 152 M 0 | M 0 |
| F 15    | F 0 |
| 127 M 0 | M 0 |
| F 1     | F 9 |

**UNH2086**

|         |     |
|---------|-----|
| 204     | 141 |
| 159 M 0 | M 0 |
| F 10    | F 5 |
| 169 M 0 | M 0 |
| F 6     | F 6 |

**UNH2031**

|         |     |
|---------|-----|
| 156     | 162 |
| 151 M 0 | M 0 |
| F 9     | F 5 |
| 158 M 0 | M 0 |
| F 6     | F 6 |

Fisher's Exact using genotypes of all individuals

Fisher's Exact using genotypes of all individuals

X<sup>2</sup> 0  
P 1

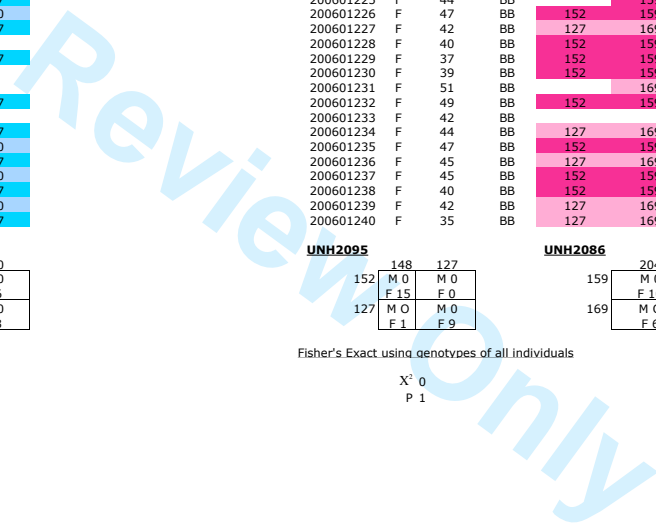

S13.5: *Metriaclima pyronotus* family A014 genotypes for LG 5 and LG 7.

| <b>M. pyronotus</b> |     |        |       |         |      |        |         |      |        | Ratio M:F | total  |        |       |         |         |         |           |     |       |    |  |  |
|---------------------|-----|--------|-------|---------|------|--------|---------|------|--------|-----------|--------|--------|-------|---------|---------|---------|-----------|-----|-------|----|--|--|
| <b>Mepy-A014</b>    |     |        |       |         |      |        |         |      |        | 4M : 24F  | 29 ind |        |       |         |         |         |           |     |       |    |  |  |
|                     |     |        |       |         |      |        |         |      |        | LG 5      |        |        |       |         | LG 7    |         |           |     |       |    |  |  |
| Fish                | Sex | Length | Color | UNH2139 | cski | Gm264a | UNH2139 | cski | Gm264a | Fish      | Sex    | Length | Color | UNH2095 | UNH2086 | UNH2031 | Fish      | Sex | Color |    |  |  |
| 200600196           | F   |        | BB    | 194     | 220  | 197    | 196     | 220  | 236    | 200600196 | F      |        | BB    | 141     | 150     | 192     | 20055049  | M   | BB    |    |  |  |
|                     |     |        |       | 213     | 211  | 221    | 202     | 228  | 219    |           |        |        |       | 0?      | 230     | 137     |           |     |       |    |  |  |
| 200700631           | F   | 52     | BB    | 194     | 220  | 221    | 202     | 228  | 219    | 200700631 | F      | 52     | BB    | 141     | 150     | 192     | 200700631 | F   | 52    | BB |  |  |
| 200700632           | F   | 55     | BB    | 194     | 220  | 221    | 196     | 220  | 236    | 200700632 | F      | 55     | BB    | 0       | 230     | 137     | 200700632 | F   | 55    | BB |  |  |
| 200700633           | F   | 51     | BB    | 194     | 220  | 197    | 196     | 220  | 236    | 200700633 | F      | 51     | BB    |         | 150     | 192     | 200700633 | F   | 51    | BB |  |  |
| 200700634           | F   | 51     | BB    | 194     | 220  | 197    | 202     | 220  | 219    | 200700634 | F      | 51     | BB    | 0       | 230     | 137     | 200700634 | F   | 51    | BB |  |  |
| 200700635           | F   | 53     | BB    | 194     | 220  | 197    | 202     | 228  | 236    | 200700635 | F      | 53     | BB    | 141     | 150     | 192     | 200700635 | F   | 53    | BB |  |  |
| 200700636           | F   | 52     | BB    | 194     | 220  | 197    | 196     | 220  | 236    | 200700636 | F      | 52     | BB    | 141     | 150     | 192     | 200700636 | F   | 52    | BB |  |  |
| 200700637           | F   | 48     | BB    | 213     | 211  | 197    | 202     | 228  | 219    | 200700637 | F      | 48     | BB    | 141     | 140?    | 192     | 200700637 | F   | 48    | BB |  |  |
| 200700638           | F   | 50     | BB    | 194     | 220  | 197    | 196     | 220  | 236    | 200700638 | F      | 50     | BB    | 141     | 150     | 192     | 200700638 | F   | 50    | BB |  |  |
| 200700640           | F   | 57     | BB    | 194     | 220  | 197    | 196     | 220  | 236    | 200700640 | F      | 57     | BB    | 141     | 230     | 137     | 200700640 | F   | 57    | BB |  |  |
| 200700643           | F   | 48     | BB    | 213     | 211  | 221    | 202     |      | 219    | 200700643 | F      | 48     | BB    | 0       | 230     | 137     | 200700643 | F   | 48    | BB |  |  |
| 200700644           | F   | 52     | BB    | 213     | 211  | 221    | 202     | 228  | 219    | 200700644 | F      | 52     | BB    | 0       | 230     | 137     | 200700644 | F   | 52    | BB |  |  |
| 200700645           | F   | 54     | BB    | 213     | 211  | 221    | 202     | 228  | 219    | 200700645 | F      | 54     | BB    | 0       | 230     | 137     | 200700645 | F   | 54    | BB |  |  |
| 200700646           | F   | 52     | BB    | 194     | 220  | 197    | 202     | 228  | 219    | 200700646 | F      | 52     | BB    | 141     | 150     | 192     | 200700646 | F   | 52    | BB |  |  |
| 200700648           | F   | 52     | BB    | 194     | 220  | 197    | 202     | 228  | 219    | 200700648 | F      | 52     | BB    | 141     | 150     | 192     | 200700648 | F   | 52    | BB |  |  |
| 200700649           | F   | 55     | BB    | 213     | 211  | 221    | 202     | 228  | 219    | 200700649 | F      | 55     | BB    | 141     | 150     | 192     | 200700649 | F   | 55    | BB |  |  |
| 200700650           | F   | 51     | BB    | 194     | 220  | 197    | 196     | 220  | 236    | 200700650 | F      | 51     | BB    | 141     | 150     | 192     | 200700650 | F   | 51    | BB |  |  |
| 200700651           | F   | 46     | BB    | 194     | 220  | 197    | 202     | 228  | 219    | 200700651 | F      | 46     | BB    | 141     | 150     | 192     | 200700651 | F   | 46    | BB |  |  |
| 200700652           | F   | 50     | BB    | 213     | 211  | 197    | 196     | 220  | 236    | 200700652 | F      | 50     | BB    | 0       | 230     | 137     | 200700652 | F   | 50    | BB |  |  |
| 200700653           | F   | 51     | BB    | 194     | 220  | 221    | 202     | 228  | 219    | 200700653 | F      | 51     | BB    | 0       | 230     | 137     | 200700653 | F   | 51    | BB |  |  |
| 200700654           | F   | 48     | BB    | 213     | 211  | 221    | 202     |      | 219    | 200700654 | F      | 48     | BB    | 0       | 230     | 137     | 200700654 | F   | 48    | BB |  |  |
| 200700655           | F   | 54     | BB    | 213     | 211  | 221    | 202     | 220  | 236    | 200700655 | F      | 54     | BB    | 141     | 150     | 192     | 200700655 | F   | 54    | BB |  |  |
| 200700656           | F   | 49     | BB    | 213     | 211  | 221    | 202     | 220  | 236    | 200700656 | F      | 49     | BB    | 0       | 230     | 137     | 200700656 | F   | 49    | BB |  |  |
| 200700657           | F   | 50     | BB    | 213     | 211  | 197    | 196     | 220  | 236    | 200700657 | F      | 50     | BB    | 0       | 230     | 137     | 200700657 | F   | 50    | BB |  |  |
| 200700658           | F   | 53     | BB    | 213     | 211  | 221    | 196     | 228  | 219    | 200700658 | F      | 53     | BB    | 141     | 150     | 192     | 200700658 | F   | 53    | BB |  |  |
| 200700639           | M   | 59     | BB    | 194     |      | 197    | 202     |      | 219    | 200700639 | M      | 59     | BB    | 141     | 150     | 192     | 200700639 | M   | 59    | BB |  |  |
| 200700641           | M   | 55     | BB    | 194     | 220  | 197    | 202     | 220  | 219    | 200700641 | M      | 55     | BB    | 0       | 230     | 137     | 200700641 | M   | 55    | BB |  |  |
| 200700642           | M   | 58     | BB    | 194     | 220  | 221    | 196     | 220  | 236    | 200700642 | M      | 58     | BB    | 141     | 150     | 192     | 200700642 | M   | 58    | BB |  |  |
| 200700647           | M   | 55     | BB    | 213     | 211  | 221    | 196     | 220  | 236    | 200700647 | M      | 55     | BB    | 141     | 150     | 137     | 200700647 | M   | 55    | BB |  |  |

| UNH2139 |     | cski |     | Gm264a |     |
|---------|-----|------|-----|--------|-----|
| 194     | M 1 | M 2  | 220 | M 2    | M 0 |
|         | F 6 | F 7  |     | F 7    | F 6 |
| 213     | M 1 | M 0  | 211 | M 1    | M 0 |
|         | F 2 | F 7  |     | F 3    | F 4 |

| UNH2095 |     | UNH2086 |     | UNH2031 |     |
|---------|-----|---------|-----|---------|-----|
| 141     | M 2 | M 1     | 154 | M 2     | M 1 |
|         | F 7 | F 6     |     | F 7     | F 6 |
| 0       | M 0 | M 1     | 230 | M 1     | M 0 |
|         | F 6 | F 4     |     | F 5     | F 5 |

Fisher's Exact using genotypes of all individuals

|                     |                     |                     |
|---------------------|---------------------|---------------------|
| X <sup>2</sup> 2.34 | X <sup>2</sup> 2.67 | X <sup>2</sup> 8.17 |
| P 0.504             | P 0.445             | P 0.043             |

Fisher's Exact using maternal and paternal alleles

|          |                      |                      |                      |
|----------|----------------------|----------------------|----------------------|
| Maternal | X <sup>2</sup> 0.362 | X <sup>2</sup> 0.169 | X <sup>2</sup> 0.024 |
|          | P 0.547              | P 0.681              | P 0.877              |
| Paternal | X <sup>2</sup> 0.266 | X <sup>2</sup> 2.650 | X <sup>2</sup> 0.059 |
|          | P 0.606              | P 0.103              | P 0.809              |

Fisher's Exact using genotypes of all individuals

|                     |                     |                      |
|---------------------|---------------------|----------------------|
| X <sup>2</sup> 1.54 | X <sup>2</sup> 1.28 | X <sup>2</sup> 0.778 |
| P 0.672             | P 0.734             | P 0.855              |

Fisher's Exact using maternal and paternal alleles

|          |                      |                      |                      |
|----------|----------------------|----------------------|----------------------|
| Maternal | X <sup>2</sup> 0.112 | X <sup>2</sup> 0.482 | X <sup>2</sup> 0.097 |
|          | P 0.738              | P 0.488              | P 0.755              |
| Paternal | X <sup>2</sup> 0.059 | X <sup>2</sup> 0.862 | X <sup>2</sup> 0.233 |
|          | P 0.809              | P 0.353              | P 0.629              |



S13.6: *Metriaclima pyrrsonotus* family A017 genotypes for LG 5 and LG 7.

**M. pyrrsonotus** Ratio M:F total  
**Mepy-A017** 8M : 17F 25 ind

| LG 5      |     |        |       |         |      |        |         |      |        | LG 7                 |     |        |       |         |         |         |         |         |         |                      |     |       |
|-----------|-----|--------|-------|---------|------|--------|---------|------|--------|----------------------|-----|--------|-------|---------|---------|---------|---------|---------|---------|----------------------|-----|-------|
| Fish      | Sex | Length | Color | UNH2139 | cski | Gm264a | UNH2139 | cski | Gm264a | Fish                 | Sex | Length | Color | UNH2095 | UNH2086 | UNH2031 | UNH2095 | UNH2086 | UNH2031 | Fish                 | Sex | Color |
| 200600388 | F   |        | BB    | 220     | 220  | 238    | 196     | 220  | 236    | 20055049             | M   |        | BB    | 142     | 145     | 181     | 154     | 178     | 137     | 20055049             | M   | BB    |
|           |     |        |       | 190     | 228  | 202    | 202     | 228  | 219    |                      |     |        |       | 133     | 182     | 168     | 144     | 168     | 193     |                      |     |       |
| 200700501 | F   | 52     | BB    | 190     | 220  | 238    | 196     | 220  | 236    |                      |     | 52     | BB    | 142     | 145     | 181     | 144     | 168     | 193     |                      |     |       |
| 200700502 | F   | 54     | BB    | 220     | 220  | 238    | 219     | 220  | 219    | see eggs             |     | 54     | BB    | 142     | 145     | 181     | 154     | 178     | 137     | see eggs             |     |       |
| 200700503 | F   | 49     | BB    | 190     | 220  | 238    | 196     | 220  | 236    |                      |     | 49     | BB    | 142     | 145     | 181     | 154     | 178     | 137     |                      |     |       |
| 200700506 | F   | 52     | BB    | 220     | 220  | 202    | 196     | 220  | 236    | see developed eggs   |     | 52     | BB    | 133     | 182     | 168     | 154     | 178     | 137     | see developed eggs   |     |       |
| 200700507 | F   | 50     | BB    | 190     | 220  | 238    | 196     | 220  | 236    |                      |     | 50     | BB    | 142     | 145     | 181     | 144     | 168     | 193     |                      |     |       |
| 200700510 | F   | 47     | BB    | 220     | 220  | 202    | 196     | 220  | 236    |                      |     | 47     | BB    | 142     | 145     | 181     | 144     | 168     | 193     |                      |     |       |
| 200700512 | F   | 50     | BB    | 190     | 220  | 238    | 196     | 220  | 219    | see eggs             |     | 50     | BB    | 142     | 145     | 181     | 154     | 178     | 137     | see eggs             |     |       |
| 200700513 | F   | 50     | BB    | 220     | 220  | 238    | 228     | 219  | 219    | see eggs             |     | 50     | BB    | 133     | 182     | 168     | 144     | 168     | 193     | see eggs             |     |       |
| 200700514 | F   | 48     | BB    | 220     | 220  | 238    | 196     | 220  | 236    |                      |     | 48     | BB    | 133     | 182     | 168     | 144     | 168     | 193     |                      |     |       |
| 200700515 | F   | 46     | BB    | 220     | 220  | 202    | 196     | 220  | 236    | see eggs             |     | 46     | BB    | 133     | 182     | 168     | 144     | 168     | 193     | see eggs             |     |       |
| 200700516 | F   | 56     | BB    | 220     | 220  | 238    | 228     | 219  | 219    |                      |     | 56     | BB    | 142     | 145     | 181     | 144     | 168     | 193     |                      |     |       |
| 200700517 | F   | 47     | BB    | 220     | 220  | 238    | 202     | 228  | 219    |                      |     | 47     | BB    | 142     | 182     | 168     | 144     | 168     | 193     |                      |     |       |
| 200700519 | F   | 46     | BB    | 190     | 220  | 202    | 202     | 228  | 219    |                      |     | 46     | BB    | 133     | 182     | 168     | 144     | 168     | 193     |                      |     |       |
| 200700520 | F   | 51     | BB    |         | 228  | 202    |         | 220  | 219    |                      |     | 51     | BB    | 133     | 182     | 168     | 144     | 168     | 193     |                      |     |       |
| 200700521 | F   | 43     | BB    | 220     | 220  | 202    | 196     | 220  | 236    |                      |     | 43     | BB    | 142     | 145     | 181     | 144     | 168     | 193     |                      |     |       |
| 200700522 | F   | 54     | BB    |         | 220  | 202    | 202     | 228  | 219    |                      |     | 54     | BB    | 133     | 182     | 168     | 144     | 168     | 193     |                      |     |       |
| 200700523 | F   | 52     | BB    | 220     | 220  | 202    | 196     | 220  | 236    |                      |     | 52     | BB    | 133     | 182     | 168     | 144     | 168     | 193     |                      |     |       |
| 200601499 | M   | 55     | BB    |         | 220  | 238    |         | 220  | 236    |                      |     | 55     | BB    | 133     | 182     | 168     | 154     | 178     | 137     |                      |     |       |
| 200601500 | M   | 58     | BB    | 220     | 220  | 238    | 196     | 220  | 219    | see developed testes |     | 58     | BB    | 142     | 145     | 181     | 144     | 168     | 193     | see developed testes |     |       |
| 200700504 | M   | 59     | BB    |         | 220  | 202    |         | 228  | 219    |                      |     | 59     | BB    | 142     | 145     | 181     | 154     | 178     | 137     |                      |     |       |
| 200700505 | M   | 56     | BB    |         | 220  | 202    |         | 220  | 236    |                      |     | 56     | BB    | 133     | 182     | 168     | 154     | 178     | 137     |                      |     |       |
| 200700508 | M   | 60     | BB    | 220     | 220  | 202    | 202     | 228  | 219    |                      |     | 60     | BB    | 133     | 182     | 168     | 154     | 178     | 137     |                      |     |       |
| 200700509 | M   | 53     | BB    | 220     | 220  | 202    | 202     | 228  | 219    |                      |     | 53     | BB    | 142     | 145     | 181     | 154     | 178     | 137     |                      |     |       |
| 200700511 | M   | 55     | BB    | 190     | 220  | 238    | 202     | 228  | 219    |                      |     | 55     | BB    | 142     | 145     | 181     | 154     | 178     | 137     |                      |     |       |
| 200700518 | M   | 57     | BB    | 190     | 220  | 238    | 202     | 228  | 219    |                      |     | 57     | BB    | 142     | 145     | 181     | 154     | 178     | 137     |                      |     |       |

| UNH2139 | cski | Gm264a |
|---------|------|--------|
| 196     | 220  | 236    |
| 220     | 228  | 219    |
| M 1     | M 3  | M 3    |
| F 6     | F 11 | F 5    |
| M 0     | M 5  | M 3    |
| F 4     | F 6  | F 3    |

Fisher's Exact using genotypes of all individuals

|            |             |            |
|------------|-------------|------------|
| $X^2$ 6.45 | $X^2$ 1.637 | $X^2$ 1.98 |
| P 0.092    | P 0.201     | P 0.576    |

Fisher's Exact using maternal and paternal alleles

|          |             |          |             |
|----------|-------------|----------|-------------|
| Maternal | $X^2$ 0.005 | $X^2$ NI | $X^2$ 0.019 |
|          | P 0.949     | P Het    | P 0.891     |
| Paternal | $X^2$ 4.920 | $X^2$ NI | $X^2$ 1.720 |
|          | P 0.026     | P Het    | P 0.189     |

| UNH2095 | UNH2086 | UNH2031 |
|---------|---------|---------|
| 154     | 178     | 137     |
| 142     | 145     | 181     |
| M 3     | M 3     | M 2     |
| F 3     | F 4     | F 5     |
| M 3     | M 3     | M 0     |
| F 3     | F 2     | F 6     |

Fisher's Exact using genotypes of all individuals

|            |            |            |
|------------|------------|------------|
| $X^2$ 4.07 | $X^2$ 5.04 | $X^2$ 6.46 |
| P 0.254    | P 0.169    | P 0.091    |

Fisher's Exact using maternal and paternal alleles

|          |              |             |             |
|----------|--------------|-------------|-------------|
| Maternal | $X^2$ 0.0996 | $X^2$ 0.202 | $X^2$ 0.202 |
|          | P 0.752      | P 0.653     | P 0.653     |
| Paternal | $X^2$ 4.540  | $X^2$ 3.440 | $X^2$ 5.940 |
|          | P 0.033      | P 0.064     | P 0.015     |

S13.7: *Metriclima pyrsonotus* family Rmpy007 genotypes for LG 5 and LG 7.

| <i>M. pyrsonotus</i><br>Rmpy007 |      |        |       | Ratio M:F<br>5M : 10F<br>3 Unknown | total<br>18 ind | LG 5   |         |      |        | LG 7      |      |       |         |         |         |         |      |     |       |     |     |
|---------------------------------|------|--------|-------|------------------------------------|-----------------|--------|---------|------|--------|-----------|------|-------|---------|---------|---------|---------|------|-----|-------|-----|-----|
| Fish                            | Sex  | Length | Color | UNH2139                            | cski            | GM264A | UNH2139 | cski | GM264A | Fish      | Sex  | Color | UNH 973 | UNH2095 | UNH2086 | UNH2031 | Fish | Sex | Color |     |     |
| 20055167                        | F    |        | OB    | 169                                | 216             | 236    | 196     | 221  | 219    | 20055049  | M    | BB    | 152     | 154     | 136     | 163     | 182  | 154 | 178   | 137 |     |
|                                 |      |        |       | 227                                | 216             | 219    | 202     | 229  | 236    |           |      |       | 121     | 144     | 206     | 163     | 143  | 144 | 168   | 193 |     |
| 200600243                       | F    | 34     | OB    | 169                                | 216             | 236    | 196     | 221  | 236    | 200600243 | F    | 34    | OB      | 152     | 154     | 136     | 163  | 182 | 154   | 178 | 137 |
| 200600244                       | F    | 35     | OB    | 169                                | 216             | 236    | 202     | 229  | 219    | 200600244 | F    | 35    | OB      | 152     | 154     | 136     | 163  | 182 | 154   | 178 | 137 |
| 200600245                       | F    | 40     | OB    | 169                                | 216             | 236    | 202     | 229  | 219    | 200600245 | F    | 40    | OB      | 152     | 154     | 136     | 163  | 143 | 144   | 168 | 193 |
| 200600246                       | F    | 41     | OB    | 169                                | 216             | 236    | 196     | 221  | 219    | 200600246 | F    | 41    | OB      | 152     | 154     | 136     | 163  | 182 | 154   | 178 | 137 |
| 200600247                       | F    | 45     | OB    | 169                                | 216             | 236    | 196     | 221  | 236    | 200600247 | F    | 45    | OB      | 152     | 154     | 136     | 163  | 143 | 144   | 168 | 193 |
| 200600248                       | F    | 37     | OB    | 169                                | 216             | 236    | 202     | 229  | 219    | 200600248 | F    | 37    | OB      | 121     | 144     | 206     | 163  | 182 | 154   | 178 | 137 |
| 200600252                       | F    | 49     | BB    | 227                                | 216             | 219    | 196     | 221  | 236    | 200600252 | F    | 49    | BB      | 121     | 144     | 206     | 163  | 143 | 144   | 168 | 193 |
| 200600253                       | F    | 38     | BB    | 227                                | 216             | 219    | 196     | 221  | 236    | 200600253 | F    | 38    | BB      | 121     | 144     | 206     | 163  | 143 | 144   | 168 | 193 |
| 200600254                       | F    | 37     | BB    | 227                                | 216             | 219    | 196     | 221  | 236    | 200600254 | F    | 37    | BB      | 152     | 154     | 136     | 163  | 143 | 144   | 168 | 193 |
| 200600260                       | F    | 35     | BB    | 227                                | 216             | 219    | 196     | 221  | 219    | 200600260 | F    | 35    | BB      | 121     | 144     | 206     | 163  | 143 | 144   | 168 | 193 |
| 200600249                       | M    | 48     | BB    | 227                                | 216             | 219    | 202     | 229  | 219    | 200600249 | M    | 48    | BB      | 152     | 154     | 136     | 163  | 182 | 154   | 178 | 137 |
| 200600250                       | M    | 51     | BB    | 227                                | 216             | 219    | 196     | 221  | 236    | 200600250 | M    | 51    | BB      | 121     | 144     | 206     | 163  | 182 | 154   | 178 | 137 |
| 200600255                       | M    | 46     | BB    | 227                                | 216             | 219    | 196     | 221  | 236    | 200600255 | M    | 46    | BB      | 152     | 154     | 136     | 163  | 182 | 154   | 178 | 137 |
| 200600256                       | M    | 46     | BB    | 227                                | 216             | 219    | 196     | 221  | 219    | 200600256 | M    | 46    | BB      | 152     | 154     | 136     | 163  | 182 | 154   | 178 | 137 |
| 200600259                       | M    | 55     | BB    | 227                                | 216             | 219    | 202     | 229  | 219    | 200600259 | M    | 55    | BB      | 121     | 144     | 206     | 163  | 182 | 154   | 178 | 137 |
| 200600251                       | (M)? | 44     | BB    | 227                                | 216             | 219    | 196     | 221  | 219    | 200600251 | (M)? | 44    | BB      | 121     | 144     | 206     | 163  | 143 | 144   | 168 | 193 |
| 200600257                       | (M)? | 45     | BB    | 227                                | 216             | 219    | 202     | 229  | 219    | 200600257 | (M)? | 45    | BB      | 152     | 154     | 136     | 163  | 182 | 154   | 178 | 137 |
| 200600258                       | ?    | 42     | BB    | 227                                | 216             | 219    | 202     | 229  | 219    | 200600258 | ?    | 42    | BB      | 121     | 144     | 206     | 163  | 182 | 154   | 178 | 137 |

UNH 2139

|      |      |     |
|------|------|-----|
| 169  | 196  | 202 |
| M 0  | M 0  |     |
| F 3  | F 3  |     |
| M 3  | M 2  |     |
| F 4  | F 0  |     |
| Un 1 | Un 2 |     |

cski

|      |      |     |
|------|------|-----|
| 216  | 221  | 229 |
| M 3  | M 2  |     |
| F 7  | F 3  |     |
| Un 1 | Un 2 |     |

GM264A

|      |      |     |
|------|------|-----|
| 236  | 236  | 219 |
| M 0  | M 0  |     |
| F 2  | F 1  |     |
| M 2  | M 3  |     |
| F 7  | F 1  |     |
| Un 1 | Un 3 |     |

Fisher's Exact using genotypes of all individuals

|            |            |            |
|------------|------------|------------|
| $X^2$ 7.29 | $X^2$ 0.15 | $X^2$ 7.63 |
| P 0.063    | P 0.699    | P 0.022    |

Fisher's Exact using maternal and paternal alleles

|          |                        |                        |                   |
|----------|------------------------|------------------------|-------------------|
| Maternal | $X^2$ 5.000<br>P 0.025 | $X^2$ NI<br>P Homo     | $X^2$ NI<br>P Het |
| Paternal | $X^2$ 0.150<br>P 0.699 | $X^2$ 0.150<br>P 0.699 | $X^2$ NI<br>P Het |

UNH 973

|      |      |     |
|------|------|-----|
| 152  | 182  | 143 |
| M 3  | M 3  | M 0 |
| F 3  | F 3  | F 3 |
| Un 1 | Un 1 |     |
| 121  | M 2  | M 0 |
| F 1  | F 1  | F 3 |
| Un 1 | Un 1 |     |

UNH2095

|      |      |     |
|------|------|-----|
| 154  | 154  | 144 |
| M 3  | M 3  |     |
| F 3  | F 3  |     |
| Un 1 | Un 1 |     |
| 144  | M 2  | M 0 |
| F 4  | F 3  | F 3 |
| Un 1 | Un 1 |     |

Fisher's Exact using genotypes of all individuals

|            |            |            |         |
|------------|------------|------------|---------|
| $X^2$ 5.25 | $X^2$ 2.25 | $X^2$ 5.25 | $X^2$ 5 |
| P 0.154    | P 0.325    | P 0.154    | P 0.025 |

Fisher's Exact using maternal and paternal alleles

|          |                    |                   |                        |                        |
|----------|--------------------|-------------------|------------------------|------------------------|
| Maternal | $X^2$ 0<br>P 1     | $X^2$ NI<br>P Het | $X^2$ 0<br>P 1         | $X^2$ NI<br>P Homo     |
| Paternal | $X^2$ 5<br>P 0.025 | $X^2$ NI<br>P Het | $X^2$ 5.000<br>P 0.025 | $X^2$ 5.000<br>P 0.025 |

UNH 973

|      |      |     |
|------|------|-----|
| 152  | 182  | 143 |
| M 3  | M 3  | M 0 |
| F 0  | F 0  | F 1 |
| Un 1 | Un 1 |     |
| 121  | M 2  | M 0 |
| F 0  | F 1  | F 3 |
| Un 1 | Un 1 |     |

UNH2095

|      |      |     |
|------|------|-----|
| 154  | 154  | 144 |
| M 3  | M 3  |     |
| F 0  | F 0  |     |
| Un 1 | Un 1 |     |
| 144  | M 2  | M 0 |
| F 1  | F 1  | F 3 |
| Un 1 | Un 1 |     |

Fisher's Exact using genotypes of BB females and all males

|         |           |            |         |
|---------|-----------|------------|---------|
| $X^2$ 9 | $X^2$ 6.3 | $X^2$ 9.78 | $X^2$ 9 |
| P 0.029 | P 0.043   | P 0.021    | P 0.003 |

Fisher's Exact using maternal and paternal alleles

|          |                      |                   |                        |                        |
|----------|----------------------|-------------------|------------------------|------------------------|
| Maternal | $X^2$ 1.1<br>P 0.294 | $X^2$ NI<br>P Het | $X^2$ 1.100<br>P 0.294 | $X^2$ NI<br>P Homo     |
| Paternal | $X^2$ 9<br>P 0.003   | $X^2$ NI<br>P Het | $X^2$ 9.000<br>P 0.003 | $X^2$ 9.000<br>P 0.003 |

UNH2086

|      |      |     |
|------|------|-----|
| 136  | 178  | 168 |
| M 3  | M 3  | M 0 |
| F 3  | F 3  | F 3 |
| Un 1 | Un 1 |     |
| 206  | M 2  | M 0 |
| F 1  | F 3  | F 3 |
| Un 1 | Un 1 |     |

UNH2031

|      |      |     |
|------|------|-----|
| 163  | 193  | 137 |
| M 0  | M 5  |     |
| F 6  | F 4  |     |
| Un 1 | Un 2 |     |

UNH2086

|      |      |     |
|------|------|-----|
| 136  | 178  | 168 |
| M 3  | M 3  | M 0 |
| F 0  | F 0  | F 3 |
| Un 1 | Un 1 |     |
| 206  | M 2  | M 1 |
| F 0  | F 4  | F 4 |
| Un 1 | Un 1 |     |

UNH2031

|      |      |     |
|------|------|-----|
| 163  | 193  | 137 |
| M 0  | M 5  |     |
| F 4  | F 0  |     |
| Un 1 | Un 2 |     |

1  
2  
3  
4  
5  
6  
7  
8  
9  
10  
11  
12  
13  
14  
15  
16  
17  
18  
19  
20  
21  
22  
23  
24  
25  
26  
27  
28  
29  
30  
31  
32  
33  
34  
35  
36  
37  
38  
39  
40  
41  
42  
43  
44  
45  
46  
47  
48  
49

S13.8: *Metriaclima pyrsonotus* RMpy011 genotypes for LG 5 and LG 7.

**M. pyrsonotus**  
RMpy011

Ratio M:F  
OM : 11F  
total  
11 ind

LG 5

| Fish      | Sex | Length | Color | UNH2139 | cski | Gm264a | UNH2139 | cski | Gm264a | Fish     | Sex | Color |
|-----------|-----|--------|-------|---------|------|--------|---------|------|--------|----------|-----|-------|
| 200600075 | F   |        | OB    | 217     | 216  | 220    | 196     | 221  | 236    | 20055049 | M   | BB    |
|           |     |        |       | 224     | 220  | 192    | 202     | 229  | 219    |          |     |       |
| 200601172 | F   | 57     | OB    | 217     | 220  |        | 196     | 221  | 236    |          |     |       |
| 200601173 | F   | 44     | OB    | 217     | 220  | 220    | 202     | 229  | 219    |          |     |       |
| 200601174 | F   | 44     | OB    | 217     | 216  | 220    | 196     | 229  | 236    |          |     |       |
| 200601175 | F   | 41     | OB    | 217     | 216  | 220    | 196     | 221  | 236    |          |     |       |
| 200601176 | F   | 40     | OB    | 217     |      | 220    | 196     |      | 236    |          |     |       |
| 200601177 | F   | 42     | BB    | 217     | 220  | 192    | 202     | 229  | 219    |          |     |       |
| 200601178 | F   | 41     | BB    | 224     | 220  | 192    | 196     | 229  | 236    |          |     |       |
| 200601179 | F   | 41     | BB    | 224     | 220  |        | 196     | 221  |        |          |     |       |
| 200601180 | F   | 46     | BB    | 224     | 220  | 192    | 202     | 229  | 219    |          |     |       |
| 200601181 | F   | 48     | BB    | 224     | 220  | 192    | 202     | 229  | 219    |          |     |       |
| 200601182 | F   | 45     | BB    | 224     | 208? | 192    | 196     | 221  | 236    |          |     |       |

**UNH2139**

|     |     |     |
|-----|-----|-----|
| 217 | M 0 | M 0 |
|     | F 4 | F 2 |
| 224 | M 0 | M 0 |
|     | F 3 | F 2 |

**cski**

|     |     |     |
|-----|-----|-----|
| 216 | M 0 | M 0 |
|     | F 1 | F 1 |
| 220 | M 0 | M 0 |
|     | F 3 | F 4 |

**Gm264a**

|     |     |     |
|-----|-----|-----|
| 220 | M 0 | M 0 |
|     | F 3 | F 1 |
| 192 | M 0 | M 0 |
|     | F 2 | F 3 |

Fisher's Exact using genotypes of all individuals

X<sup>2</sup>: 0  
P: 1

X<sup>2</sup>: 0  
P: 1

X<sup>2</sup>: 0  
P: 1

LG 7

| Fish      | Sex | Length | Color | UNH2095 | UNH2086 | UNH2031 | UNH2095 | UNH2086 | UNH2031 | Fish     | Sex | Color |
|-----------|-----|--------|-------|---------|---------|---------|---------|---------|---------|----------|-----|-------|
| 200600075 | F   |        | OB    | 136     | 232     | 158     | 154     | 178     | 137     | 20055049 | M   | BB    |
|           |     |        |       | 115     | 178     | 151     | 144     | 168     | 193     |          |     |       |
| 200601172 | F   | 57     | OB    |         |         | 158     |         |         | 178     | 137      |     |       |
| 200601173 | F   | 44     | OB    |         |         | 178     |         |         | 178     | 137      |     |       |
| 200601174 | F   | 44     | OB    | 136     | 232     | 158     | 144     | 168     | 193     |          |     |       |
| 200601175 | F   | 41     | OB    | 136     | 232     | 158     | 154     | 178     | 137     |          |     |       |
| 200601176 | F   | 40     | OB    | 136     | 232     | 158     | 144     | 168     | 193     |          |     |       |
| 200601177 | F   | 42     | BB    | 136     | 232     | 158     | 144     | 168     | 193     |          |     |       |
| 200601178 | F   | 41     | BB    | 115     | 178     |         | 144     | 168     |         |          |     |       |
| 200601179 | F   | 41     | BB    | 136     | 232     | 158     | 144     | 168     | 137     |          |     |       |
| 200601180 | F   | 46     | BB    | 136     | 232     | 158     | 154     | 178     | 137     |          |     |       |
| 200601181 | F   | 48     | BB    | 115     | 178     | 151     | 154     | 178     | 137     |          |     |       |
| 200601182 | F   | 45     | BB    | 115     | 178     | 151     | 154     | 178     | 137     |          |     |       |

**UNH2095**

|     |     |     |
|-----|-----|-----|
| 136 | M 0 | M 0 |
|     | F 2 | F 4 |
| 115 | M 0 | M 0 |
|     | F 2 | F 1 |

**UNH2086**

|     |     |     |
|-----|-----|-----|
| 232 | M 0 | M 0 |
|     | F 2 | F 4 |
| 178 | M 0 | M 0 |
|     | F 3 | F 1 |

**UNH2031**

|     |     |     |
|-----|-----|-----|
| 158 | M 0 | M 0 |
|     | F 4 | F 3 |
| 151 | M 0 | M 0 |
|     | F 3 | F 0 |

Fisher's Exact using genotypes of all individuals

X<sup>2</sup>: 0  
P: 1

X<sup>2</sup>: 0  
P: 1

X<sup>2</sup>: 0  
P: 1

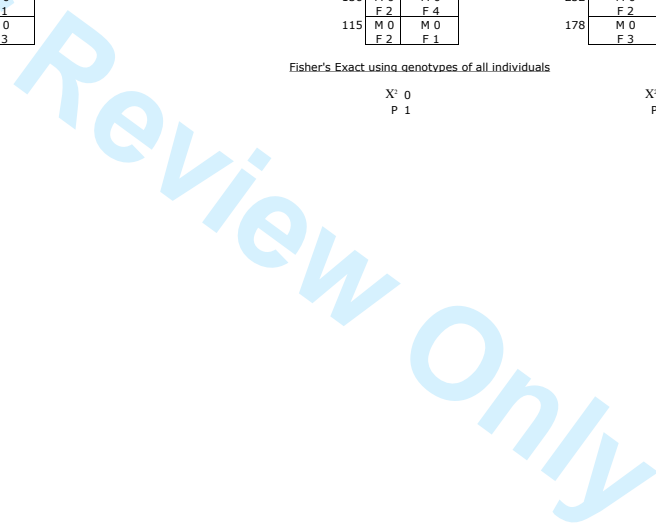

S13.9: *Metriaclima pyrsonotus* RMPy012 genotypes for LG 5 and LG 7.

**M. pyrsonotus**  
**RMPy012**

Ratio M:F  
OM : 19F  
total  
19 ind

**LG 5**

| Fish      | Sex | Length | Color | UNH2139 | cski | Gm264a | UNH2139 | cski | Gm264a | Fish     | Sex |
|-----------|-----|--------|-------|---------|------|--------|---------|------|--------|----------|-----|
| 200600076 | F   |        | OB    | 202     | 215  | 215    | 196     | 220  | 236    | 20055049 | M   |
|           |     |        |       | 202     | 225  | 195    | 202     | 228  | 219    |          |     |
| 200700545 | F   | 57     | OB    | 202     | 215  | 215    | 196     | 228  | 219    |          |     |
| 200700546 | F   | 60     | OB    | 202     | 215  | 215    | 202     | 228  | 219    |          |     |
| 200700547 | F   | 52     | OB    | 202     | 215  | 215    | 202     | 228  | 219    |          |     |
| 200700548 | F   | 53     | OB    | 202     | 215  | 215    | 202     | 228  | 219    |          |     |
| 200700549 | F   | 53     | OB    | 202     | 215  | 215    | 196     | 220  | 236    |          |     |
| 200700550 | F   | 54     | OB    | 202     | 215  | 215    | 196     | 220  | 236    |          |     |
| 200700551 | F   | 48     | OB    | 202     | 215  | 215    | 196     | 220  |        |          |     |
| 200700552 | F   | 53     | OB    | 202     | 215  | 215    | 202     | 228  | 219    |          |     |
| 200700558 | F   | 47     | OB    | 202     | 215  | 215    | 196     | 220  | 236    |          |     |
| 200700559 | F   | 56     | OB    | 202     | 215  |        | 196     | 220  |        |          |     |
| 200700560 | F   | 53     | OB    | 202     | 215  | 215    | 202     | 228  | 219    |          |     |
| 200700553 | F   | 51     | BB    | 202     | 225  | 195    | 202     | 228  | 219    |          |     |
| 200700554 | F   | 52     | BB    | 202     | 225  | 195    | 202     | 228  | 236    |          |     |
| 200700555 | F   | 54     | BB    | 202     | 225  | 195    | 202     | 228  | 219    |          |     |
| 200700556 | F   | 47     | BB    | 202     | 225  | 195    | 196     | 220  | 219    |          |     |
| 200700557 | F   | 50     | BB    | 202     | 225  | 195    | 196     | 220  | 236    |          |     |
| 200700561 | F   | 54     | BB    | 202     | 225  | 195    | 196     | 220  | 236    |          |     |
| 200700562 | F   | 52     | BB    | 202     | 225  | 195    | 196     | 220  | 236    |          |     |
| 200700563 | F   | 51     | BB    | 202     | 225  | 195    | 202     | 228  | 236    |          |     |

**UNH2139**

|      |     |
|------|-----|
| 196  | 202 |
| M 0  | M 0 |
| F 10 | F 9 |

**cski**

|     |     |
|-----|-----|
| 220 | 229 |
| M 0 | M 0 |
| F 5 | F 6 |
| M 0 | M 0 |
| F 4 | F 4 |

**Gm264a**

|     |     |
|-----|-----|
| 236 | 219 |
| M 0 | M 0 |
| F 3 | F 6 |
| M 0 | M 0 |
| F 5 | F 3 |

Fisher's Exact using genotypes of all individuals

X<sup>2</sup> 0  
P 1

X<sup>2</sup> 0  
P 1

X<sup>2</sup> 0  
P 1

**LG 7**

| Fish      | Sex | Length | Color | UNH2095 | UNH2086 | UNH2031 | UNH2095 | UNH2086 | UNH2031 | Fish     | Sex |
|-----------|-----|--------|-------|---------|---------|---------|---------|---------|---------|----------|-----|
|           |     |        |       | 155     | 230     | 156     | 154     | 178     | 137     | 20055049 | M   |
|           |     |        |       | 126     | 167     | 185     | 144     | 168     | 193     |          |     |
| 200700545 | F   | 57     | OB    | 155     | 230     | 156     | 154     | 178     | 137     |          |     |
| 200700546 | F   | 60     | OB    | 155     | 230     | 156     | 154     | 178     | 137     |          |     |
| 200700547 | F   | 52     | OB    | 126     | 167     | 185     | 154     | 178     | 137     |          |     |
| 200700548 | F   | 53     | OB    | 155     | 230     | 156     | 154     | 178     | 137     |          |     |
| 200700549 | F   | 53     | OB    | 155     | 230     | 156     | 144     | 168     | 193     |          |     |
| 200700550 | F   | 54     | OB    | 155     | 230     | 156     | 144     | 168     | 193     |          |     |
| 200700551 | F   | 48     | OB    | 126     | 167     | 185     |         | 178     |         |          |     |
| 200700552 | F   | 53     | OB    |         |         |         |         |         |         |          |     |
| 200700558 | F   | 47     | OB    |         | 167     | 185     |         |         |         | 168      | 193 |
| 200700559 | F   | 56     | OB    |         | 230     | 156     |         |         |         | 168      | 193 |
| 200700560 | F   | 53     | OB    | 126     | 167     |         | 154     | 178     |         |          |     |
| 200700553 | F   | 51     | BB    |         |         |         |         |         |         |          |     |
| 200700554 | F   | 52     | BB    |         | 230     | 156     |         |         |         | 178      | 137 |
| 200700555 | F   | 54     | BB    | 126     | 167     |         | 144     | 168     |         |          |     |
| 200700556 | F   | 47     | BB    | 126     | 167     | 185     | 154     | 178     | 137     |          |     |
| 200700557 | F   | 50     | BB    |         | 230     | 156     |         |         |         | 168      | 193 |
| 200700561 | F   | 54     | BB    | 155     | 230     | 156     | 144     | 168     | 193     |          |     |
| 200700562 | F   | 52     | BB    | 126     | 167     |         | 154     | 178     | 137     |          |     |
| 200700563 | F   | 51     | BB    | 155     | 230     | 156     | 144     | 168     | 193     |          |     |

**UNH2095**

|     |     |
|-----|-----|
| 154 | 144 |
| M 0 | M 0 |
| F 3 | F 4 |
| M 0 | M 0 |
| F 4 | F 1 |

**UNH2086**

|     |     |
|-----|-----|
| 178 | 168 |
| M 0 | M 0 |
| F 4 | F 6 |
| M 0 | M 0 |
| F 5 | F 2 |

**UNH2031**

|     |     |
|-----|-----|
| 137 | 193 |
| M 0 | M 0 |
| F 4 | F 6 |
| M 0 | M 0 |
| F 2 | F 1 |

Fisher's Exact using genotypes of all individuals

X<sup>2</sup> 0  
P 1

X<sup>2</sup> 0  
P 1

X<sup>2</sup> 0  
P 1

1  
2  
3  
4  
5  
6  
7  
8  
9  
10  
11  
12  
13  
14  
15  
16  
17  
18  
19  
20  
21  
22  
23  
24  
25  
26  
27  
28  
29  
30  
31  
32  
33  
34  
35  
36  
37  
38  
39  
40  
41  
42  
43  
44  
45  
46  
47  
48  
49

1  
2  
3  
4  
5  
6  
7  
8  
9  
10  
11  
12  
13  
14  
15  
16  
17  
18  
19  
20  
21  
22  
23  
24  
25  
26  
27  
28  
29  
30  
31  
32  
33  
34  
35  
36  
37  
38  
39  
40  
41  
42  
43  
44  
45  
46  
47  
48  
49

S13.10: *Metriaclima pyrsonotus* RMPy013 genotypes for LG 5 and LG 7.

***M. pyrsonotus***  
**RMPy013** Ratio M:F  
OM : 16F total  
16 ind

**LG 5**

| Fish      | Sex | Length | Color | UNH2139 | cski | GM264A | UNH2139 | cski | GM264A | Fish     | Sex | Color |
|-----------|-----|--------|-------|---------|------|--------|---------|------|--------|----------|-----|-------|
| 200600077 | F   |        | OB    | 194     | 217  |        | 196     | 221  | 219    | 20055049 | M   | BB    |
|           |     |        |       | 194     | 213  |        | 202     | 229  | 236    |          |     |       |
| 200600629 | F   | 37     | OB    | 194     | 217  |        | 202     | 229  |        |          |     |       |
| 200600630 | F   | 40     | OB    |         | 217  |        | 202     | 221  |        |          |     |       |
| 200600635 | F   | 47     | OB    | 194     | 217  |        | 202     | 221  |        |          |     |       |
| 200600638 | F   | 45     | OB    | 194     | 217  |        | 202     | 229  |        |          |     |       |
| 200600639 | F   | 30     | OB    | 194     | 217  |        | 202     | 221  |        |          |     |       |
| 200600641 | F   | 45     | OB    | 194     | 217  |        | 196     | 221  |        |          |     |       |
| 200600644 | F   | 42     | OB    | 194     |      |        | 196     | 221  |        |          |     |       |
| 200600631 | F   | 38     | BB    | 194     | 213  |        |         |      |        |          |     |       |
| 200600632 | F   | 42     | BB    |         |      |        | 211     | 221  |        |          |     |       |
| 200600633 | F   | 43     | BB    | 211     | 213  |        | 219     | 229  |        |          |     |       |
| 200600634 | F   | 44     | BB    | 211     | 213  |        | 196     | 221  |        |          |     |       |
| 200600636 | F   | 47     | BB    | 194     | 213  |        | 196     | 221  |        |          |     |       |
| 200600637 | F   | 45     | BB    | 194     |      |        | 202     | 229  |        |          |     |       |
| 200600640 | F   | 43     | BB    | 194     | 213  |        | 202     | 229  |        |          |     |       |
| 200600642 | F   | 45     | BB    | 194     |      |        | 202     | 229  |        |          |     |       |
| 200600643 | F   | 42     | BB    | 194     | 213  |        | 202     | 229  |        |          |     |       |

| UNH2139 |     |     | cski |     |     |
|---------|-----|-----|------|-----|-----|
| 194     | 196 | 202 | 217  | 221 | 229 |
| M 0     | M 0 | M 0 | M 0  | M 0 | M 0 |
| F 4     | F 7 |     | F 4  | F 2 |     |
|         |     |     | M 0  | M 0 |     |
|         |     |     | F 3  | F 3 |     |

Fisher's Exact using genotypes of all individuals

|                  |                  |
|------------------|------------------|
| X <sup>2</sup> 0 | X <sup>2</sup> 0 |
| P 1              | P 1              |

**LG 7**

| Fish      | Sex | Length | Color | UNH2095 | UNH2086 | UNH2031 | UNH2095 | UNH2086 | UNH2031 | Fish     | Sex | Color |
|-----------|-----|--------|-------|---------|---------|---------|---------|---------|---------|----------|-----|-------|
| 200600077 | F   |        | OB    | 146     | 137     | 168     | 154     | 176     | 137     | 20055049 | M   | BB    |
|           |     |        |       | 154     | 230     | 158     | 144     | 165     | 193     |          |     |       |
| 200600629 | F   | 37     | OB    | 146     | 137     | 168     | 154     | 176     | 137     |          |     |       |
| 200600630 | F   | 40     | OB    | 146     | 137     | 168     | 144     | 165     | 193     |          |     |       |
| 200600635 | F   | 47     | OB    | 146     | 137     | 168     | 154     | 176     | 137     |          |     |       |
| 200600638 | F   | 45     | OB    | 154     |         | 158     | 154     |         | 137     |          |     |       |
| 200600639 | F   | 30     | OB    | 146     | 137     | 168     | 154     | 176     | 137     |          |     |       |
| 200600641 | F   | 45     | OB    | 154     | 230     | 158     | 154     | 176     | 137     |          |     |       |
| 200600644 | F   | 42     | OB    | 146     | 137     | 168     | 154     | 176     | 137     |          |     |       |
| 200600631 | F   | 38     | BB    | 146     | 137     | 168     |         |         | 193     |          |     |       |
| 200600632 | F   | 42     | BB    |         |         | 168     |         |         |         |          |     |       |
| 200600633 | F   | 43     | BB    | 146     | 137     | 168     | 144     | 165     | 193     |          |     |       |
| 200600634 | F   | 44     | BB    | 146     | 137     | 158     | 154     | 176     | 137     |          |     |       |
| 200600636 | F   | 47     | BB    | 146     | 137     | 168     | 154     | 176     | 137     |          |     |       |
| 200600637 | F   | 45     | BB    | 146     | 230     | 158     | 154     | 165     | 193     |          |     |       |
| 200600640 | F   | 43     | BB    | 146     | 137     | 168     | 144     | 165     | 193     |          |     |       |
| 200600642 | F   | 45     | BB    | 146     | 137     | 168     | 154     | 165     | 193     |          |     |       |
| 200600643 | F   | 42     | BB    | 146     | 137     | 168     | 154     | 176     | 137     |          |     |       |

| UNH2095 |     |     | UNH2086 |     |     | UNH2031 |     |     |
|---------|-----|-----|---------|-----|-----|---------|-----|-----|
| 146     | 154 | 144 | 137     | 176 | 165 | 168     | 137 | 193 |
| M 0     | M 0 | M 0 | M 0     | M 0 | M 0 | M 0     | M 0 | M 0 |
| F 9     | F 3 |     | F 7     | F 4 |     | F 6     | F 6 |     |
| M 0     | M 0 |     | M 0     | M 0 |     | M 0     | M 0 |     |
| F 2     | F 0 |     | F 1     | F 1 |     | F 3     | F 1 |     |

Fisher's Exact using genotypes of all individuals

|                  |                  |                  |
|------------------|------------------|------------------|
| X <sup>2</sup> 0 | X <sup>2</sup> 0 | X <sup>2</sup> 0 |
| P 1              | P 1              | P 1              |

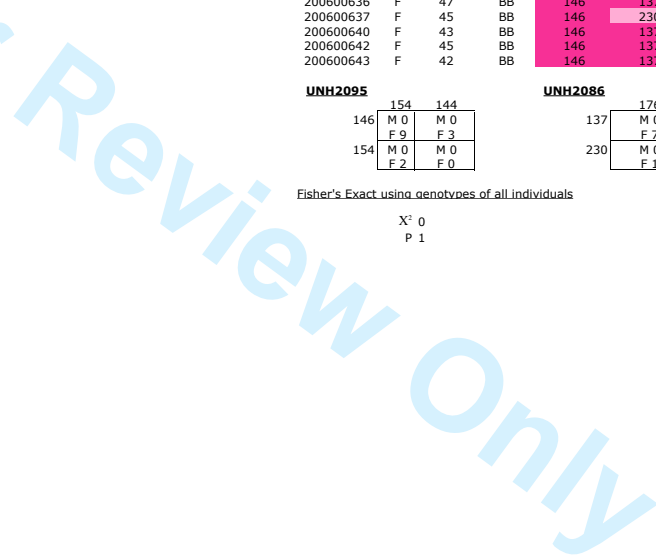

S13.11: *Metriaclima pyrrsonotus* family Rmpy018 genotypes for LG 5 and LG 7.

| <b>M. pyrrsonotus</b><br><b>Rmpy018</b> |     |        |       |         |      |        |         |      |        | Ratio M:F<br>9M : 20F |     |        | total<br>29 ind |         |         |             |         |         |         |          |     |       |  |
|-----------------------------------------|-----|--------|-------|---------|------|--------|---------|------|--------|-----------------------|-----|--------|-----------------|---------|---------|-------------|---------|---------|---------|----------|-----|-------|--|
|                                         |     |        |       |         |      |        |         |      |        | <b>LG 5</b>           |     |        |                 |         |         | <b>LG 7</b> |         |         |         |          |     |       |  |
| Fish                                    | Sex | Length | Color | UNH2139 | cski | Gm264a | UNH2139 | cski | Gm264a | Fish                  | Sex | Length | Color           | UNH2095 | UNH2086 | UNH2031     | UNH2095 | UNH2086 | UNH2031 | Fish     | Sex | Color |  |
| 200600342                               | F   |        | OB    | 202     | 215  | 215    | 196     | 220  | 236    | 20055049              | M   |        | BB              | 155     | 156     | 156         | 154     | 178     | 137     | 20055049 | M   | BB    |  |
|                                         |     |        |       | 202     | 223  | 195    | 202     | 228  | 219    |                       |     |        |                 | 126     | 165     | 185         | 144     | 168     | 193     |          |     |       |  |
| 200700578                               | F   | 46     | OB    | 202     | 215  | 215    | 202     | 228  | 219    | 200700578             | F   | 46     | OB              | 126     | 165     | 185         | 154     | 178     | 137     |          |     |       |  |
| 200700579                               | F   | 46     | OB    | 202     | 215  | 215    | 202     | 228  | 236    | 200700579             | F   | 46     | OB              | 165     | 185     |             | 168     | 193     |         |          |     |       |  |
| 200700580                               | F   | 45     | OB    | 202     | 215  | 215    | 202     | 220  | 219    | 200700580             | F   | 45     | OB              | 165     | 185     | 185         | 154     | 168     | 193     |          |     |       |  |
| 200700581                               | F   | 43     | OB    | 202     | 215  | 215    | 202     | 228  | 219    | 200700581             | F   | 43     | OB              | 155     | 165     | 185         | 154     | 178     | 137     |          |     |       |  |
| 200700582                               | F   | 47     | OB    | 202     | 215  |        | 202     | 228  |        | 200700582             | F   | 47     | OB              |         |         |             |         |         |         |          |     |       |  |
| 200700584                               | F   | 45     | OB    | 202     | 215  | 215    | 196     | 220  | 236    | 200700584             | F   | 45     | OB              | 155     | 156     | 156         | 144     | 168     | 193     |          |     |       |  |
| 200700585                               | F   | 52     | OB    | 202     | 215  | 215    | 196     | 220  | 219    | 200700585             | F   | 52     | OB              | 155     | 156     | 156         | 144     | 168     | 193     |          |     |       |  |
| 200700586                               | F   | 45     | OB    | 202     | 215  | 215    | 202     | 228  | 236    | 200700586             | F   | 45     | OB              | 126     | 165     | 185         | 154     | 178     | 137     |          |     |       |  |
| 200700587                               | F   | 49     | OB    | 202     | 215  | 215    | 202     | 228  | 219    | 200700587             | F   | 49     | OB              | 165     | 185     |             | 168     | 193     |         |          |     |       |  |
| 200700588                               | F   | 47     | OB    | 202     | 215  | 215    | 196     | 220  | 236    | 200700588             | F   | 47     | OB              |         | 156     | 156         | 178     | 137     |         |          |     |       |  |
| 200700589                               | F   | 46     | OB    | 202     | 215  | 215    | 202     | 228  | 219    | 200700589             | F   | 46     | OB              | 155     | 156     | 156         | 154     | 178     | 137     |          |     |       |  |
| 200700590                               | F   | 45     | OB    | 202     | 223  | 215    | 196     | 228  | 236    | 200700590             | F   | 45     | OB              | 155     | 156     | 156         | 154     | 178     | 137     |          |     |       |  |
| 200700591                               | F   | 50     | OB    | 202     | 215  | 215    | 196     | 220  | 236    | 200700591             | F   | 50     | OB              | 126     | 165     | 185         | 154     | 178     | 137     |          |     |       |  |
| 200700592                               | F   | 45     | OB    | 202     | 215  | 195    | 202     | 220  | 219    | 200700592             | F   | 45     | OB              | 155     | 156     | 156         | 154     | 178     | 137     |          |     |       |  |
| 200700593                               | F   | 42     | OB    | 202     | 215  | 195    | 196     | 220  | 236    | 200700593             | F   | 42     | OB              | 126     | 165     | 185         | 144     | 168     | 193     |          |     |       |  |
| 200700583                               | F   | 45     | BB    | 202     | 215  |        | 196     | 228  |        | 200700583             | F   | 45     | BB              |         |         |             | 154     | 178     | 137     |          |     |       |  |
| 200700602                               | F   | 50     | BB    | 202     | 223  | 195    | 196     | 220  | 236    | 200700602             | F   | 50     | BB              | 126     | 165     | 185         | 144     | 168     | 193     |          |     |       |  |
| 200700603                               | F   | 48     | BB    | 202     | 223  | 195    | 202     | 228  | 219    | 200700603             | F   | 48     | BB              | 126     | 165     | 185         | 144     | 168     | 193     |          |     |       |  |
| 200700604                               | F   | 47     | BB    | 202     | 223  | 195    | 202     | 228  | 219    | 200700604             | F   | 47     | BB              | 155     | 156     | 156         | 144     | 168     | 193     |          |     |       |  |
| 200700605                               | F   | 51     | BB    | 202     | 223  | 195    | 202     | 228  | 219    | 200700605             | F   | 51     | BB              | 155     | 156     | 156         | 144     | 168     | 193     |          |     |       |  |
| 200700594                               | M   | 52     | BB    | 202     | 223  | 195    | 196     | 220  | 236    | 200700594             | M   | 52     | BB              | 155     | 156     | 156         | 154     | 178     | 137     |          |     |       |  |
| 200700595                               | M   | 59     | BB    | 202     | 223  | 195    | 202     | 228  | 219    | 200700595             | M   | 59     | BB              | 126     | 165     |             | 154     | 178     | 137     |          |     |       |  |
| 200700596                               | M   | 58     | BB    | 202     | 223  | 195    | 196     | 220  | 236    | 200700596             | M   | 58     | BB              |         | 156     | 156         | 154     | 178     | 137     |          |     |       |  |
| 200700597                               | M   | 56     | BB    | 202     | 223  | 195    | 196     | 220  | 219    | 200700597             | M   | 56     | BB              | 155     | 156     | 156         | 154     | 178     | 137     |          |     |       |  |
| 200700598                               | M   | 55     | BB    | 202     | 223  | 195    | 202     | 228  | 219    | 200700598             | M   | 55     | BB              |         | 156     | 156         | 178     | 137     |         |          |     |       |  |
| 200700599                               | M   | 56     | BB    | 202     | 223  | 195    | 196     | 220  | 236    | 200700599             | M   | 56     | BB              | 126     | 165     | 185         | 154     | 178     | 137     |          |     |       |  |
| 200700600                               | M   | 53     | BB    | 202     | 223  | 195    | 202     | 228  | 219    | 200700600             | M   | 53     | BB              | 155     | 156     | 156         | 154     | 178     | 137     |          |     |       |  |
| 200700601                               | M   | 53     | BB    | 202     | 223  | 195    | 202     | 228  | 219    | 200700601             | M   | 53     | BB              | 126     | 165     | 185         | 154     | 178     | 137     |          |     |       |  |
| 200700606                               | M   | 49     | BB    | 202     | 223  | 195    | 196     | 220  | 236    | 200700606             | M   | 49     | BB              |         | 165     | 185         | 178     | 137     |         |          |     |       |  |

| <b>UNH2139</b> |      |     | <b>cski</b> |     | <b>Gm264a</b> |     |     |     |
|----------------|------|-----|-------------|-----|---------------|-----|-----|-----|
| 202            | 196  | 202 | 215         | 220 | 228           | 215 | 236 | 219 |
| M 5            | M 3  |     | M 0         | M 0 |               | M 0 | M 0 |     |
| F 8            | F 11 |     | F 8         | F 5 |               | F 6 | F 6 |     |
|                |      |     | 223         | M 5 | M 4           | 195 | M 4 | M 5 |
|                |      |     |             | F 1 | F 4           |     | F 2 | F 4 |

Fisher's Exact using genotypes of all individuals

|                      |                     |                   |
|----------------------|---------------------|-------------------|
| X <sup>2</sup> 0.938 | X <sup>2</sup> 14.2 | X <sup>2</sup> 11 |
| P 0.333              | P 0.003             | P 0.012           |

Fisher's Exact using maternal and paternal alleles

|                               |                       |                       |
|-------------------------------|-----------------------|-----------------------|
| Maternal X <sup>2</sup> NI    | X <sup>2</sup> 14.000 | X <sup>2</sup> 10.800 |
| P Homo                        | P <.0001              | P 0.001               |
| Paternal X <sup>2</sup> 0.938 | X <sup>2</sup> 0.277  | X <sup>2</sup> 0.016  |
| P 0.333                       | P 0.599               | P 0.899               |

| <b>UNH2095</b> |     |     | <b>UNH2086</b> |     | <b>UNH2031</b> |     |     |     |
|----------------|-----|-----|----------------|-----|----------------|-----|-----|-----|
| 155            | 154 | 144 | 156            | 178 | 168            | 156 | 137 | 193 |
| M 3            | M 0 |     | M 5            | M 0 |                | M 5 | M 0 |     |
| F 0            | F 2 |     | F 4            | F 5 |                | F 4 | F 4 |     |
| 126            | M 3 | M 0 | 165            | M 4 | M 0            | 185 | M 3 | M 0 |
|                | F 4 | F 2 |                | F 5 | F 4            |     | F 5 | F 5 |

Fisher's Exact using genotypes of all individuals

|                     |                  |                     |
|---------------------|------------------|---------------------|
| X <sup>2</sup> 4.29 | X <sup>2</sup> 7 | X <sup>2</sup> 6.77 |
| P 0.232             | P 0.072          | P 0.08              |

Fisher's Exact using maternal and paternal alleles

|                               |                      |                      |
|-------------------------------|----------------------|----------------------|
| Maternal X <sup>2</sup> 0.087 | X <sup>2</sup> 0.297 | X <sup>2</sup> 0.520 |
| P 0.769                       | P 0.586              | P 0.471              |
| Paternal X <sup>2</sup> 3.670 | X <sup>2</sup> 6.750 | X <sup>2</sup> 6.750 |
| P 0.053                       | P 0.009              | P 0.009              |

| <b>UNH2095</b> |     |     | <b>UNH2086</b> |     | <b>UNH2031</b> |     |     |     |
|----------------|-----|-----|----------------|-----|----------------|-----|-----|-----|
| 155            | 154 | 144 | 156            | 178 | 168            | 156 | 137 | 193 |
| M 3            | M 0 |     | M 5            | M 0 |                | M 5 | M 0 |     |
| F 0            | F 2 |     | F 0            | F 2 |                | F 0 | F 2 |     |
| 126            | M 3 | M 0 | 165            | M 4 | M 0            | 185 | M 3 | M 0 |
|                | F 1 | F 1 |                | F 1 | F 1            |     | F 1 | F 1 |

Fisher's Exact using genotypes of BB females and all males

|                     |                     |                     |
|---------------------|---------------------|---------------------|
| X <sup>2</sup> 6.88 | X <sup>2</sup> 9.24 | X <sup>2</sup> 8.62 |
| P 0.076             | P 0.026             | P 0.035             |

Fisher's Exact using maternal and paternal alleles

|                               |                      |                      |
|-------------------------------|----------------------|----------------------|
| Maternal X <sup>2</sup> 0     | X <sup>2</sup> 0.034 | X <sup>2</sup> 0.171 |
| P 1                           | P 0.853              | P 0.679              |
| Paternal X <sup>2</sup> 0.643 | X <sup>2</sup> 8.780 | X <sup>2</sup> 8.780 |
| P 0.011                       | P 0.003              | P 0.003              |

S13.12: *Metriacalma pyronotus* RMpy021 genotypes for LG 5 and LG 7.

| <i>M. pyronotus</i> RMpy021 |     |        |       |         |      |        |         |      |        |          |     | Ratio M:F<br>9M : 35F |         |         |         |         |         |         |          |     |       |  |  | total<br>44 ind |
|-----------------------------|-----|--------|-------|---------|------|--------|---------|------|--------|----------|-----|-----------------------|---------|---------|---------|---------|---------|---------|----------|-----|-------|--|--|-----------------|
| LG 5                        |     |        |       |         |      |        |         |      |        |          |     | LG 7                  |         |         |         |         |         |         |          |     |       |  |  |                 |
| Fish                        | Sex | Length | Color | UNH2139 | cski | GM264A | UNH2139 | cski | GM264A | Fish     | Sex | Color                 | UNH2095 | UNH2086 | UNH2031 | UNH2095 | UNH2086 | UNH2031 | Fish     | Sex | Color |  |  |                 |
| 06-843                      | F   |        | 0     | 218     | 215  | 221    | 196     | 220  | 236    | 20055049 | M   | BB                    | 115     | 176     | 152     | 155     | 178     | 137     | 20055049 | M   | BB    |  |  |                 |
|                             |     |        |       | 224     | 219  | 192    | 202     | 228  | 219    |          |     |                       | 136     | 232     | 158     | 145     | 168     | 193     |          |     |       |  |  |                 |

  

| UNH2139 |     |     |  |  |  | cski |     |      | GM264A |     |     | UNH2095 |     |     |     |     |     | UNH2086 |     |      | UNH2031 |     |     |      |
|---------|-----|-----|--|--|--|------|-----|------|--------|-----|-----|---------|-----|-----|-----|-----|-----|---------|-----|------|---------|-----|-----|------|
| 218     | 196 | 202 |  |  |  | 221  | 220 | 236  | 221    | 196 | 220 | 236     | 115 | 176 | 152 | 155 | 178 | 137     | 152 | 137  | 193     |     |     |      |
| M 0     | M 0 | F 7 |  |  |  | F 6  | F 6 | F 15 | F 14   | M 4 | M 0 | F 6     | M 4 | M 0 | F 8 | M 4 | M 0 | F 9     | M 4 | F 10 | M 0     | F 6 | M 0 | F 14 |
| 224     |     |     |  |  |  | 192  |     |      |        | 136 | 232 | 158     | 115 | 176 | 152 | 145 | 168 | 193     | 136 | 232  | 158     | 145 | 168 | 193  |
| M 5     | M 4 | F 5 |  |  |  | M 5  | M 5 | M 4  | F 8    | M 2 | M 3 | F 10    | M 2 | M 3 | F 8 | M 2 | M 3 | F 7     | M 2 | M 3  | F 8     | M 2 | M 3 | F 5  |

  

|                                                    |                      |         |                     |                       |         |                                                    |                       |         |                     |          |                      |                                                    |        |                      |                    |         |                      |         |  |
|----------------------------------------------------|----------------------|---------|---------------------|-----------------------|---------|----------------------------------------------------|-----------------------|---------|---------------------|----------|----------------------|----------------------------------------------------|--------|----------------------|--------------------|---------|----------------------|---------|--|
| Fisher's Exact using genotypes of all individuals  |                      |         |                     |                       |         | Fisher's Exact using genotypes of all individuals  |                       |         |                     |          |                      | Fisher's Exact using genotypes of all individuals  |        |                      |                    |         |                      |         |  |
| X <sup>2</sup> 10.8                                | P 0.013              |         | X <sup>2</sup> 12.2 | P 0.007               |         | X <sup>2</sup> 11.8                                | P 0.008               |         | X <sup>2</sup> 5.13 | P 0.163  |                      | X <sup>2</sup> 5.32                                | P 0.15 |                      | X <sup>2</sup> 5.9 | P 0.117 |                      |         |  |
| Fisher's Exact using maternal and paternal alleles |                      |         |                     |                       |         | Fisher's Exact using maternal and paternal alleles |                       |         |                     |          |                      | Fisher's Exact using maternal and paternal alleles |        |                      |                    |         |                      |         |  |
| Maternal                                           | X <sup>2</sup> 9.960 | P 0.002 |                     | X <sup>2</sup> 11.300 | P 0.001 |                                                    | X <sup>2</sup> 10.900 | P 0.001 |                     | Maternal | X <sup>2</sup> 0.289 | P 0.591                                            |        | X <sup>2</sup> 0.091 | P 0.764            |         | X <sup>2</sup> 1.370 | P 0.242 |  |
| Paternal                                           | X <sup>2</sup> 0.277 | P 0.599 |                     | X <sup>2</sup> 0.966  | P 0.326 |                                                    | X <sup>2</sup> 1.980  | P 0.160 |                     | Paternal | X <sup>2</sup> 0.424 | P 0.515                                            |        | X <sup>2</sup> 0.618 | P 0.432            |         | X <sup>2</sup> 1.260 | P 0.262 |  |

  

| UNH2095 |     |     | UNH2086 |     |      | UNH2031 |     |      |
|---------|-----|-----|---------|-----|------|---------|-----|------|
| 115     | 155 | 145 | 176     | 178 | 168  | 152     | 137 | 193  |
| M 4     | M 4 | M 0 | M 4     | M 4 | M 0  | M 4     | M 0 | M 0  |
| F 6     | F 6 | F 3 | F 6     | F 6 | F 10 | F 8     | F 9 | F 14 |
| 136     | M 2 | M 3 | 232     | M 1 | M 3  | 158     | M 2 | M 3  |
| F 10    | F 3 | F 5 | F 8     | F 3 | F 1  | F 7     | F 3 | F 5  |

  

|                                                            |                       |         |                     |                      |         |                     |                      |         |  |
|------------------------------------------------------------|-----------------------|---------|---------------------|----------------------|---------|---------------------|----------------------|---------|--|
| Fisher's Exact using genotypes of BB females and all males |                       |         |                     |                      |         |                     |                      |         |  |
| X <sup>2</sup> 4.01                                        | P 0.261               |         | X <sup>2</sup> 3.75 | P 0.29               |         | X <sup>2</sup> 4.01 | P 0.261              |         |  |
| Fisher's Exact using maternal and paternal alleles         |                       |         |                     |                      |         |                     |                      |         |  |
| Maternal                                                   | X <sup>2</sup> 1.350  | P 0.245 |                     | X <sup>2</sup> 0.556 | P 0.456 |                     | X <sup>2</sup> 1.350 | P 0.245 |  |
| Paternal                                                   | X <sup>2</sup> 0.0161 | P 0.899 |                     | X <sup>2</sup> 0.357 | P 0.550 |                     | X <sup>2</sup> 0.016 | P 0.899 |  |

1  
2  
3  
4  
5  
6  
7  
8  
9  
10  
11  
12  
13  
14  
15  
16  
17  
18  
19  
20  
21  
22  
23  
24  
25  
26  
27  
28  
29  
30  
31  
32  
33  
34  
35  
36  
37  
38  
39  
40  
41  
42  
43  
44  
45  
46  
47  
48  
49

S14.1: *Metriclimba saulosi* family A009 genotypes for LG 5 and LG 7.

**M. saulosi** Ratio M:F total  
Mesa-A009 40M : 3F 43 ind

|           |      |        |                        | LG 5    |      |        |         |      |        |        | LG 7 |        |                        |         |         |         |         |         |         |        |      |    |                        |
|-----------|------|--------|------------------------|---------|------|--------|---------|------|--------|--------|------|--------|------------------------|---------|---------|---------|---------|---------|---------|--------|------|----|------------------------|
| Fish      | Sex  | Length | Color                  | UNH2139 | cski | GM264A | UNH2139 | cski | GM264A | Fish   | Sex  | length | Color                  | UNH2095 | UNH2086 | UNH2031 | UNH2095 | UNH2086 | UNH2031 | Fish   | Sex  |    |                        |
| 20040014L | F    |        |                        | 219     | 216  | 230    | 225     | 216  | 237    | No DNA | M    |        |                        | 133     | 174     | 179     | 133     | 174     | 179     | No DNA | M    |    |                        |
|           |      |        |                        | 212     | 216  | 225    | 182     | 216  | 230    |        |      |        |                        | 115     | 201     | 179     | 115     | 170     | 179     |        |      |    |                        |
| 05L095    | F    | 62     | yellow barred          | 212     | 216  | 225    | 182     | 216  | 237    | 05L095 | F    | 62     | yellow barred          | 133     | 174     | 179     | 133     | 174     | 179     | 05L095 | F    | 62 | yellow barred          |
| 05L096    | F    | 64     | yellow barred          | 219     | 216  | 230    | 182     | 216  | 230    | 05L096 | F    | 64     | yellow barred          | 115     | 201     | 179     | 115     | 170     | 179     | 05L096 | F    | 64 | yellow barred          |
| 05L107    | F    | 61     | yellow barred          | 219     | 216  | 230    | 182     | 216  | 237    | 05L107 | F    | 61     | yellow barred          | 133     | 174     | 179     | 133     | 170     | 179     | 05L107 | F    | 61 | yellow barred          |
| 05L001    | M    | 55     | bluebody/yellow tail   | 212     | 216  | 225    | 225     | 216  | 237    | 05L001 | M    | 55     | bluebody/yellow tail   | 115     | 201     | 179     | 133     | 170     | 179     | 05L001 | M    | 55 | bluebody/yellow tail   |
| 05L002    | M    | 58     | yellow                 | 219     | 216  | 230    | 225     | 216  | 237    | 05L002 | M    | 58     | yellow                 | 115     | 201     | 179     | 115     | 170     | 179     | 05L002 | M    | 58 | yellow                 |
| 05L004    | M    | 64     | blue bar               | 219     | 216  | 230    | 182     | 216  | 230    | 05L004 | M    | 64     | blue bar               | 115     | 201     | 179     | 133     | 170     | 179     | 05L004 | M    | 64 | blue bar               |
| 05L005    | M    | 62     | yellow                 | 212     | 216  | 225    | 225     | 216  | 237    | 05L005 | M    | 62     | yellow                 | 133     | 174     | 179     | 133     | 170     | 179     | 05L005 | M    | 62 | yellow                 |
| 05L006    | M    | 61     | yellow/black fin edges | 212     | 216  | 225    | 225     | 216  | 237    | 05L006 | M    | 61     | yellow/black fin edges | 133     | 174     | 179     | 115     | 170     | 179     | 05L006 | M    | 61 | yellow/black fin edges |
| 05L007    | M    | 61     | blue w/yellow tail     | 212     | 216  | 225    | 225     | 216  | 237    | 05L007 | M    | 61     | blue w/yellow tail     | 133     | 174     | 179     | 133     | 174     | 179     | 05L007 | M    | 61 | blue w/yellow tail     |
| 05L008    | M    | 71     | BB/yellow black tail   | 219     | 216  | 230    | 182     | 216  | 237    | 05L008 | M    | 71     | BB/yellow black tail   | 115     | 201     | 179     | 115     | 170     | 179     | 05L008 | M    | 71 | BB/yellow black tail   |
| 05L009    | M    | 69     | blue/yellow/black tail | 219     | 216  | 230    | 182     | 216  | 230    | 05L009 | M    | 69     | blue/yellow/black tail | 115     | 201     | 179     | 115     | 170     | 179     | 05L009 | M    | 69 | blue/yellow/black tail |
| 05L010    | M    | 64     | yellow/yellow tail     | 219     | 216  | 230    | 225     | 216  | 237    | 05L010 | M    | 64     | yellow/yellow tail     | 133     | 174     | 179     | 115     | 170     | 179     | 05L010 | M    | 64 | yellow/yellow tail     |
| 05L011    | M    | 66     | blue/yellow tail       | 219     | 216  | 225    | 225     | 216  | 237    | 05L011 | M    | 66     | blue/yellow tail       | 115     | 174     | 179     | 133     | 174     | 179     | 05L011 | M    | 66 | blue/yellow tail       |
| 05L012    | M    | 64     | blue/yellow tail       | 219     | 216  | 230    | 182     | 216  | 230    | 05L012 | M    | 64     | blue/yellow tail       | 133     | 174     | 179     | 133     | 174     | 179     | 05L012 | M    | 64 | blue/yellow tail       |
| 05L013    | M    | 59     | yellow                 | 219     | 216  | 230    | 182     | 216  | 237    | 05L013 | M    | 59     | yellow                 | 133     | 174     | 179     | 133     | 174     | 179     | 05L013 | M    | 59 | yellow                 |
| 05L014    | M    | 61     | yellow                 | 212     | 216  | 225    | 225     | 216  | 237    | 05L014 | M    | 61     | yellow                 | 115     | 201     | 179     | 115     | 174     | 179     | 05L014 | M    | 61 | yellow                 |
| 05L015    | M    | 62     | blue/yellow tail       | 215     | 216  | 225    | 225     | 216  | 237    | 05L015 | M    | 62     | blue/yellow tail       | 115     | 201     | 179     | 133     | 174     | 179     | 05L015 | M    | 62 | blue/yellow tail       |
| 05L016    | M    | 62     | yellow                 | 212     | 216  | 230    | 182     | 216  | 237    | 05L016 | M    | 62     | yellow                 | 115     | 201     | 179     | 115     | 174     | 179     | 05L016 | M    | 62 | yellow                 |
| 05L087    | M    | 69     | BB                     | 219     | 216  | 230    | 225     | 216  | 237    | 05L087 | M    | 69     | BB                     | 115     | 201     | 179     | 133     | 174     | 179     | 05L087 | M    | 69 | BB                     |
| 05L088    | M    | 68     | BB                     | 219     | 216  | 230    | 225     | 216  | 237    | 05L088 | M    | 68     | BB                     | 115     | 201     | 179     | 133     | 174     | 179     | 05L088 | M    | 68 | BB                     |
| 05L089    | M    | 66     | BB                     | 219     | 216  | 225    | 182     | 216  | 230    | 05L089 | M    | 66     | BB                     | 115     | 201     | 179     | 133     | 174     | 179     | 05L089 | M    | 66 | BB                     |
| 05L090    | M    | 61     | BB                     | 219     | 216  | 230    | 225     | 216  | 237    | 05L090 | M    | 61     | BB                     | 133     | 174     | 179     | 133     | 170     | 179     | 05L090 | M    | 61 | BB                     |
| 05L091    | M    | 66     | BB                     | 191     | 216  | 230    | 225     | 216  | 237    | 05L091 | M    | 66     | BB                     | 115     | 201     | 179     | 115     | 174     | 179     | 05L091 | M    | 66 | BB                     |
| 05L092    | M    | 66     | BB                     | 219     | 216  | 230    | 225     | 216  | 237    | 05L092 | M    | 66     | BB                     | 115     | 201     | 179     | 133     | 174     | 179     | 05L092 | M    | 66 | BB                     |
| 05L093    | M    | 67     | yellow/BB              | 219     | 216  | 230    | 182     | 216  | 230    | 05L093 | M    | 67     | yellow/BB              | 115     | 201     | 179     | 115     | 174     | 179     | 05L093 | M    | 67 | yellow/BB              |
| 05L094    | M    | 68     | BBish                  | 219     | 216  | 225    | 182     | 216  | 230    | 05L094 | M    | 68     | BBish                  | 133     | 174     | 179     | 133     | 174     | 179     | 05L094 | M    | 68 | BBish                  |
| 05L097    | M    | 63     | yellow barred          | 219     | 216  | 230    | 225     | 216  | 237    | 05L097 | M    | 63     | yellow barred          | 115     | 174     | 179     | 133     | 170     | 179     | 05L097 | M    | 63 | yellow barred          |
| 05L098    | M    | 63     | yellow barred          | 212     | 216  | 225    | 182     | 216  | 230    | 05L098 | M    | 63     | yellow barred          | 133     | 174     | 179     | 115     | 170     | 179     | 05L098 | M    | 63 | yellow barred          |
| 05L099    | M    | 64     | yellow barred          | 215     | 216  | 230    | 182     | 216  | 230    | 05L099 | M    | 64     | yellow barred          | 115     | 174     | 179     | 115     | 170     | 179     | 05L099 | M    | 64 | yellow barred          |
| 05L100    | M    | 57     | yellow barred          | 219     | 216  | 230    | 182     | 216  | 230    | 05L100 | M    | 57     | yellow barred          | 133     | 174     | 179     | 115     | 170     | 179     | 05L100 | M    | 57 | yellow barred          |
| 05L101    | M    | 59     | yellow                 | 212     | 216  | 225    | 182     | 216  | 230    | 05L101 | M    | 59     | yellow                 | 133     | 174     | 179     | 133     | 170     | 179     | 05L101 | M    | 59 | yellow                 |
| 05L102    | M    | 59     | yellow barred          | 219     | 216  | 225    | 182     | 216  | 230    | 05L102 | M    | 59     | yellow barred          | 115     | 201     | 179     | 115     | 174     | 179     | 05L102 | M    | 59 | yellow barred          |
| 05L104    | M    | 64     | yellow barred          | 219     | 216  | 230    | 225     | 216  | 230    | 05L104 | M    | 64     | yellow barred          | 133     | 174     | 179     | 133     | 170     | 179     | 05L104 | M    | 64 | yellow barred          |
| 05L105    | M    | 62     | yellow barred          | 219     | 216  | 230    | 225     | 216  | 237    | 05L105 | M    | 62     | yellow barred          | 133     | 174     | 179     | 133     | 174     | 179     | 05L105 | M    | 62 | yellow barred          |
| 05L106    | M    | 55     | yellow barred          | 219     | 216  | 230    | 225     | 216  | 230    | 05L106 | M    | 55     | yellow barred          | 133     | 174     | 179     | 115     | 170     | 179     | 05L106 | M    | 55 | yellow barred          |
| 05L108    | M    | 59     | yellow                 | 219     | 216  | 230    | 182     | 216  | 230    | 05L108 | M    | 59     | yellow                 | 133     | 174     | 179     | 115     | 170     | 179     | 05L108 | M    | 59 | yellow                 |
| 05L109    | M    | 62     | yellow barred          | 212     | 216  | 230    | 225     | 216  | 230    | 05L109 | M    | 62     | yellow barred          | 115     | 174     | 179     | 115     | 170     | 179     | 05L109 | M    | 62 | yellow barred          |
| 05L110    | M    | 63     | yellow barred          | 219     | 216  | 225    | 225     | 216  | 237    | 05L110 | M    | 63     | yellow barred          | 133     | 174     | 179     | 133     | 170     | 179     | 05L110 | M    | 63 | yellow barred          |
| 05L111    | M    | 63     | yellow                 | 219     | 216  | 230    | 225     | 216  | 237    | 05L111 | M    | 63     | yellow                 | 115     | 174     | 179     | 115     | 170     | 179     | 05L111 | M    | 63 | yellow                 |
| 05L112    | M    | 62     | yellow barred          | 212     | 216  | 225    | 182     | 216  | 230    | 05L112 | M    | 62     | yellow barred          | 133     | 174     | 179     | 133     | 174     | 179     | 05L112 | M    | 62 | yellow barred          |
| 05L113    | M    | 62     | yellow                 | 212     | 216  | 225    | 182     | 216  | 230    | 05L113 | M    | 62     | yellow                 | 133     | 174     | 179     | 115     | 170     | 179     | 05L113 | M    | 62 | yellow                 |
| 05L003    | ?(M) | 46     | yellow                 | 216     | 216  | 225    | 225     | 216  | 237    | 05L003 | ?(M) | 46     | yellow                 | 133     | 201     | 179     | 115     | 170     | 179     | 05L003 | ?(M) | 46 | yellow                 |
| 05L103    | ?(M) | 58     | yellow barred          | 212     | 216  | 230    | 182     | 216  | 237    | 05L103 | ?(M) | 58     | yellow barred          | 133     | 174     | 179     | 133     | 170     | 179     | 05L103 | ?(M) | 58 | yellow barred          |

**UNH2139 cski**

|      |      |     |
|------|------|-----|
| 219  | 225  | 182 |
| M 12 | M 11 |     |
| F 0  | F 2  |     |
| M 6  | M 5  |     |
| F 0  | F 1  |     |
|      | Un 1 |     |

**216**

|      |
|------|
| M 38 |
| F 3  |
| Un 2 |

**GM264A**

|      |      |     |
|------|------|-----|
| 230  | 237  | 230 |
| M 11 | M 11 |     |
| F 1  | F 1  |     |
|      | Un 1 |     |
| M 8  | M 7  |     |
| F 1  | F 0  |     |
|      | Un 1 |     |

**UNH2095**

|      |      |     |
|------|------|-----|
| 133  | 133  | 115 |
| M 11 | M 9  |     |
| F 2  | F 0  |     |
| Un 1 |      |     |
| M 16 | M 9  |     |
| F 0  | F 0  |     |
|      | Un 1 |     |

**UNH2086**

|      |      |     |
|------|------|-----|
| 174  | 174  | 170 |
| M 8  | M 11 |     |
| F 0  | F 2  |     |
|      | Un 1 |     |
| M 10 | M 2  |     |
| F 0  | F 0  |     |
|      | Un 1 |     |

**UNH2031**

|      |     |
|------|-----|
| 179  | 179 |
| 38   |     |
| F 3  |     |
| Un 2 |     |

Fisher's Exact using genotypes of all individuals

|           |         |             |
|-----------|---------|-------------|
| $X^2$ 3.1 | $X^2$ 0 | $X^2$ 0.765 |
| P 0.376   | P 1     | P 0.858     |

Fisher's Exact using maternal and paternal alleles

|          |             |          |             |
|----------|-------------|----------|-------------|
| Maternal | $X^2$ 0.001 | $X^2$ NI | $X^2$ 0.044 |
|          | P 0.972     | P Homo   | P 0.834     |
| Paternal | $X^2$ 3.090 | $X^2$ NI | $X^2$ 0.309 |
|          | P 0.079     | P Homo   | P 0.578     |

Fisher's Exact using genotypes of all individuals

|            |            |         |
|------------|------------|---------|
| $X^2$ 4.06 | $X^2$ 3.28 | $X^2$ 0 |
| P 0.131    | P 0.351    | P 1     |

Fisher's Exact using maternal and paternal alleles

|          |          |             |          |
|----------|----------|-------------|----------|
| Maternal | $X^2$ NI | $X^2$ 1.220 | $X^2$ NI |
|          | P Het    | P 0.270     | P Homo   |
| Paternal | $X^2$ NI | $X^2$ 2.550 | $X^2$ NI |
|          | P Het    | P 0.110     | P Homo   |



S15.1: *Metriaclicma zebra* family A003 genotypes for LG 5 and LG 7.

**M. zebra**  
**Meze-A003**  
 Ratio M:F  
 12M : 15F  
 1 Unknown  
 total  
 24 ind

| LG 5      |      |        |         |      |        |         |      |        | LG 7      |      |        |           |         |         |           |         |         |          |     |
|-----------|------|--------|---------|------|--------|---------|------|--------|-----------|------|--------|-----------|---------|---------|-----------|---------|---------|----------|-----|
| Fish      | Sex  | Length | UNH2139 | cski | GM264A | UNH2139 | cski | GM264A | Fish      | Sex  | Length | UNH2095   | UNH2086 | UNH2031 | UNH2095   | UNH2086 | UNH2031 | Fish     | Sex |
| Meze F22  | F    |        | 223     | 220  | 223    | 223     | 220  | 223    | Meze m11  | M    |        | No Result | 181     | 165     | No Result | 147     | 165     | Meze m11 | M   |
|           |      |        | 223     | 217  | 230    | 215     | 220  | 223    |           |      |        |           | 147     | 195     |           | 170     | 165     |          |     |
| 200600001 | F    |        | 223     | 220  | 230    | 223     | 220  | 223    | 200600001 | F    |        | NR        | 181     | 165     | NR        | 170     | 165     |          |     |
| 200600002 | F    | 56     | 223     | 220  | 230    | 223     | 220  | 223    | 200600002 | F    | 56     | NR        | 181     | 165     | NR        | 170     | 165     |          |     |
| 200600004 | F    | 54     | 223     | 220  | 223    | 223     | 220  | 223    | 200600004 | F    | 54     | NR        | 147     | 195     | NR        | 170     | 165     |          |     |
| 200600009 | F    | 62     | 211?    | 210? | 209?   | 211?    | 210? | 219?   | 200600009 | F    | 62     | NR        | 166?    | 151?    | NR        | 166?    | 165     |          |     |
| 200600011 | F    | 55     | 223     | 220  | 223    | 223     | 220  | 223    | 200600011 | F    | 55     | NR        | 147     | 195     | NR        | 170     | 165     |          |     |
| 200600012 | F    | 56     | 223     | 217  | 223    | 223     | 220  | 223    | 200600012 | F    | 56     | NR        | 181     | 165     | NR        | 147     | 165     |          |     |
| 200600016 | F    | 56     | 223     | 220  | 223    | 223     | 220  | 223    | 200600016 | F    | 56     | NR        | 147     | 195     | NR        | 147     | 165     |          |     |
| 200600018 | F    | 57     | 223     | 220  | 223    | 215     | 220  | 223    | 200600018 | F    | 57     | NR        | 181     | 165     | NR        | 170     | 165     |          |     |
| 200600020 | F    | 57     | 223     | 217  | 230    | 215     | 220  | 223    | 200600020 | F    | 57     | NR        | 181     | 165     | NR        | 170     | 165     |          |     |
| 200600023 | F    | 56     | 223     | 220  | 223    | 215     | 220  | 223    | 200600023 | F    | 56     | NR        | 181     | 165     | NR        | 170     | 165     |          |     |
| 200600024 | F    | 54     | 223     | 217  | 230    | 223     | 220  | 223    | 200600024 | F    | 54     | NR        | 181     | 165     | NR        | 170     | 165     |          |     |
| 200600025 | F    | 53     | 223     | 217  | 230    | 215     | 220  | 223    | 200600025 | F    | 53     | NR        | 181     | 165     | NR        | 170     | 165     |          |     |
| 200600026 | F    | 50     | 223     | 220  | 223    | 223     | 220  | 223    | 200600026 | F    | 50     | NR        | 181     | 165     | NR        | 170     | 165     |          |     |
| 200600027 | F    | 51     | 223     | 217  | 230    | 223     | 220  | 223    | 200600027 | F    | 51     | NR        | 181     | 165     | NR        | 170     | 165     |          |     |
| 200600028 | F    | 53     | 223     | 220  | 230    | 215     | 220  | 223    | 200600028 | F    | 53     | NR        | 181     | 165     | NR        | 147     | 165     |          |     |
| 200600003 | M    | 63     | 223     | 220  | 223    | 223     | 220  | 223    | 200600003 | M    | 63     | NR        | 147     | 195     | NR        | 147     | 165     |          |     |
| 200600005 | M    | 53     | 223     | 220  | 230    | 215     | 220  | 223    | 200600005 | M    | 53     | NR        | 147     | 165     | NR        | 147     | 165     |          |     |
| 200600006 | M    | 63     | 223     | 220  | 223    | 215     | 220  | 223    | 200600006 | M    | 63     | NR        | 181     | 165     | NR        | 147     | 165     |          |     |
| 200600007 | M    | 63     | 223     | 220  | 223    | 223     | 220  | 223    | 200600007 | M    | 63     | NR        | 181     | 165     | NR        | 147     | 165     |          |     |
| 200600008 | M    | 61     | 223     | 217  | 230    | 215     | 220  | 223    | 200600008 | M    | 61     | NR        | 147     | 195     | NR        | 170     | 165     |          |     |
| 200600010 | M    | 60     | 223     | 220  | 223    | 223     | 220  | 223    | 200600010 | M    | 60     | NR        | 181     | 165     | NR        | 147     | 165     |          |     |
| 200600013 | M    | 59     | 223     | 217  | 230    | 223     | 220  | 223    | 200600013 | M    | 59     | NR        | 181     | 165     | NR        | 147     | 165     |          |     |
| 200600014 | M    | 57     | 223     | 220  | 223    | 215     | 220  | 223    | 200600014 | M    | 57     | NR        | 181     | 165     | NR        | 147     | 165     |          |     |
| 200600015 | M    | 58     | 223     | 220  | 223    | 215     | 220  | 223    | 200600015 | M    | 58     | NR        | 181     | 165     | NR        | 147     | 165     |          |     |
| 200600017 | M    | 57     | 223     | 217  | 230    | 223     | 220  | 223    | 200600017 | M    | 57     | NR        | 147     | 195     | NR        | 147     | 165     |          |     |
| 200600019 | M    | 54     | 223     | 220  | 230    | 215     | 220  | 223    | 200600019 | M    | 54     | NR        | 181     | 165     | NR        | 170     | 165     |          |     |
| 200600022 | M    | 52     | 223     | 217  | 223    | 215     | 220  | 223    | 200600022 | M    | 52     | NR        | 181     | 165     | NR        | 147     | 165     |          |     |
| 200600021 | ?(M) | 51     | 223     | 220  | 223    | 223     | 220  | 223    | 200600021 | ?(M) | 51     | NR        | 147     | 195     | NR        | 170     | 165     |          |     |

**UNH 2139**

|      |     |     |
|------|-----|-----|
| 223  | 223 | 215 |
| M 5  | M 7 |     |
| F 9  | F 5 |     |
| Un 1 |     |     |

**cski**

|      |     |
|------|-----|
| 220  | 220 |
| M 8  | M 7 |
| F 9  | F 5 |
| Un 1 |     |

**GM264a**

|      |     |
|------|-----|
| 223  | 223 |
| M 7  | M 7 |
| F 7  | F 7 |
| Un 1 |     |
| 220  | M 5 |
|      | F 7 |

Fisher's Exact using genotypes of all individuals

|            |              |             |
|------------|--------------|-------------|
| $X^2$ 1.33 | $X^2$ 0.0162 | $X^2$ 0.181 |
| P 0.249    | P 0.899      | P 0.671     |

Fisher's Exact using maternal and paternal alleles

|          |             |             |             |
|----------|-------------|-------------|-------------|
| Maternal | $X^2$ NI    | $X^2$ 0.016 | $X^2$ 0.181 |
|          | P Homo      | P 0.899     | P 0.671     |
| Paternal | $X^2$ 1.330 | $X^2$ NI    | $X^2$ NI    |
|          | P 0.249     | P Homo      | P Homo      |

**UNH2095**

No Results

**UNH2086**

|      |     |     |
|------|-----|-----|
| 181  | 170 | 147 |
| M 1  | M 7 |     |
| F 9  | F 2 |     |
| Un 1 |     |     |

**UNH2031**

|      |      |
|------|------|
| 165  | 165  |
| M 9  | M 9  |
| F 11 | F 11 |
| Un 1 |      |

Fisher's Exact using genotypes of all individuals

|            |              |
|------------|--------------|
| $X^2$ 9.28 | $X^2$ 0.0464 |
| P 0.026    | P 0.829      |

Fisher's Exact using maternal and paternal alleles

|          |                  |             |             |
|----------|------------------|-------------|-------------|
| Maternal | $X^2$ No Results | $X^2$ 0.465 | $X^2$ 0.046 |
|          | P Results        | P 0.495     | P 0.829     |
| Paternal | $X^2$ No Results | $X^2$ 7.800 | $X^2$ NI    |
|          | P Results        | P 0.005     | P Homo      |

S15.2: *Metriaclima zebra* family A009 genotypes for LG 5 and LG 7.

| <b>M. zebra</b> |     |        |         |      |        |         |      |        | <b>Meze-A009</b> |     |        |         |         |         |         |          |         |           |     |
|-----------------|-----|--------|---------|------|--------|---------|------|--------|------------------|-----|--------|---------|---------|---------|---------|----------|---------|-----------|-----|
| Ratio M:F       |     |        |         |      |        |         |      |        | total            |     |        |         |         |         |         |          |         |           |     |
| 7M : 18F        |     |        |         |      |        |         |      |        | 25 ind           |     |        |         |         |         |         |          |         |           |     |
| LG 5            |     |        |         |      |        |         |      |        | LG 7             |     |        |         |         |         |         |          |         |           |     |
| Fish            | Sex | Length | UNH2139 | cski | Gm264a | UNH2139 | cski | Gm264a | Fish             | Sex | Length | UNH2095 | UNH2086 | UNH2031 | UNH2095 | UNH2086  | UNH2031 | Fish      | Sex |
| 200600337       | F   |        | 215     | 219  | 230    | 226     | 219  | 220    | 200600323        | M   |        | 132     | 143     | 181     | 127     | 167      | 164     | 200600323 | M   |
|                 |     |        | 226     | 219  | 220    | 226     | 219  | 220    |                  |     |        | 132     | 167     | 195     | 127     | 184      | 181     |           |     |
| 200700702       | F   | 62     | 215     | 219  | 230    | 226     | 219  | 220    | 200700702        | F   | 62     | 132     | 143     | 181     | 127     | 167      | 181     |           |     |
| 200700703       | F   | 52     | 215     | 219  | 230    | 226     | 219  | 220    | 200700703        | F   | 52     | 132     | 143     | 181     | 127     | 184      | 181     |           |     |
| 200700704       | F   | 61     | 215     | 219  | 230    | 226     | 219  | 220    | 200700704        | F   | 61     | 132     | 143     |         | 127     | 167/184? |         |           |     |
| 200700705       | F   | 55     | 226     | 219  | 220    | 226     | 219  | 220    | 200700705        | F   | 55     | 132     | 143     | 181     | 127     | 167      | 164     |           |     |
| 200700706       | F   | 54     | 226     | 219  | 220    | 226     | 219  | 220    | 200700706        | F   | 54     | 132     | 143     | 181     | 127     | 184      | 181     |           |     |
| 200700707       | F   | 59     | 226     | 219  | 220    | 226     | 219  | 220    | 200700707        | F   | 59     | 132     | 143     | 181     | 127     | 167      | 164     |           |     |
| 200700708       | F   | 59     | 226     | 219  | 220    | 226     | 219  | 220    | 200700708        | F   | 59     | 132     | 167     | 195     | 127     | 167      | 164     |           |     |
| 200700709       | F   | 57     | 215     | 219  | 220    | 226     | 219  | 220    | 200700709        | F   | 57     | 132     | 143     | 181     | 127     | 167      | 164     |           |     |
| 200700710       | F   | 58     | 226     | 219  | 230    | 226     | 219  | 220    | 200700710        | F   | 58     | 132     | 143     | 181     | 127     | 184      | 181     |           |     |
| 200700711       | F   | 62     | 215     | 219  | 230    | 226     | 219  | 220    | 200700711        | F   | 62     | 132     | 143     | 181     | 127     | 167      | 164     |           |     |
| 200700714       | F   | 62     | 215     | 219  | 220    | 226     | 219  | 220    | 200700714        | F   | 62     | 132     | 167     | 181     | 127     | 184      | 181     |           |     |
| 200700715       | F   | 56     | 215     | 219  |        | 226     | 219  |        | 200700715        | F   | 56     | 132     | 167     | 195     | 127     | 184      | 181     |           |     |
| 200700716       | F   | 56     | 226     | 219  | 220    | 226     | 219  | 220    | 200700716        | F   | 56     | 132     | 167     | 195     | 127     | 184      | 181     |           |     |
| 200700717       | F   | 60     | 226     | 219  | 220    | 226     | 219  | 220    | 200700717        | F   | 60     | 132     | 167     | 195     | 127     | 184      | 181     |           |     |
| 200700718       | F   | 66     | 215     | 219  | 230    | 226     | 219  | 220    | 200700718        | F   | 66     | 132     | 167     | 181     | 127     | 167      | 181     |           |     |
| 200700719       | F   | 57     | 226     | 219  | 230    | 226     | 219  | 220    | 200700719        | F   | 57     | 132     | 167     | 195     | 127     | 167      | 164     |           |     |
| 200700721       | F   | 52     | 215     | 219  | 220    | 226     | 219  | 220    | 200700721        | F   | 52     | 132     | 143     | 181     | 127     | 184      | 181     |           |     |
| 200700722       | F   | 57     | 215     | 219  | 230    | 226     | 219  | 220    | 200700722        | F   | 57     | 132     | 143     | 181     | 127     | 184      | 181     |           |     |
| 200700698       | M   | 63     | 226     | 219  | 220    | 226     | 219  | 220    | 200700698        | M   | 63     | 132     | 143     | 181     | 127     | 167      | 164     |           |     |
| 200700699       | M   | 68     | 226     | 219  | 230    | 226     | 219  | 220    | 200700699        | M   | 68     | 132     | 143     | 181     | 127     | 167      | 164     |           |     |
| 200700700       | M   | 63     | 215     | 219  | 230    | 226     | 219  | 220    | 200700700        | M   | 63     | 132     | 167     | 195     | 127     | 167      | 164     |           |     |
| 200700701       | M   | 63     | 215     | 219  | 230    | 226     | 219  | 220    | 200700701        | M   | 63     | 132     | 143     | 181     | 127     | 167      | 164     |           |     |
| 200700712       | M   | 68     | 226     | 219  | 220    | 226     | 219  | 220    | 200700712        | M   | 68     | 132     | 143     | 181     | 127     | 184      | 181     |           |     |
| 200700713       | M   | 66     | 215     | 219  | 230    | 226     | 219  | 220    | 200700713        | M   | 66     | 132     | 167     | 195     | 127     | 167      | 164     |           |     |
| 200700720       | M   | 45     | 215     | 219  | 230    | 226     | 219  | 220    | 200700720        | M   | 45     | 132     | 167     | 195     | 127     | 184      | 181     |           |     |

| UNH2139 | cski |
|---------|------|
| 215     | 219  |
| M 4     | M 7  |
| F 10    | F 18 |
| 226     |      |
| M 3     |      |
| F 8     |      |

| Gm264a |
|--------|
| 220    |
| M 5    |
| F 8    |
| 220    |
| M 2    |
| F 9    |

| UNH2095 | UNH2086 |
|---------|---------|
| 132     | 143     |
| M 7     | M 3     |
| F 18    | F 5     |
|         | M 1     |
|         | F 5     |
|         | M 2     |
|         | F 3     |
|         | M 1     |
|         | F 4     |

| UNH2031 |
|---------|
| 181     |
| M 3     |
| F 4     |
| M 1     |
| F 7     |
| 195     |
| M 2     |
| F 2     |
| M 1     |
| F 4     |

Fisher's Exact using genotypes of all individuals

|               |         |            |
|---------------|---------|------------|
| $X^2$ 0.00515 | $X^2$ 0 | $X^2$ 1.19 |
| P 0.943       | P 1     | P 0.276    |

Fisher's Exact using maternal and paternal alleles

|          |             |          |             |
|----------|-------------|----------|-------------|
| Maternal | $X^2$ 0.005 | $X^2$ NI | $X^2$ 1.190 |
|          | P 0.943     | P Homo   | P 0.276     |
| Paternal | $X^2$ NI    | $X^2$ NI | $X^2$ NI    |
|          | P Homo      | P Homo   | P Homo      |

Fisher's Exact using genotypes of all individuals

|         |            |            |
|---------|------------|------------|
| $X^2$ 0 | $X^2$ 1.98 | $X^2$ 2.75 |
| P 1     | P 0.576    | P 0.431    |

Fisher's Exact using maternal and paternal alleles

|          |          |             |             |
|----------|----------|-------------|-------------|
| Maternal | $X^2$ NI | $X^2$ 0.006 | $X^2$ 0.121 |
|          | P Homo   | P 0.939     | P 0.728     |
| Paternal | $X^2$ NI | $X^2$ 1.190 | $X^2$ 2.610 |
|          | P Homo   | P 0.276     | P 0.106     |

S16.1: *Metriaclima zebra* 'Nankoma blue' family A006 genotypes for LG 5 and LG 7.

**M. zebra 'Nankoma blue' Mena-A006** Ratio M:F 21M : 12F 6 Unknown total 38 ind

Table with columns for Fish, Sex, Length, and marker genotypes (UNH2139, cski, GM264A, UNH2095, UNH2086, UNH2031) for individuals across LG 5 and LG 7. Includes a large 'Review' watermark.

Genotype breakdown for UNH2139, cski, and GM264A markers, showing counts for maternal (M) and paternal (P) alleles.

Fisher's Exact using genotypes of all individuals

Summary table for Fisher's Exact test using all genotypes, showing chi-squared values and p-values for maternal and paternal alleles.

Fisher's Exact using maternal and paternal alleles

Summary table for Fisher's Exact test using only maternal and paternal alleles, showing chi-squared values and p-values.

Genotype breakdown for UNH2095, UNH2086, and UNH2031 markers, showing counts for maternal (M) and paternal (P) alleles.

Fisher's Exact using genotypes of all individuals

Summary table for Fisher's Exact test using all genotypes for LG 7, showing chi-squared values and p-values.

Fisher's Exact using maternal and paternal alleles

Summary table for Fisher's Exact test using only maternal and paternal alleles for LG 7, showing chi-squared values and p-values.

S17.1: *Pseudotropheus polit* family A003 genotypes for LG 5 and LG 7.

**Ps. polit**  
**Pspo-A003** Ratio M:F total  
 7M : 9F 18 ind  
 2 Unknown

| LG 5      |     |        |         |      |        | LG 7      |     |        |         |         |         |           |     |
|-----------|-----|--------|---------|------|--------|-----------|-----|--------|---------|---------|---------|-----------|-----|
| Fish      | Sex | Length | UNH2139 | cski | Gm264a | Fish      | Sex | Length | UNH2095 | UNH2086 | UNH2031 | Fish      | Sex |
| 200600401 | F   |        | 228     | 217  | 225    | 200600819 | M   |        | 137     | 194     | 131     | 200600819 | M   |
|           |     |        | 228     | 217  | 197    |           |     |        | 128     | 194     | 131     |           |     |
| 200601426 | F   | 39     | 228     | 217  | 225    | 200601426 | F   | 39     | 128     | 194     | 131     | 200601426 | F   |
| 200601427 | F   | 35     | 228     | 217  | 225    | 200601427 | F   | 35     | 137     | 194     | 131     | 200601427 | F   |
| 200601428 | F   | 36     | 228     | 217  | 197    | 200601428 | F   | 36     | 128     | 194     | 131     | 200601428 | F   |
| 200601431 | F   | 29     | 228     | 217  | 197    | 200601431 | F   | 29     | 137     | 194     | 131     | 200601431 | F   |
| 200601434 | F   | 36     | 228     | 217  | 225    | 200601434 | F   | 36     | 137     | 194     | 131     | 200601434 | F   |
| 200601437 | F   | 36     | 228     | 217  | 225    | 200601437 | F   | 36     | 128     | 194     | 131     | 200601437 | F   |
| 200601439 | F   | 34     | 228     | 217  | 197    | 200601439 | F   | 34     | 137     | 194     | 131     | 200601439 | F   |
| 200601441 | F   | 33     | 228     | 217  | 197    | 200601441 | F   | 33     | 128     | 194     | 131     | 200601441 | F   |
| 200601442 | F   | 29     | 228     | 217  | 197    | 200601442 | F   | 29     | 128     | 194     | 131     | 200601442 | F   |
| 200601425 | M   | 39     | 228     | 217  | 225    | 200601425 | M   | 39     | 128     | 194     | 131     | 200601425 | M   |
| 200601429 | M   | 33     | 228     | 217  | 197    | 200601429 | M   | 33     | 137     | 194     | 131     | 200601429 | M   |
| 200601430 | M   | 36     | 228     | 217  | 225    | 200601430 | M   | 36     | 137     | 194     | 131     | 200601430 | M   |
| 200601432 | M   | 40     | 228     | 217  | 197    | 200601432 | M   | 40     | 137     | 194     | 131     | 200601432 | M   |
| 200601433 | M   | 36     | 228     | 217  | 197    | 200601433 | M   | 36     | 128     | 194     | 131     | 200601433 | M   |
| 200601435 | M   | 39     | 228     | 217  | 225    | 200601435 | M   | 39     | 128     | 194     | 131     | 200601435 | M   |
| 200601440 | M   | 39     | 228     | 217  | 197    | 200601440 | M   | 39     | 128     | 194     | 131     | 200601440 | M   |
| 200601436 | ?   | 34     | 228     | 217  | 225    | 200601436 | ?   | 34     | 137     | 194     | 131     | 200601436 | ?   |
| 200601438 | ?   | 32     | 228     | 217  | 225    | 200601438 | ?   | 32     | 137     | 194     | 131     | 200601438 | ?   |

**UNH2139**

|      |      |      |
|------|------|------|
| 228  | 217  | 223  |
| M 7  | M 4  | M 3  |
| F 9  | F 6  | F 1  |
| Un 2 | Un 1 | Un 1 |

**Gm264a**

|      |
|------|
| 197  |
| M 3  |
| F 4  |
| Un 2 |
| 197  |
| M 4  |
| F 5  |

**UNH2095**

|     |      |
|-----|------|
| 128 | 137  |
| M 4 | M 1  |
| F 0 | F 3  |
| M 2 | Un 2 |
| F 6 |      |

**UNH2086**

|      |     |
|------|-----|
| 194  | 163 |
| M 1  | M 6 |
| F 8  | F 1 |
| Un 2 |     |

**UNH2031**

|      |
|------|
| 131  |
| M 7  |
| F 9  |
| Un 2 |

Fisher's Exact using genotypes of all individuals

$X^2$  0 P 1       $X^2$  1.4 P 0.237       $X^2$  0.004 P 0.949

Fisher's Exact using genotypes of all individuals

$X^2$  6.86 P 0.032       $X^2$  8.91 P 0.003       $X^2$  0 P 1

Fisher's Exact using maternal and paternal alleles

Maternal  $X^2$  NI P Homo       $X^2$  NI P Homo       $X^2$  0.004 P 0.949  
 Paternal  $X^2$  NI P Homo       $X^2$  1.400 P 0.237       $X^2$  NI P Homo

Fisher's Exact using maternal and paternal alleles

Maternal  $X^2$  NI P Het       $X^2$  NI P Homo       $X^2$  NI P Homo  
 Paternal  $X^2$  NI P Het       $X^2$  8.91 P 0.003       $X^2$  NI P Homo
